# Supplementary material for: Drought sensitivity shapes species distribution patterns in tropical forests
Source: Springer Nature journal article supplement (doi:10.1038/nature05747), 2007-05-01
Supplement: 41586_2007_BFnature05747_MOESM433_ESM.pdf [file 41586_2007_BFnature05747_MOESM433_ESM.pdf]

## SUPPLEMENTARY INFORMATION

| Site       | Utm.x     | Utm.y      | elev | DrySeason | MeanRain    | Years |
|------------|-----------|------------|------|-----------|-------------|-------|
| aguaclara  | 642020    | 1035263    | 460  | 110       | 3704.017667 | 36    |
| alhajuela  | 651531    | 1017770    | 40   | 143       | 2346.231867 | 45    |
| arcasonia  | 663159    | 1016401    | 265  | 126       | 2935.605    | 4     |
| balboafaa  | 659465    | 991563     | 12   | 148       | 1913.609    | 30    |
| balboahts  | 658943    | 990457     | 30   | 147       | 1849.4375   | 40    |
| bci        | 627823    | 1013187    | 34   | 130       | 2520.918543 | 46    |
| candelaria | 662400    | 1037456    | 98   | 116       | 3011.846278 | 36    |
| cano       | 629381    | 1003281    | 33   | 142       | 2112.37697  | 33    |
| canones    | 603059    | 989140     | 104  | 129       | 2414.246923 | 26    |
| cascadas   | 645032    | 1003939    | 47   | 146       | 2107.18125  | 32    |
| chamon     | 684687.13 | 1033097.01 | 560  | 84        | 3763.01     | 4     |
| chico      | 663692    | 1024135    | 104  | 140       | 2523.986914 | 35    |
| chorro     | 610980    | 992092     | 42   | 142       | 2158.216611 | 36    |
| ciento     | 637706    | 1028622    | 38   | 119       | 3079.365886 | 35    |
| cocosolo   | 622200    | 1036500    | 5    | 128       | 2652.256    | 15    |
| crisobal   | 622200    | 1036500    | 5    | 127       | 3089.510857 | 35    |
| diablo     | 656851    | 991147     | 10   | 149       | 1795.494286 | 21    |
| dosbocas   | 672243.7  | 1045267.3  | 230  | 77        | 4697.306667 | 6     |
| empirehill | 646749    | 1001350    | 61   | 144       | 2127.04     | 25    |
| escandelos | 656027    | 1041803    | 480  | 109       | 3096.721143 | 35    |
| esperanza  | 680929.2  | 1040575.88 | 520  | 54        | 4818.38     | 6     |
| frijolito  | 641059    | 1019235    | 349  | 129       | 2302.328571 | 7     |
| galeta     | 625044    | 1039374    | 5    | 131       | 2817.9825   | 12    |
| gamboa     | 643498    | 1007316    | 34   | 146       | 2125.449422 | 45    |
| gasparilla | 608249.79 | 979824.62  | 330  | 144       | 2022.475    | 4     |
| gatun      | 618529    | 1024534    | 25   | 121       | 2889.226372 | 43    |
| gatunwest  | 617598    | 1023985    | 33   | 107       | 2834.64     | 8     |
| guacha     | 616558    | 1014434    | 29   | 130       | 2244.773333 | 33    |
| hodgeshill | 648175    | 999817     | 70   | 149       | 1969.950774 | 31    |
| humedad    | 605561    | 1000154    | 31   | 129       | 2263.367588 | 34    |
| jagua      | 604849    | 965922     | 546  | 117       | 2805.974286 | 7     |
| limonbay   | 619145    | 1034081    | 3    | 120       | 2772.228571 | 7     |
| limpio     | 668211    | 1031433    | 684  | 133       | 2745.74     | 1     |
| maddendam  | 652004    | 1018207    | 79   | 139       | 2394.458    | 10    |
| miraflores | 652774    | 996698     | 20   | 143       | 1997.891429 | 7     |
| montelirio | 625943    | 1021512    | 34   | 129       | 2599.474529 | 34    |
| pedromigel | 651959    | 997449     | 34   | 148       | 1931.86085  | 40    |
| peluca     | 657997    | 1037188    | 107  | 115       | 2880.25227  | 37    |
| raices     | 611185    | 1004937    | 34   | 134       | 2094.280286 | 35    |
| riopiedras | 675766    | 1026276    | 150  | 121       | 2599.936471 | 17    |
| salamanca  | 655696    | 1028848    | 82   | 141       | 2196.747032 | 31    |
| sanmiguel  | 664211    | 1041459    | 520  | 91        | 3817.1335   | 36    |
| santarosa  | 647800    | 1015491    | 50   | 141       | 2320.651765 | 17    |
| vistamares | 675600    | 1021352    | 969  | 115       | 3254.828571 | 7     |
