# Supplementary material for: Drought sensitivity shapes species distribution patterns in tropical forests
Source: Springer Nature journal article supplement (doi:10.1038/nature05747), 2007-05-01
Supplement: 41586_2007_BFnature05747_MOESM434_ESM.pdf [file 41586_2007_BFnature05747_MOESM434_ESM.pdf]

## SUPPLEMENTARY INFORMATION

| Site                        | Utm.x      | Utm.y       | elev | PredDrySeason |
|-----------------------------|------------|-------------|------|---------------|
| C1                          | 651916.457 | 993635.535  | 50   | 146.598578    |
| C2                          | 651916.457 | 993735.535  | 0    | 149.0681299   |
| C3                          | 651916.457 | 993835.535  | 0    | 149.0073198   |
| C4                          | 652016.457 | 993635.535  | 0    | 149.1381425   |
| CampoChagres                | 653822     | 1018532     | 109  | 128.6485439   |
| Caritas                     | 653006     | 1004564     | 155  | 134.7394727   |
| CerroGalera                 | 655382     | 985400      | 64   | 151.2170279   |
| CerroLaTorre                | 651373     | 987031      | 300  | 137.9129807   |
| Coba1                       | 679935     | 1017722     | 515  | 110.9976007   |
| Coba2                       | 678932     | 1018430     | 643  | 103.9970381   |
| EICharco                    | 646885     | 1004415     | 116  | 136.2404805   |
| G1                          | 625934.79  | 1006017.261 | 55   | 136.4252542   |
| G2                          | 625974.79  | 1006497.261 | 60   | 135.8840105   |
| LP1                         | 620342     | 1008821     | 80   | 132.9404435   |
| LP2                         | 622483     | 1008890     | 40   | 135.1197985   |
| P01                         | 614856.893 | 1031786.395 | 20   | 121.5068359   |
| P02                         | 613985.386 | 1030725.352 | 100  | 118.023278    |
| P03                         | 614674.344 | 1023801.509 | 180  | 118.2484952   |
| P04                         | 615018.567 | 1023547.894 | 180  | 118.4343956   |
| P05                         | 637157.807 | 1012427.871 | 60   | 133.306712    |
| P06                         | 637983.733 | 1012395.134 | 60   | 133.4026248   |
| P07                         | 638143.983 | 1012885.56  | 80   | 132.1069984   |
| P08                         | 637732.266 | 1013699.351 | 180  | 126.5135194   |
| P09                         | 638364.769 | 1013754.24  | 160  | 127.5504919   |
| P10                         | 625401.777 | 1011039.311 | 90   | 131.5510373   |
| P11                         | 623291.075 | 1011064.612 | 60   | 132.8596328   |
| P12                         | 628587.257 | 1014891.284 | 10   | 133.5503702   |
| P13                         | 629528.927 | 1015836.236 | 55   | 130.7850749   |
| P14                         | 625124.616 | 1012544.66  | 60   | 132.1283448   |
| P15                         | 637861     | 1012976.032 | 70   | 132.5320134   |
| P16                         | 641463.922 | 1011327.963 | 160  | 129.311111    |
| P17                         | 641108.246 | 1011887.932 | 120  | 130.962152    |
| P18                         | 622784.714 | 1010902.859 | 58   | 133.0126118   |
| P19                         | 634683     | 1017102     | 160  | 125.1759031   |
| P20                         | 635754     | 1016123     | 160  | 125.8697921   |
| P21                         | 643560.09  | 1010755.013 | 110  | 132.3827831   |
| P22                         | 643599.329 | 1011461.238 | 180  | 128.4144312   |
| P23                         | 645805.115 | 1008575.307 | 30   | 137.9634407   |
| P24                         | 645415.957 | 1008797.404 | 50   | 136.7804265   |
| P25                         | 632002.57  | 1003751.3   | 110  | 135.5781731   |
| P26                         | 633321.969 | 1003528.646 | 50   | 138.8714206   |
| P27                         | 648907.021 | 1004027.467 | 180  | 133.4233517   |
| P28                         | 649196.438 | 1004697.458 | 160  | 134.0547078   |
| P29                         | 649677.745 | 993572.627  | 100  | 143.9004542   |
| P30                         | 649220.6   | 994670.2    | 180  | 139.1423714   |
| P31                         | 637474.342 | 1034700.331 | 343  | 105.4700885   |
| P32                         | 639798.3   | 1034445.1   | 363  | 104.8270109   |
| P33                         | 647619.7   | 1038364.1   | 600  | 91.16970752   |
| P34                         | 660392.9   | 1041453.1   | 210  | 110.2035539   |
| P35                         | 656576.8   | 1045986.9   | 830  | 75.71888279   |
| P36                         | 661790     | 1039037     | 200  | 112.3074263   |
| P37                         | 688165     | 1030608.7   | 600  | 99.61693229   |
| P40                         | 670203.9   | 1026675.4   | 160  | 122.6231009   |
| P41                         | 674031.8   | 1027110.7   | 280  | 116.6377861   |
| S0                          | 612610.163 | 1026067.188 | 140  | 118.7050681   |
| S1                          | 612710.163 | 1026067.188 | 0    | 125.7992842   |
| S2                          | 612710.163 | 1026167.188 | 0    | 125.7384741   |
| S3                          | 612710.163 | 1026267.188 | 0    | 125.677664    |
| S4                          | 612710.163 | 1026367.188 | 0    | 125.6168539   |
| Albrook                     | 657865.5   | 992602.5    | 53   | 147.6224033   |
| Camino al Castillo San Lorr | 611622.1   | 1032310.3   | 67   | 118.5120285   |
| Camino a Patacon            | 656980.2   | 1000343.7   | 50   | 142.9853248   |

| Site                        | Utm.x     | Utm.y      | elev   | PredDrySeason |
|-----------------------------|-----------|------------|--------|---------------|
| Camino Plantacion           | 648012.58 | 1005029.71 | 140    | 134.7558659   |
| Campo Chagres               | 653821.8  | 1018531.6  | 109.8  | 128.608283    |
| Cerro Azul-Finca Coba_P1    | 679934.7  | 1017721.9  | 515.1  | 110.9925732   |
| Cerro Azul-Finca Coba_P2    | 678932.3  | 1018430    | 643.9  | 103.9515191   |
| Cerro Azul -Finca Rodrigo ( | 679059.8  | 1018209.8  | 597    | 106.4706356   |
| Cerro Jefe                  | 670283.08 | 1022233.04 | 887.82 | 88.49882939   |
| Cerro Miñon_PH              | 652857.76 | 988501.98  | 120    | 146.2644137   |
| Cerro Miñon_T               | 653059.91 | 988609.06  | 120    | 146.217901    |
| Cerro Patacón               | 654322.84 | 996676.38  | 40     | 145.4769558   |
| Cerro Pelado-Gamboa_P       | 642114.48 | 1008521.14 | 80     | 135.1263891   |
| Cerro Pelado-Gamboa_PH      | 643153.41 | 1008486.53 | 120    | 133.2187528   |
| Cerro Pelado-Gamboa_T1      | 642316.86 | 1009103.98 | 160    | 130.7420083   |
| Cerro Pelado-Gamboa_T2      | 642019.42 | 1009032.11 | 100    | 133.7947751   |
| Chagrecito 1                | 684333.3  | 1034639.51 | 413    | 106.2767367   |
| Chagrecito 2                | 684396.96 | 1035202.55 | 309    | 111.2033628   |
| Chagrecito anexo            | 684365.13 | 1034921.03 | 300    | 111.8270914   |
| Chagres-Chilibre_PH         | 654038.4  | 1018653.1  | 85     | 129.8093907   |
| Chagres-Chilibre_T          | 654128.85 | 1018496.78 | 100    | 129.1536641   |
| Clayton                     | 657610.1  | 995552.6   | 35     | 146.715872    |
| Desmbc. del Río Chagres-(   | 609973.3  | 1030303.6  | 41     | 120.8963629   |
| Esperanza 1                 | 680538.37 | 1036732.69 | 306    | 110.0696203   |
| Esperanza 2                 | 680113.22 | 1036889.23 | 286    | 110.9474488   |
| Esperanza anexo             | 680325.8  | 1036810.96 | 260    | 112.3303957   |
| Fuerte San Lorenzo - Colór  | 610191.9  | 1030821.5  | 25     | 121.4112599   |
| Fuerte San Lorenzo - Colór  | 611456.2  | 1032292.5  | 72     | 118.2545496   |
| Fuerte Sherman-Area de M    | 615161.6  | 1032892.8  | 9      | 121.4187501   |
| Fuerte Sherman-Colón-Roc    | 615059.3  | 1031993.8  | 103    | 117.1989382   |
| Gigante                     | 625674.79 | 1005795.26 | 31     | 137.7509006   |
| Howard                      | 654199.81 | 988294.04  | 40     | 150.5629428   |
| Isla Galeta - Colón         | 625384    | 1035867.1  | 15     | 120.2471428   |
| Límites del Parque Nac Ch   | 672241.83 | 1025076.65 | 783.61 | 92.22366084   |
| Límites del Parque Nac Ch   | 671557.6  | 1023325.5  | 730.05 | 95.93609465   |
| Mocambo                     | 657335.7  | 1002463.3  | 110    | 138.6926744   |
| Nva Provide-Cln-Río Palen   | 632144.3  | 1025154.1  | 56     | 125.3089441   |
| Paraiso -Cerro Luisa_P1     | 652231.35 | 997995.2   | 140    | 139.421788    |
| Paraiso -Cerro Luisa_P2     | 652068.82 | 998443.65  | 70     | 142.6766352   |
| Paraiso_T                   | 652261.89 | 997940.48  | 150    | 138.9518013   |
| Parq Metropolitano_T1       | 659753.73 | 994195.33  | 35     | 147.7384955   |
| Parq Metropolitano_T2       | 660012.58 | 994227.35  | 40     | 147.4898084   |
| Parq Metropolitano_T3       | 659490.99 | 994653.35  | 90     | 144.6523964   |
| Parq Metropolitano_T4       | 659775.91 | 993498.15  | 20     | 148.923601    |
| Parque Camino de Cruces     | 659881.2  | 996176.7   | 25     | 147.0514253   |
| Quebrada López-Colón        | 631842.4  | 1030945.5  | 0      | 124.5934116   |
| Santa Rita - Colón_P1       | 637474.34 | 1034700.33 | 230    | 111.188707    |
| Santa Rita - Colón_P2       | 634789.7  | 1032740.2  | 215    | 112.89272     |
| Santa Rita - Colón_T        | 637143.8  | 1034331.4  | 227    | 111.5344577   |
| Santa Rita_P                | 639831.7  | 1034474.8  | 340    | 105.9759904   |
| Santa Rita_sierra           | 634819.9  | 1032891.75 | 205    | 113.3094138   |
| Santa Rita_torres           | 634130.31 | 1030896.49 | 220    | 113.7001656   |
| Sendero El Charco_P1        | 645803.77 | 1005014.08 | 95     | 136.8394318   |
| Sendero El Charco_P2        | 645887.72 | 1005127.46 | 120    | 135.5130298   |
| Sendero El Charco_P3        | 646511.63 | 1004336.81 | 100    | 137.0633846   |
| Sendero El Charco_P4        | 646836.4  | 1004404.78 | 85     | 137.8110473   |
| Sendero El Charco_P5        | 646996.73 | 1004470.85 | 90     | 137.5325882   |
| Sendero El Charco_PH        | 647054.47 | 1004779.1  | 140    | 134.8200926   |
| Sendero El Charco_T         | 647052.6  | 1004732.14 | 120    | 135.8606217   |
| SHERMAN-Colón-Camino        | 611714.1  | 1025940.9  | 101    | 120.6730866   |
| SHERMAN-Colón-Camino        | 612272.3  | 1025516.7  | 171    | 117.4399043   |
| SHERMAN-Colón-Camino        | 612210.3  | 1025543.1  | 166    | 117.6711811   |
| SHERMAN-Colón-Camino        | 612305.1  | 1026051.9  | 169    | 117.2186816   |
