# Supplementary material for: Drought sensitivity shapes species distribution patterns in tropical forests
Source: Springer Nature journal article supplement (doi:10.1038/nature05747), 2007-05-01
Supplement: 41586_2007_BFnature05747_MOESM436_ESM.pdf [file 41586_2007_BFnature05747_MOESM436_ESM.pdf]

| species                     | OccurProbDry | OccurProbWet | LogRatio     | LogRatioLower | LogRatioUpper | MedianBandWidth | LowerBandWidth | UpperBandWidth |
|-----------------------------|--------------|--------------|--------------|---------------|---------------|-----------------|----------------|----------------|
| Alibertia edulis            | 0.686720647  | 0.043067482  | 1.253036845  | 0.646619836   | 3.80529163    | 5.451358103     | 2.144645274    | 10.41443485    |
| Andira inermis              | 0.598502456  | 0.389183474  | 0.353277942  | 0.026805295   | 0.459728482   | 3.901763005     | 1.490798131    | 29.52780435    |
| Beilschmiedia pendula       | 0.006433702  | 0.332395702  | -1.801384656 | -3.792398591  | -0.947371508  | 2.932494367     | 1.835967916    | 4.565312974    |
| Brosimum alicastrum         | 0.550125428  | 0.154477817  | 0.572246717  | 0.358787749   | 0.791231384   | 7.185216394     | 4.229313673    | 12.38574301    |
| Brosimum utile              | 0.000416924  | 0.67764294   | -3.564197196 | -7.762127645  | -1.718597949  | 5.330961021     | 3.373506633    | 8.58790725     |
| Calophyllum longifolium     | 0.214407763  | 0.779001853  | -0.595548048 | -0.853662281  | -0.397080905  | 7.141693339     | 4.762875224    | 11.79192776    |
| Capparis frondosa           | 0.176789382  | 0.1642495    | 0.156907236  | 0.000847688   | 3.14500104    | 26.00100239     | 2.227350463    | 354.0500801    |
| Casearia arguta             | 0.076688826  | 0.071532527  | 0.346008297  | 0.001768502   | 1.359067886   | 20.42321858     | 5.275259765    | 345.5887537    |
| Cordia alliodora            | 0.761553857  | 0.025698207  | 1.649803325  | 0.740867731   | 3.502668241   | 3.1627374       | 1.929366783    | 7.353617582    |
| Crossopetalum parviflorum   | 0.120081189  | 0.197041441  | -0.492145351 | -1.40523198   | -0.002026117  | 4.851238403     | 2.595099452    | 142.963296     |
| Cupania sylvatica           | 0.31978923   | 0.004108604  | 2.006414577  | 1.274497272   | 4.03806045    | 4.359817891     | 2.599688616    | 6.855749178    |
| Dipteryx panamensis         | 0.100501729  | 0.099080328  | 0.019629198  | 0.000642254   | 0.564939029   | 63.2747114      | 4.365761679    | 352.4156167    |
| Faramea occidentalis        | 0.461893501  | 0.178860802  | 0.427956954  | 0.347838255   | 0.460272768   | 3.800075252     | 1.914421926    | 7.331708805    |
| Garcinia intermedia         | 0.070290872  | 0.042999852  | 0.008231838  | -0.583621278  | 0.270914378   | 4.863824971     | 3.209979524    | 9.382210052    |
| Guapira standleyana         | 3.28E-09     | 2.08E-35     | 28.12978495  | 6.964822444   | 131.1933862   | 1.557309425     | 0.746700066    | 3.288240609    |
| Guarea guidonia             | 0.334314417  | 0.126848738  | 0.406445778  | 0.307660638   | 0.527818575   | 5.208757526     | 2.552247694    | 11.4328292     |
| Herrania purpurea           | 0.165052042  | 0.006274071  | 2.349308659  | 0.576186054   | 36.82723122   | 2.614863665     | 0.612905581    | 8.153093155    |
| Hybanthus prunifolius       | 0.004979494  | 1.02E-08     | 6.305808986  | 1.743353662   | 53.97062473   | 2.558548564     | 0.859538668    | 5.672044108    |
| Hymenaea courbaril          | 0.453440324  | 0.086277662  | 0.73433904   | 0.463339302   | 0.782064111   | 7.043934001     | 3.774952317    | 14.69667388    |
| Inga sapindoides            | 0.101402271  | 0.147226696  | -0.210461898 | -1.035269166  | 0.108051849   | 3.536659953     | 2.232438261    | 5.545995726    |
| Lacistema aggregatum        | 0.941733967  | 0.699064802  | 0.138802356  | 0.071111835   | 0.179617441   | 7.219030947     | 3.700112372    | 17.60759794    |
| Lacmellea panamensis        | 0.223216567  | 0.373268118  | -0.562530491 | -1.349249195  | -0.003260024  | 6.779621777     | 3.371810882    | 167.1761582    |
| Licania platypus            | 0.061963826  | 0.056955341  | 1.512149536  | 0.000849097   | 5.699323702   | 6.510341173     | 2.875586812    | 333.1881566    |
| Mouriri myrtilloides        | 0.000116146  | 0.000322222  | -0.462556826 | -0.516105095  | -0.35738481   | 1.826987176     | 0.84481358     | 3.642707348    |
| Myrcia gatunensis           | 0.469687102  | 0.460409154  | 0.084889988  | 0.00047298    | 0.201663803   | 16.88783106     | 1.681229783    | 347.9605256    |
| Ouratea lucens              | 0.413505404  | 0.40385528   | 0.12478116   | 0.000476682   | 0.290548403   | 13.41827491     | 3.168512209    | 357.1149587    |
| Picramnia latifolia         | 0.267647641  | 0.006814112  | 2.767227622  | 0.391744296   | 12.39549366   | 2.361641319     | 1.0273058      | 11.21394054    |
| Posoqueria latifolia        | 0.930410989  | 0.130936251  | 0.859871759  | 0.73651904    | 0.944984139   | 3.153937497     | 1.928396821    | 5.222994676    |
| Pouteria reticulata         | 0.222950542  | 0.223636284  | -0.001527876 | -0.154092653  | -0.000371256  | 185.6796317     | 17.9575213     | 366.7633947    |
| Pseudobombax septenatum     | 0.755720238  | 0.025956574  | 1.667951601  | 0.769157046   | 3.58808949    | 3.425448323     | 2.053441152    | 7.621879845    |
| Psidium friedrichsthalianum | 0.025005301  | 0.024749958  | 0.004669829  | 0.000836383   | 12.69046524   | 152.5309504     | 2.740226544    | 358.9974361    |
| Psychotria horizontalis     | 0.263923009  | 0.221690156  | 0.367799954  | 0.001819655   | 0.712462905   | 12.12269294     | 3.265953912    | 305.1877548    |
| Pterocarpus rohrii          | 0.181829762  | 0.18235657   | -0.001209093 | -0.693436955  | -0.000256652  | 155.9497116     | 4.411345543    | 366.6872595    |
| Sorocea affinis             | 0.366570559  | 0.095400717  | 0.675800129  | 0.307914369   | 1.225149112   | 2.84651879      | 1.770095505    | 5.335413178    |
| Swartzia simplex            | 0.290682485  | 0.164001441  | 0.297368393  | 0.263928748   | 0.31773949    | 4.071677292     | 2.183360885    | 7.974864731    |
| Tabebuia rosea              | 0.632381985  | 0.174937697  | 0.627079915  | 0.328678902   | 0.828009772   | 4.918553218     | 2.453157495    | 13.90314722    |
| Tetragastris panamensis     | 0.437286106  | 0.439845745  | -0.00657253  | -0.373791402  | -0.000318722  | 81.70664751     | 4.664045316    | 364.5632461    |
| Thevetia ahouai             | 0.240905264  | 0.238970425  | 0.004087387  | 0.000683513   | 0.293827192   | 140.8755138     | 8.108293226    | 367.2559795    |
| Trichilia tuberculata       | 0.233253313  | 0.154644143  | 0.154361843  | -0.097109723  | 0.238496789   | 4.61152631      | 3.298054628    | 6.517077756    |
| Unonopsis panamensis        | 4.04E-10     | 0.212158063  | -9.920480534 | -79.04859908  | -2.854551191  | 2.849172179     | 1.066980474    | 5.863623387    |
| Virola surinamensis         | 0.053133667  | 0.415519308  | -0.992987464 | -2.101601169  | -0.538142167  | 4.870363605     | 2.718789125    | 9.20299061     |
| Vochysia ferruginea         | 0.375298167  | 0.436723404  | -0.074548985 | -0.103700186  | 0.071692762   | 4.862721455     | 1.767580445    | 16.28491822    |
| Xylopia macrantha           | 0.001832373  | 0.116061349  | -2.001549963 | -4.573779874  | -0.844050293  | 2.026079716     | 1.339408053    | 3.586300763    |
| Xylosma chlorantha          | 0.041349632  | 0.041380889  | -0.000456414 | -0.026219284  | -0.000111633  | 187.1936647     | 27.26530591    | 370.8535713    |
