# Supplementary material for: Drought sensitivity shapes species distribution patterns in tropical forests
Source: Springer Nature journal article supplement (doi:10.1038/nature05747), 2007-05-01
Supplement: 41586_2007_BFnature05747_MOESM438_ESM.pdf [file 41586_2007_BFnature05747_MOESM438_ESM.pdf]

## SUPPLEMENTARY INFORMATION

```
##### NPMR: Gaussian kernel fitting #####
# y is a vector of single response variable
# x is a matrix of predictors; must be same number of x's and y's (dim(x)[1] =
length(y))
# with just one predictor, x can be a vector
# tolerance is a vector of the kernels' Gaussian SDs; must be same as the number
of predictors (length(tolerance) = dim(x)[2])

# Function setupDist.kernelGauss
# Calculates the distance matrix for each predictor. For a single predictor,
distances are in a NxN matrix, where
# N is the number records (number of data points). The function outer creates
this matrix in one step.
# The complete set of distance matrices (one per predictor) are returned as a 3D
array

setupDist.kernelGauss=function(x)
{
  predictors=dim(x)[2]
  if(is.null(predictors)) predictors=1

  records=dim(x)[1]
  if(predictors==1) records=length(x)

  # Declare blank 3D array
  distmatrix=array(dim=c(predictors,records,records))

  # Use outer to create one distance matrix for each predictor
  if(predictors==1) distmatrix[1,,]=outer(x,x,"-")
  else for(i in 1:predictors) distmatrix[i,,]=outer(x[,i],x[,i],"-")

  return(distmatrix)
}

# Function kernelGauss
# Calculates a Gaussian kernel for a single response variable y, given
tolerances for each Gaussian and a matrix of distances (one for each predictor,
as created
# by the function setupDist.kernelGauss). The weightings from each predictor are
multiplied together to produce the total weight, as in McCune's NPMR

kernelGauss=function(y,tolerance,distmatrix,elimself=TRUE)
{
  predictors=length(tolerance)
  records=length(y)

  for(i in 1:predictors)
  {
    wt=dnorm(distmatrix[i,,],mean=0,sd=tolerance[i]) # Gaussian weightings
    calculated from distance matrix for one predictor
    if(elimself) diag(wt)=0 # Diagonal set to zero so
    prediction at a point does not use that point

    if(i==1) totalwt=wt
    else totalwt=totalwt*wt # This is total weight,
    product of weightings from each predictor
  }

  y.By.WtProduct=t(apply(totalwt,1,vectMult,v2=y)) # Uses R function apply
  and my function vectMult (at bottom) to multiply # response y by each row
  of Gaussian weights
```

```

prediction=rowSums(y.By.WtProduct)/rowSums(totalwt) # This is eq. 3 in McCune
paper

return(prediction)
}

# Function llike.NPMR. Likelihood: probability of observing the response's y
given the prediction from the NPMR kernel.
# Three options allowed here: Poisson, negative binomial, and Gaussian.
# Parameters are the tolerances of the kernel; function kernelGauss is
calculated using these parameters and the distance matrix,
# passed as the argument dist. The negative binomial and normal require an
additional parameter, called k here, passed as the final parameter.
# k serves as the clumping parameter of the negative binomial or the standard
deviation of the Gaussian

# Other likelihood functions could be handled.

# current options for argument link are "poisson", "negbinom", "binom", and
"normal"

llike.NPMR=function(param,y,dist,link="poisson")
{
  noparam=length(param)

  if(link=="poisson" | link=="binom") tolerance=param
  else
  {
    tolerance=param[-noparam]
    k=param[noparam]
  }

  if(length(param[param<=0])>0) return(-Inf)
# Avoid negative parameters, which crash likelihood

  pred=kernelGauss(y=y,tolerance=tolerance,distmatrix=dist)
# Calculate kernel given distmatrix and tolerances

  if(link=="binom" & (length(pred[pred>=1])>0 | length(pred[pred<=0])>0))
return(-Inf)

  if(link=="poisson") llike=dpois(y,lambda=pred,log=T)
  else if(link=="binom") llike=dbinom(y,size=1,prob=pred,log=T) # Calculate log-
likelihood with R's density functions
  else if(link=="negbinom") llike=dnbinom(y,mu=pred,size=k,log=T) # Calculate
log-likelihood with R's density functions
  else if(link=="normal") llike=dnorm(y,mean=pred,sd=k,log=T)

  totallike=sum(llike)
# Total log-likelihood

  if(counter%10==1) cat(counter,round(param,2),round(totallike,4),"\n")
# Output current parameters and likelihood to screen
  counter<-counter+1

  return(sum(totallike))
}

# Function fit.kernel.optim. Finds maximum-likelihood tolerances for the
multiplicative Gaussian kernel, using R's function optim.

```

```

# Poisson model takes only one parameter per predictor; others need the extra
scale parameter.

fit.kernel.optim=function(response,predictors,start,linkfunc="poisson",fitmethod
="Nelder-Mead",maxstep=10000)
{
  assign("counter",1,pos=1) # Creating counter here
  allows regular output from within likelihood function
  distmatrix=setupDist.kernelGauss(predictors) # Calculate distance matrix
  just once at the start (it never changes)
  maxdist=apply(distmatrix,1,max)

  if(length(start)==1)

  fit=optimize(f=llike.NPMR,interval=c(0,maxdist),y=response,dist=distmatrix,link=
linkfunc,maximum=TRUE)
  else

  fit=optim(par=start,fn=llike.NPMR,y=response,dist=distmatrix,link=linkfunc,contr
ol=list(fnscale=-1,maxit=maxstep),method=fitmethod)

  if(length(start)==1) bestpar=fit$maximum
  else bestpar=fit$par

  pred=kernelGauss(y=response,tolerance=bestpar,dist=distmatrix)

  return(list(fit=fit,prediction=pred))
}

# Function llike.NPMR.Gibbs is the same likelihood function, as in llike.NPMR,
but it has to be structured differently for use by the
# Gibbs sampler. The sampler tests one parameter at a time, and the parameter
being tested has to be submitted first (this is how
# the function metroplstep works).

# maxtolerance is the maximum allowed tolerance. I don't know whether this
matters, but tolerance for a predictor with no
# impact on the response can drift off to absurdly high number

llike.NPMR.Gibbs=function(test,other,whichtest,y,dist,maxtolerance,link="binom",
k=NULL)
{
  if(whichtest!="k")
  {
    tolerance=numeric(length(other)+1)
    tolerance[whichtest]=test
    tolerance[-whichtest]=other
  }
  else
  {
    k=test
    tolerance=other
  }

  if(length(tolerance[tolerance<=0])>0) return(-Inf) # All
parameters must be positive
  if(!is.null(k)) if(k<=0) return(-Inf)
  if(length(tolerance[tolerance>maxtolerance])>0) return(-Inf) # Disallow any
tolerance above maxtolerance

  pred=kernelGauss(y,tolerance,dist)

```

```

if(link=="binom" & length(pred[pred>=1])>0) return(-Inf)

if(link=="poisson") llike=dpois(y,lambda=pred,log=T)
else if(link=="binom") llike=dbinom(y,size=1,prob=pred,log=T) # Calculate log-
likelihood with R's density functions
else if(link=="negbinom" & !is.null(k)) llike=dnbinom(y,mu=pred,size=k,log=T)
else if(link=="normal" & !is.null(k)) llike=dnorm(y,mean=pred,sd=k,log=T)

totallike=sum(llike)
if(is.na(totallike)) return(-Inf)

return(totallike)
}

# Function fit.kernel.Gibbs uses Gibbs sampler to generate posterior
distributions of the parameters -- the Gaussian tolerances
# as well as negative binomial clumping parameter or normal SD. The response
vector (y above) is passed as the argument response,
# and the matrix of predictors as the argument predictors. The last 3 parameters
tell the Gibbs sampler how long to run (steps),
# which to use (after burn-in), and how frequently progress should be printed to
the screen (showstep).
# The predicted kernel can be saved every so often to get confidence on the
predictions, by setting savestep (savestep=100 means
# save every 100th step)

# The kernel has to be calculated once for every Gibbs step, for each parameter.
To save the kernel at every step adds one more
# calculation. With 3 predictors, the negative binomial k parameter, and saving
the kernel at each step is 5 calculations. To run
# 4000 Gibbs steps thus requires 20,000 kernel calculation. Each kernel
calculation requires a normal density at every distance,
# which is the square of the number of points in the data.

# fit.kernel.Gibbs starts with the distance matrix. So
fit.kernel.Gibbs.predictors starts with the predictors themselves and calculates
# distance matrix.

fit.kernel.Gibbs.predictors=function(response,predictors,start,linkfunc="binom",
savestep=NULL,steps=4500,burnin=500,showstep=250)
{
  distmatrix=setupDist.kernelGauss(predictors)

  fit=fit.kernel.Gibbs(response=response,distmatrix=distmatrix,start=start,linkfun
c=linkfunc,savestep=savestep,steps=steps,burnin=burnin,showstep=showstep)

  return(fit)
}

fit.kernel.Gibbs=function(response,distmatrix,start,linkfunc="binom",savestep=NU
LL,steps=4000,burnin=500,showstep=100)
{
  notoler=dim(distmatrix)[1]
  noparam=length(start)

  tolerance=matrix(nrow=steps,ncol=notoler)
  tolerance[1,]=start[1:notoler]
  accept=rep(0,notoler)

  k=numeric()
  if(linkfunc!="poisson" & linkfunc!="binom") k[1]=start[noparam]

```

```

else k=1

scale=tolerance[1,]
kscale=.5
accept=rep(0,notoler)
kaccept=0

maxdist=apply(distmatrix,1,max)

like=numeric()
prediction=matrix(nrow=steps,ncol=length(response))

like[1]=llike.NPMR.Gibbs(tolerance[1,1],tolerance[1,-
1],whichtest=1,y=response,dist=distmatrix,link=linkfunc,k=k[1],maxtolerance=5*ma
xdist)
cat("step 1: ",round(tolerance[1,],2),round(k[1],3),"--
",round(scale,2),round(kscale,2),"--",round(accept,2),round(kaccept,2),"--
",round(like[1],1),"\n")

for(i in 2:steps)                                # Loop through the Gibbs sampler
{
  for(j in 1:notoler)                             # Loop through the tolerance parameters,
updating one at a time
  {
    testparam=tolerance[i-1,]
    if(j>1) testparam[1:(j-1)]=tolerance[i,1:(j-1)]

metropResult=metrop1step(func=llike.NPMR.Gibbs,start.param=testparam[j],scale.pa
ram=scale[j],adjust=1.02,target=0.25,other=testparam[-j],whichtest=j,
k=k[i-
1],y=response,dist=distmatrix,link=linkfunc,maxtolerance=5*maxdist)
# Update each tolerance parameter

    tolerance[i,j]=metropResult[1]
    scale[j]=metropResult[2]
    accept[j]=accept[j]+metropResult[3]          # Keep track of acceptance rate,
which will converge on target=0.25
  }

  if(linkfunc!="poisson" & linkfunc!="binom")
  {
    metropResult=metrop1step(func=llike.NPMR.Gibbs,start.param=k[i-
1],scale.param=kscale,adjust=1.02,target=0.25,other=tolerance[i,],whichtest="k",
y=response,dist=distmatrix,link=linkfunc,maxtolerance=5*maxdist)
# Update the additional parameter, k (clumping parameter of
negative binomial or normal SD)

    k[i]=metropResult[1]
    kscale=metropResult[2]
    kaccept=kaccept+metropResult[3]
  }
else k[i]=1

# browser()
like[i]=metropResult[4]
if(i%showstep==0) cat("step", i,": ",round(tolerance[i,],2),round(k[i],3),"-
-",round(scale,2),round(kscale,2),"--",
round(accept,2)/(i-1),round(kaccept,2)/(i-1),"--
",round(like[i],1),"\n")
# output to screen every
showstep steps

```

```

    if(!is.null(savestep))
      if(i%%savestep==0)
prediction[i,]=kernelGauss(response,tolerance[i,],distmatrix) # save predicted
kernel every savestep steps
  }

# browser()
  tolerance=as.matrix(tolerance[-(1:burnin),])
  meantoler=colMeans(tolerance) # Calculate various
descriptions of the Gibbs chain
  meank=mean(k[-(1:burnin)])

  mediantoler=apply(tolerance,2,median)
  mediank=median(k[-(1:burnin)])

  CIToler=apply(tolerance,2,quantile,prob=c(.025,.975))
  CIk=quantile(k[-(1:burnin)],prob=c(.025,.975))

  best=kernelGauss(response,meantoler,distmatrix) # Best-fit
kernel's prediction

  prediction=prediction[-(1:burnin),]
  include=which(!is.na(prediction[,1]))
  prediction=prediction[include,]
  lower=apply(prediction,2,quantile,prob=.025) # Prediction
interval at each point
  upper=apply(prediction,2,quantile,prob=.975)

# browser()
  return(list(fulltoler=tolerance,fullk=k[-
(1:burnin)],tolerance=meantoler,CITolerance=CIToler,k=meank,CIk=CIk,
      mediantolerance=mediantoler,mediank=mediank,like=like[-
(1:burnin)],bestpred=best,lowerPred=lower,upperPred=upper,
      predictions=prediction))
}

# Function vectMult calculates product of two vectors, producing a 3rd vector of
same length. Used inside apply in function kernelGauss.
# R's function prod might do this?

vectMult=function(v1,v2) return(v1*v2)

# Metropolis algorithm used in the Gibbs sampler.
# Adjusting the scale parameter to achieve a target acceptance rate is H.
Muller-Landau's trick

# Takes a single metropolis step on a single parameter for any given likelihood
function. The likelihood function
# is passed as the argument func.
# The arguments start.param and scale.param are atomic (single values), as are
adjust and target.
# The ellipses handle all other arguments to the likelihood function. The
function func must accept the test
# parameter as the first argument, plus any additional arguments which come as
the ellipses.

# Note the metropolis rule: if rejected, the old value is returned to be re-
used. The return value

```

```

# includes a one if accepted, zero if rejected, and also the likelihood at the
# final parameter value.

# The step size, referred to as scale.param, is adjusted following Helene's rule:
# For every acceptance, scale.param is multiplied
# by adjust, which is a small number > 1 (1.01, 1.02, 1.1 all seem to work). For
# every rejection, scale.param
# is multiplied by (1/adjust) raised to a power (AdjExp) that is based on the
# target acceptance rate.
# When the target acceptance rate is 0.25, which is recommended for any model
# with > 4 parameters,
# AdjExp=3. It's easy to see how this system arrives at an equilibrium
# acceptance rate=target.

# The program calling metropolstep has to keep track of the scaling parameter:
# submitting it each time
# metropolstep is called, and saving the adjusted value for the next call. Given
# many parameters, a
# scale must be stored separately for every one.

# The return value is a vector of 4: first the new parameter value, second the
# new scale (step size),
# third a zero or a one to keep track of the acceptance rate, and finally the
# likelihood.

# metropolstep=function(func,start.param,scale.param,adjust,target,...)
# {
#   origlike=func(start.param,...)
#   newval=rnorm(1,mean=start.param,sd=scale.param)
#   newlike=func(newval,...)
#   AdjExp=(1-target)/target
#   likeratio=exp(newlike-origlike)
#   if(runif(1)<likeratio)
#     {
#       newscale=scale.param*adjust^AdjExp
#       return(c(newval,newscale,1,newlike))
#     }
#   else
#     {
#       newscale=scale.param*(1/adjust)
#       return(c(start.param,newscale,0,origlike))
#     }
# }

#### Graphing output of NPRM fit ####
# Requires the predictors and observed (=response), the link, and output, which
# is what fit.kernel.Gibbs produces.
# If CI==TRUE, confidence intervals are added to the prediction. If
# limits==TRUE, intervals for all observed data
# are also graphed.
# Whichgraph indicates which of the predictors is graphed. It must be a number
# <= the number of predictors.
# Output is a graph of the observed, along with prediction, as a function of the
# one predictor selected.

graph.NPMR=function(predictors,observed,whichgraph,output,link="poisson",xlabel=
"x",CI=TRUE,limits=TRUE)
{

```

```
x=predictors[,whichgraph]

if(link=="poisson")
{
  upper=qpois(.975,lambda=output$bestpred)
  lower=qpois(.025,lambda=output$bestpred)
}
else if(link=="negbinom")
{
  upper=qnbinom(.975,mu=output$bestpred,size=output$k)
  lower=qnbinom(.025,mu=output$bestpred,size=output$k)
}
else if(link=="normal")
{
  upper=qnorm(.975,mean=output$bestpred,sd=output$k)
  lower=qnorm(.025,mean=output$bestpred,sd=output$k)
}

if(limits) yupper=max(c(upper,observed,output$bestpred))
else yupper=max(c(observed,output$bestpred))

plot(x,observed,ylim=c(0,yupper),xlab=xlabel)

ord=order(x)
if(limits) lines(x[ord],upper[ord],col="gray",cex=.75,pch=16)
if(limits) lines(x[ord],lower[ord],col="gray",cex=.75,pch=16)

points(x,output$bestpred,col="blue",pch=16)
if(CI) segments(x,output$lowerPred,x,output$upperPred,col="red")
points(x,observed)

abline(lm(observed~x))
}
```
