# Supplementary figures and images for: Drought sensitivity shapes species distribution patterns in tropical forests
Source: Springer Nature journal article supplement (doi:10.1038/nature05747), 2007-05-01

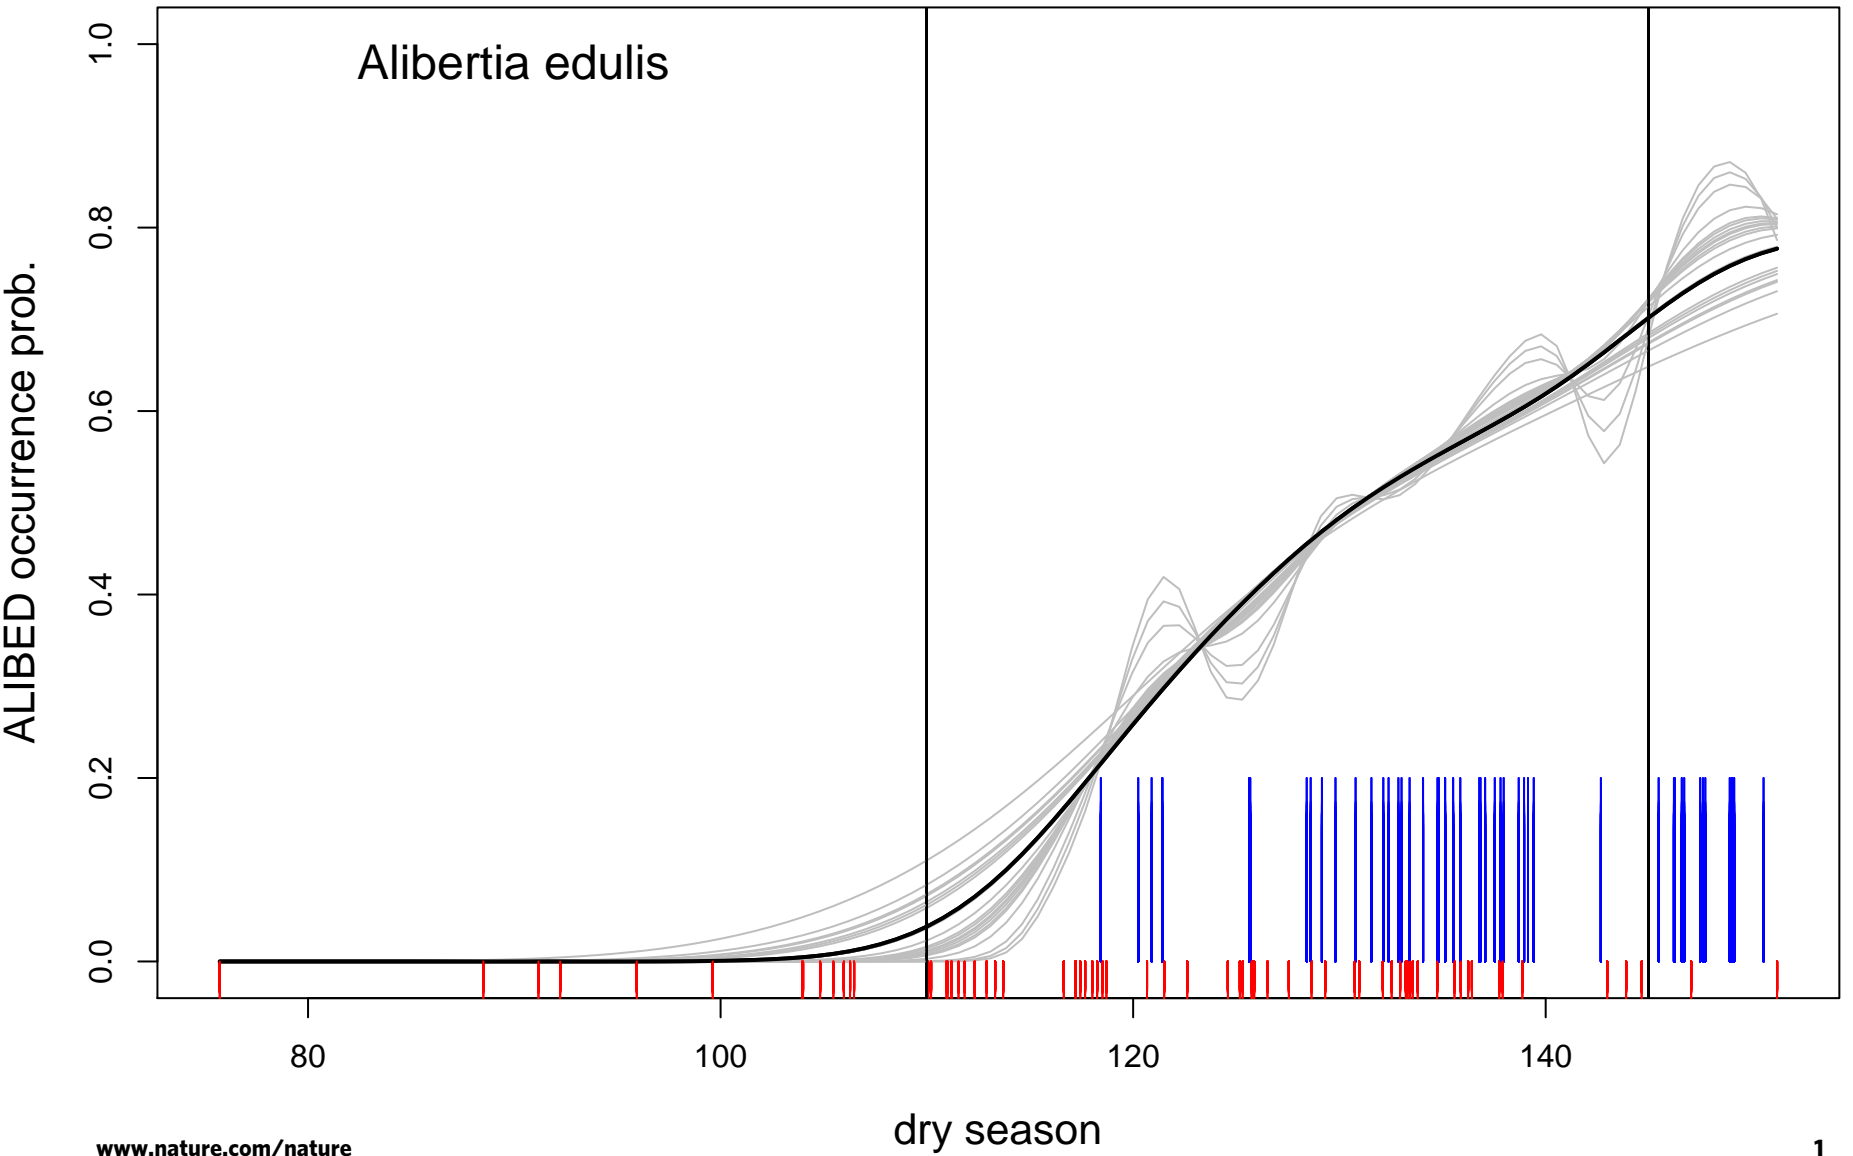

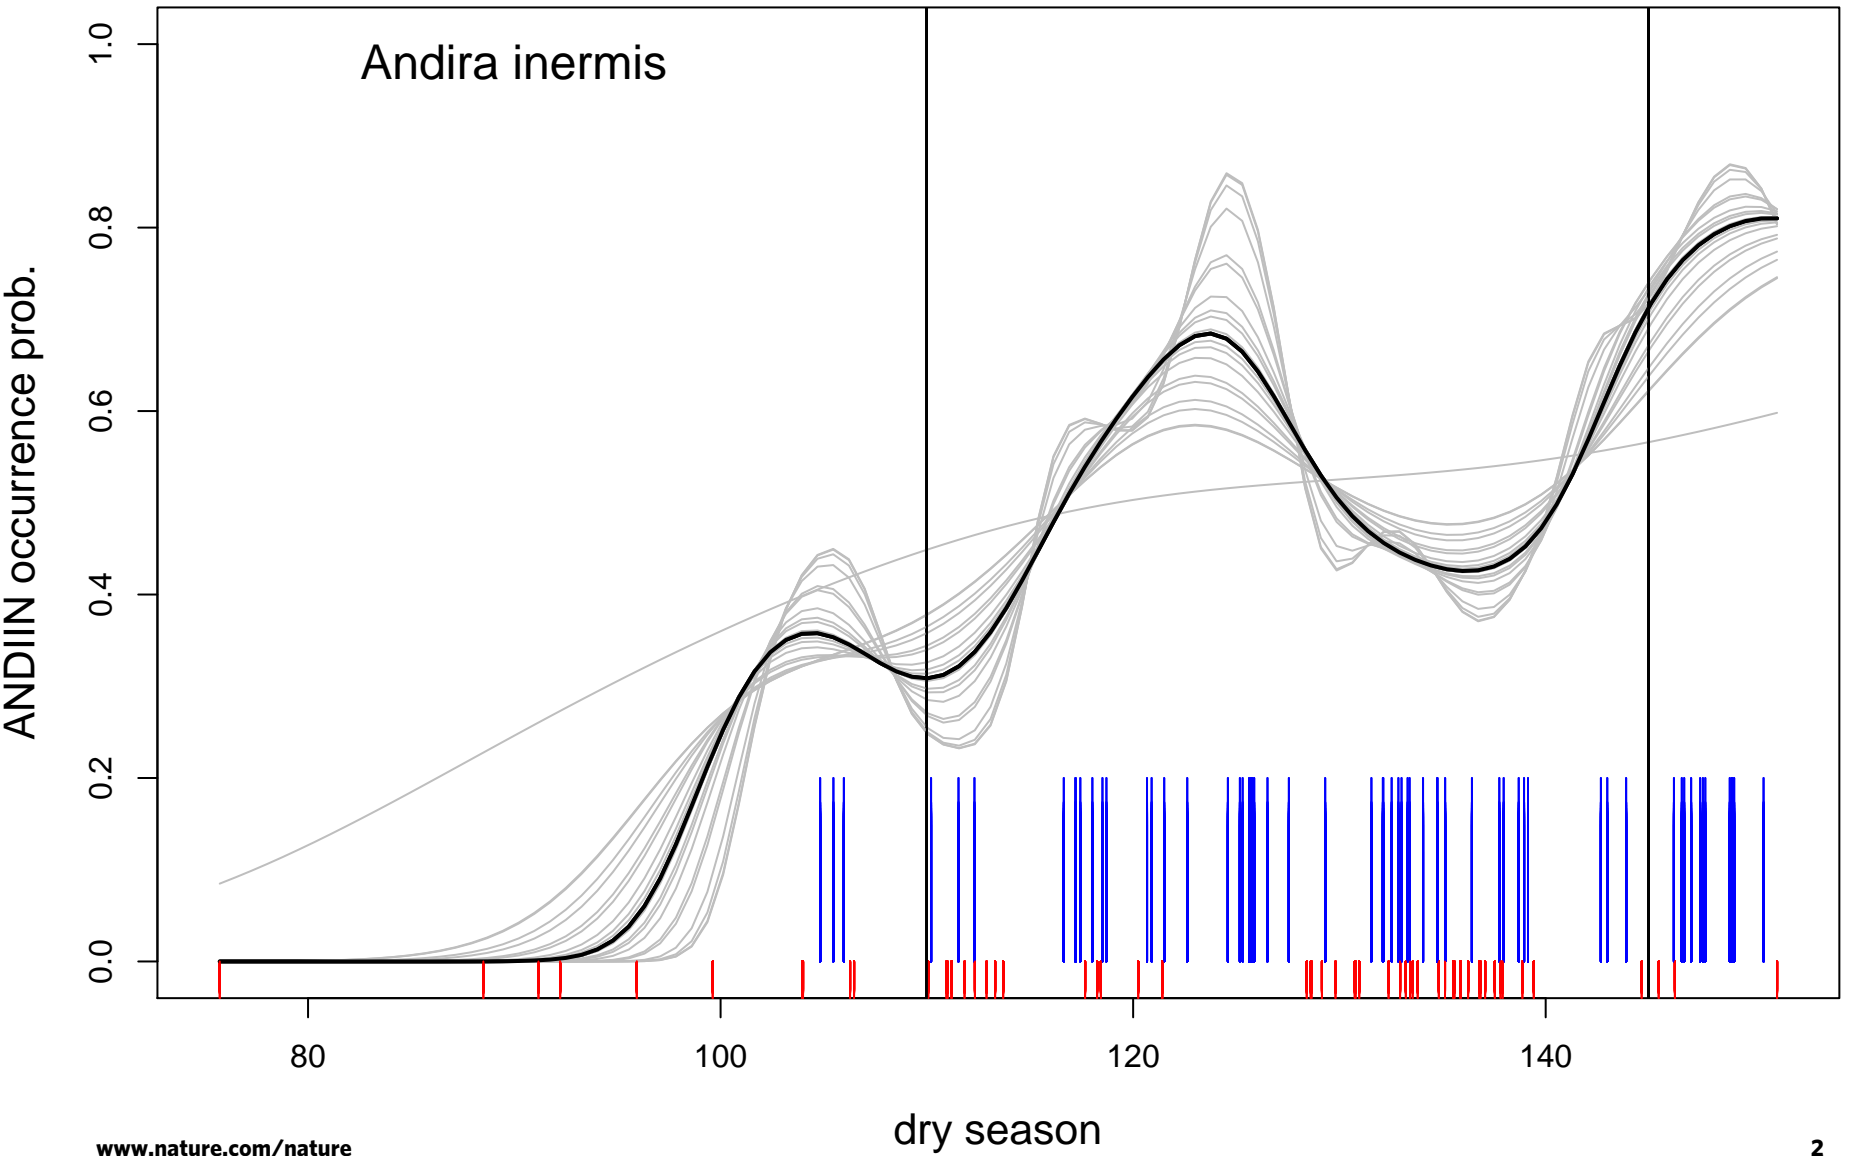

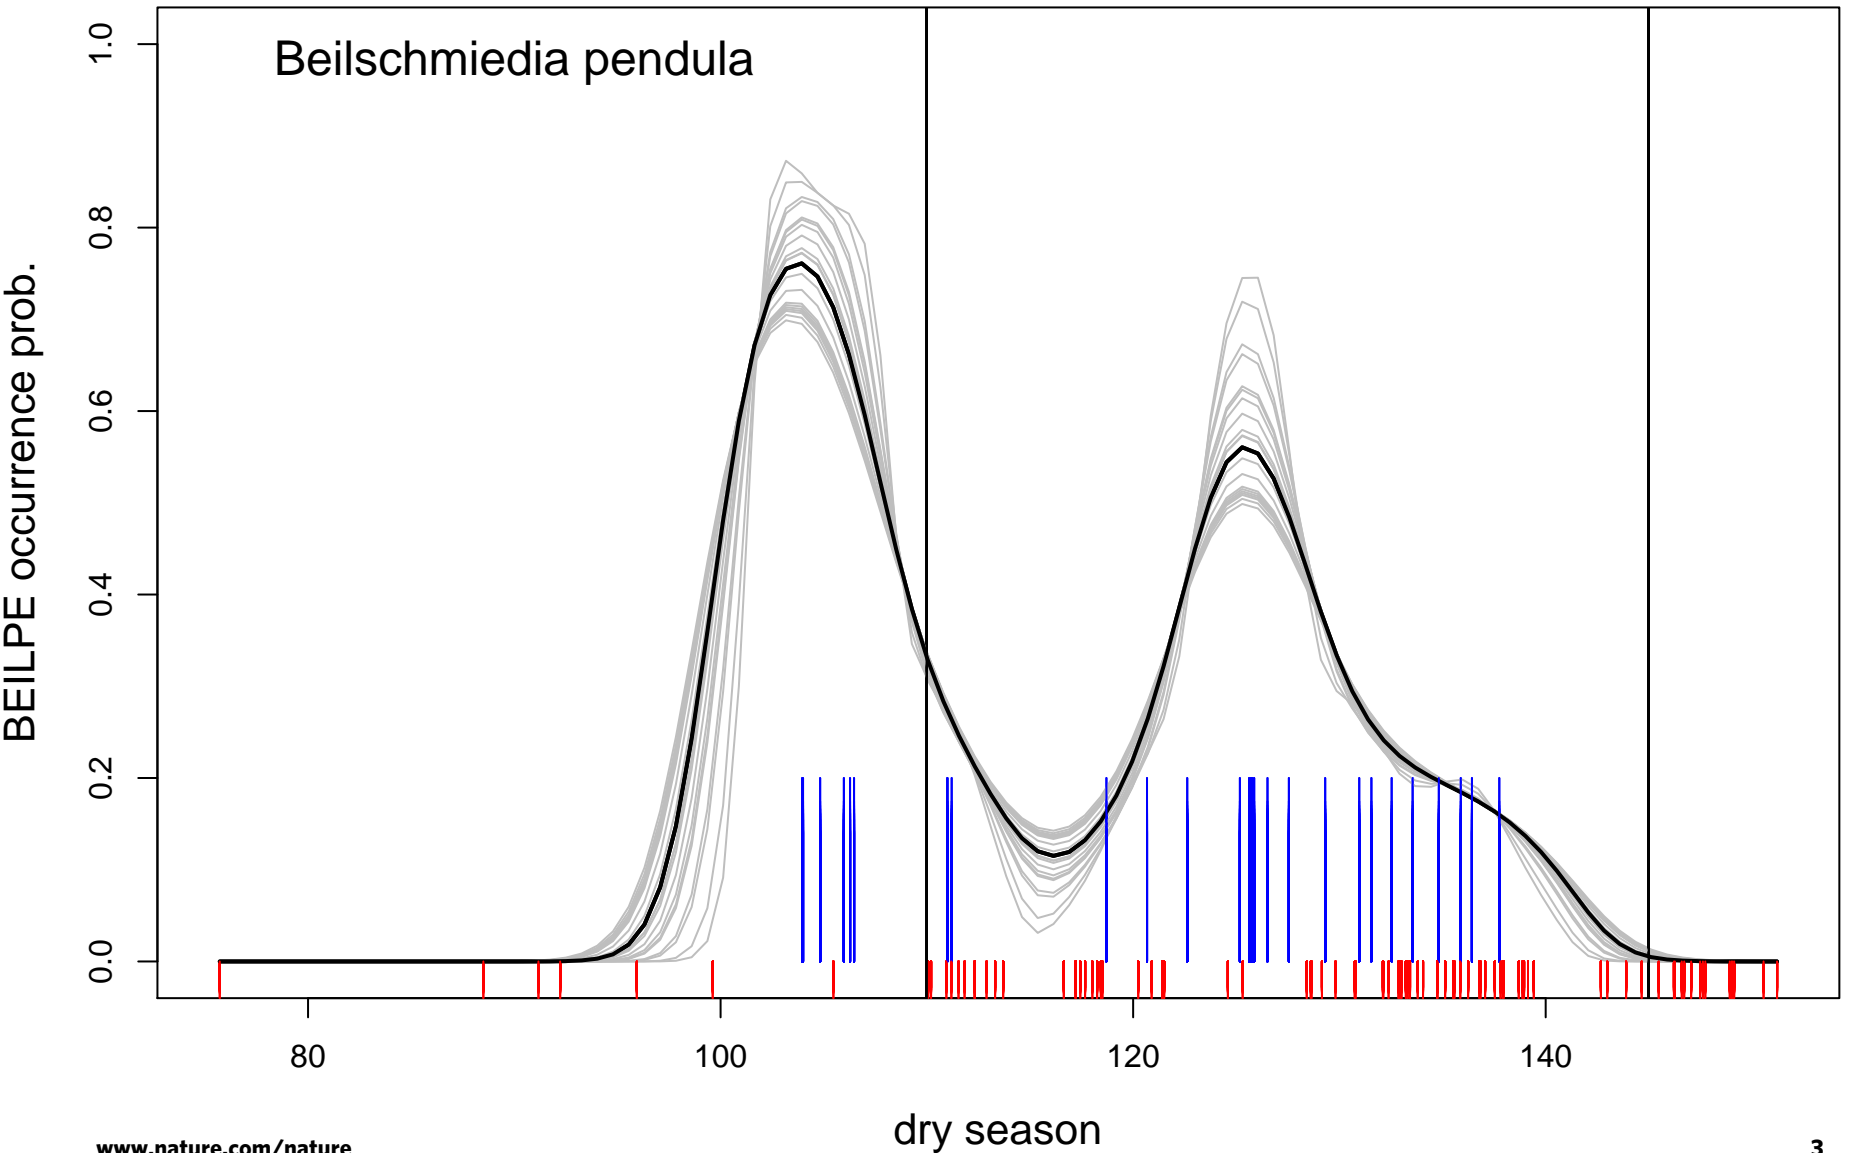

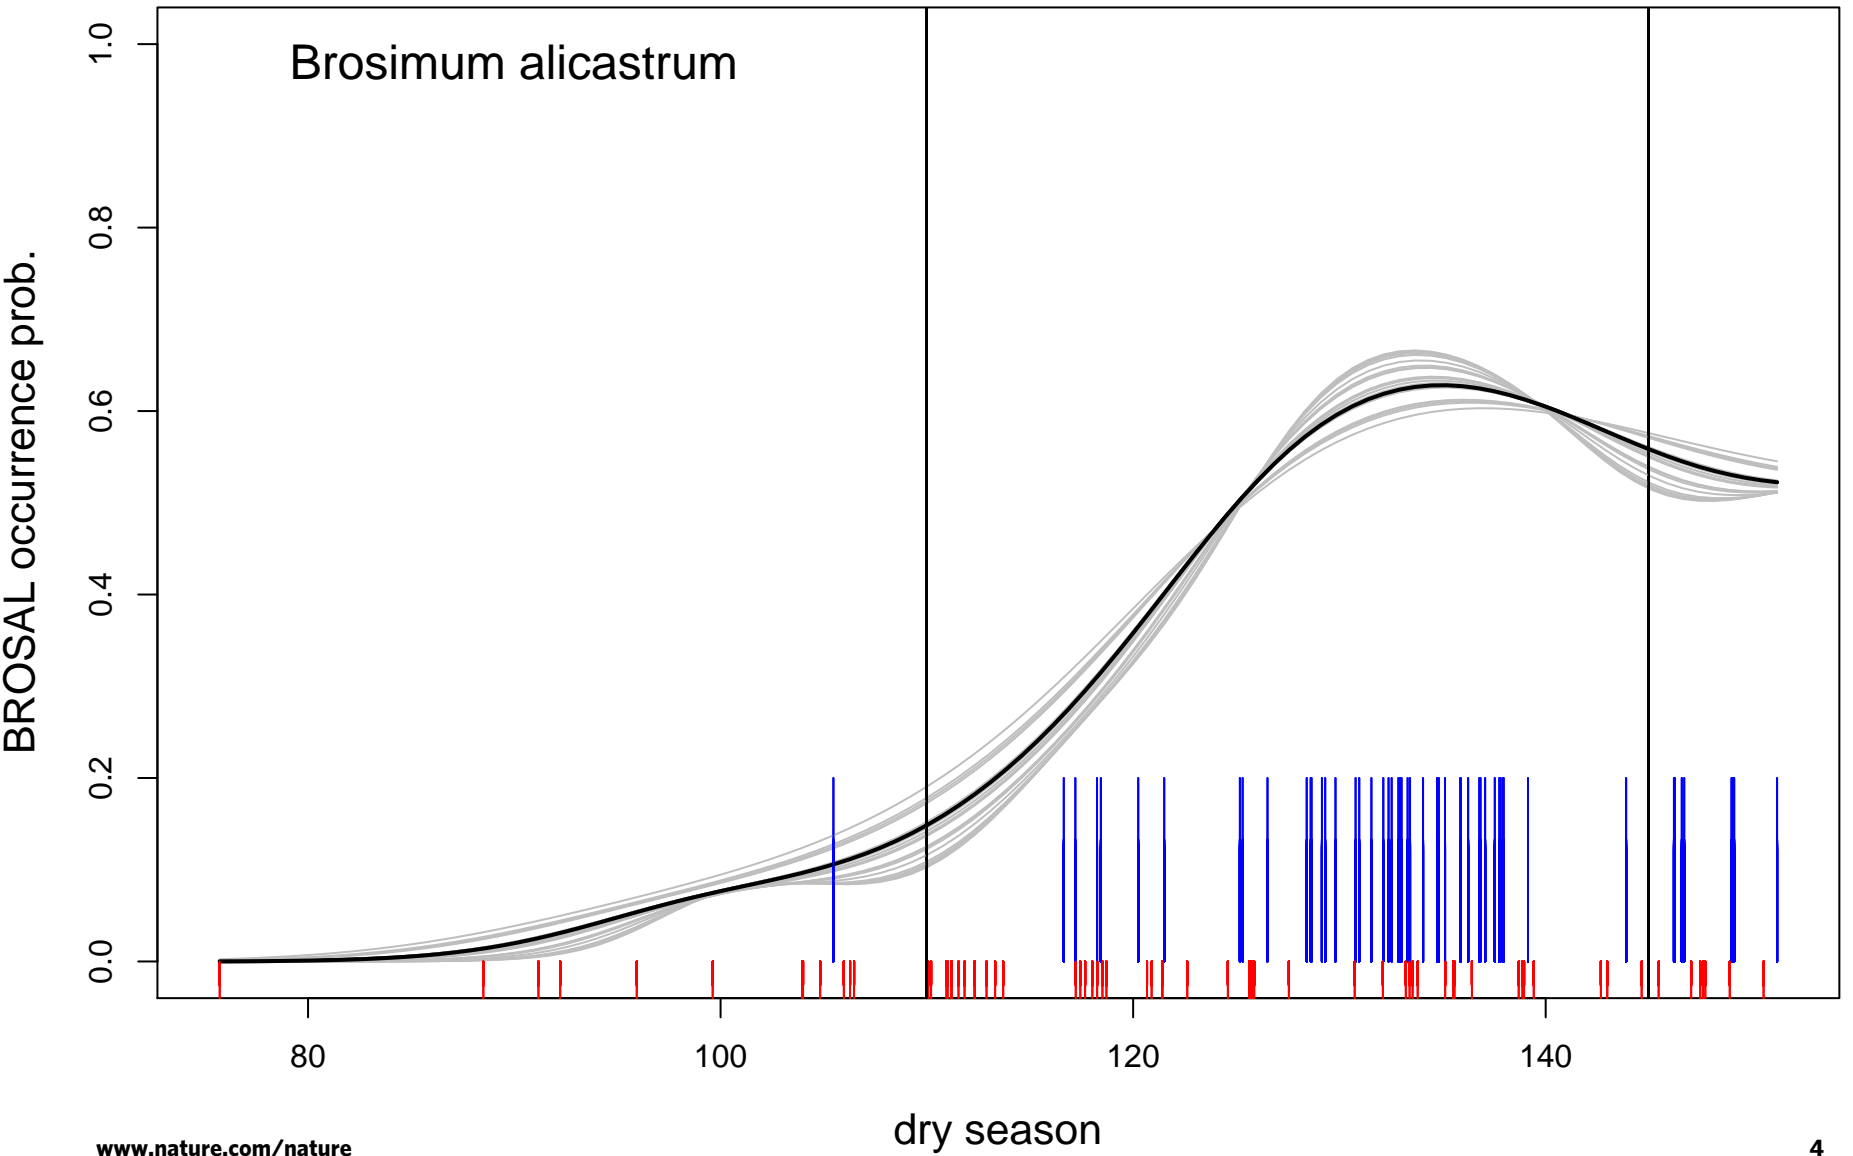

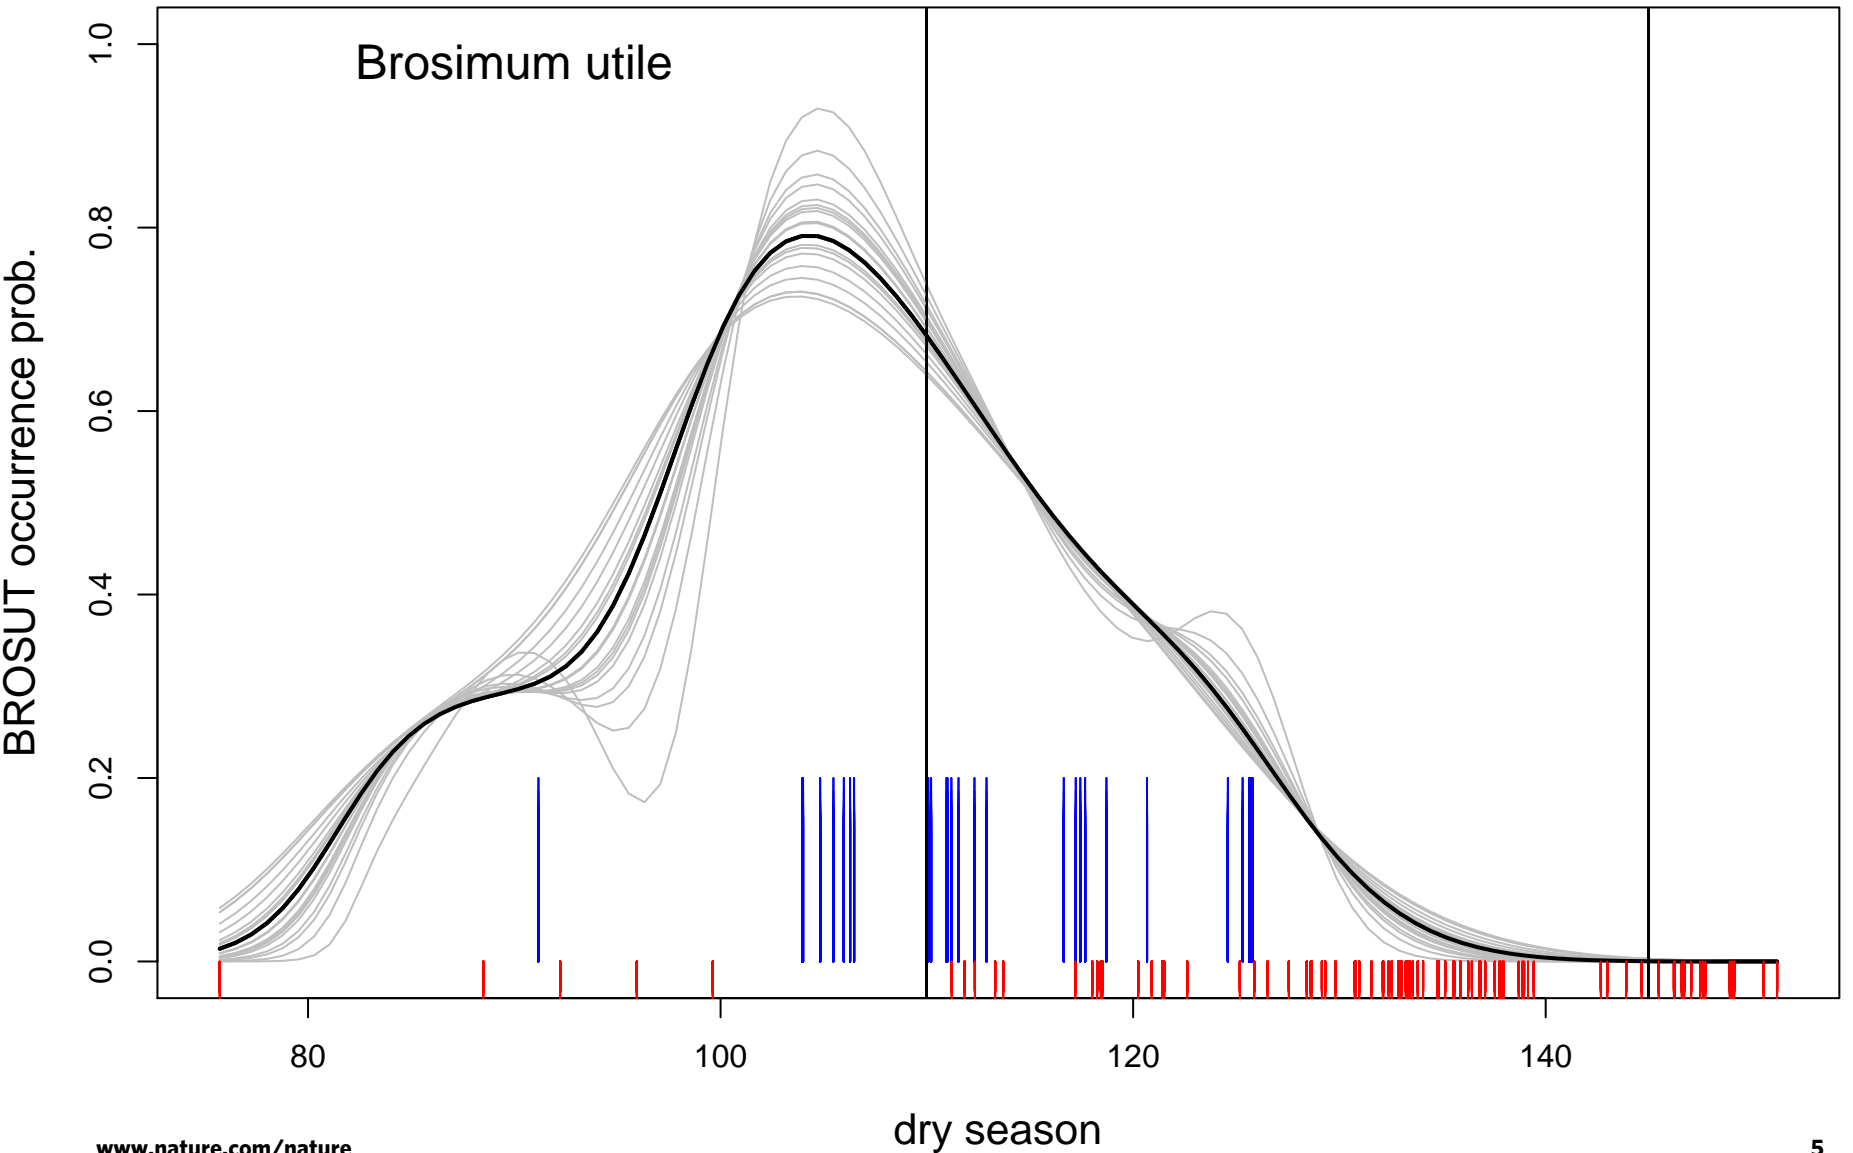

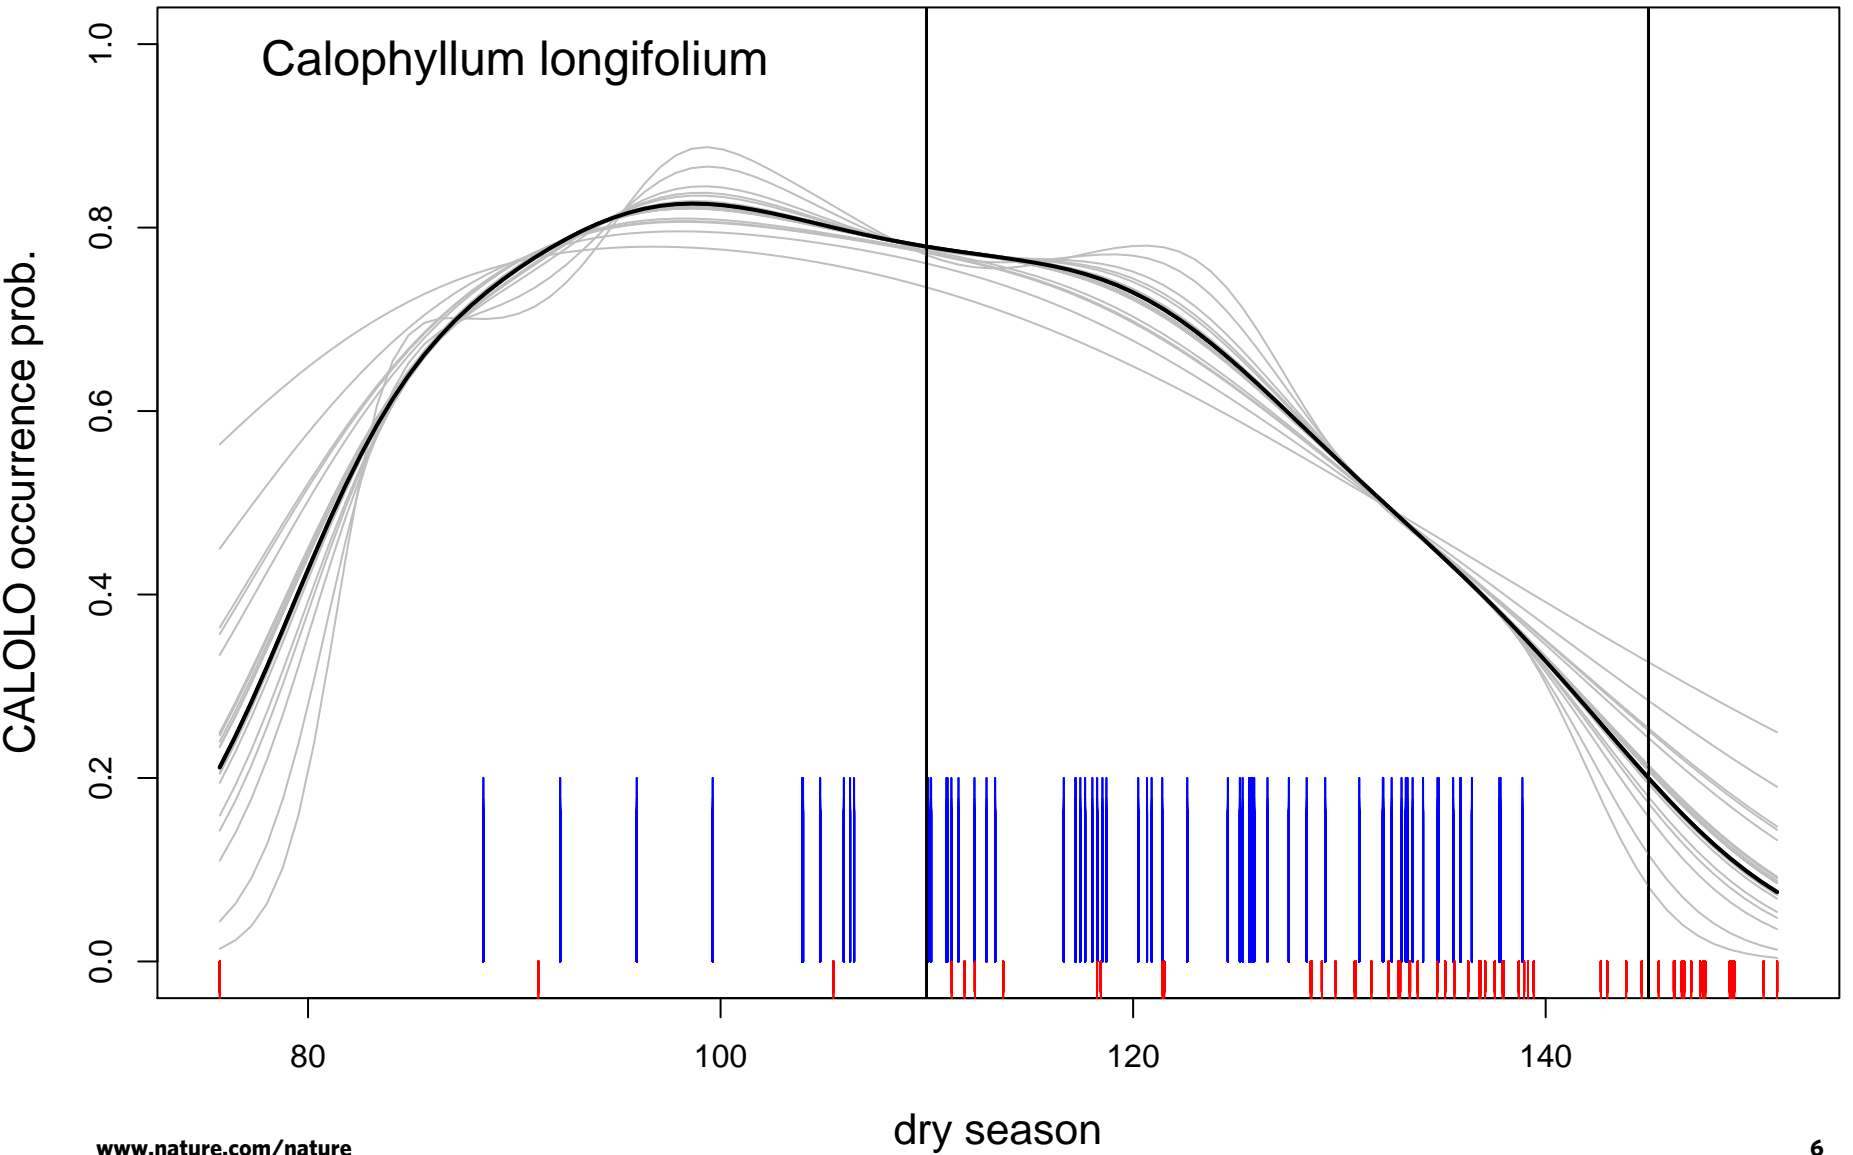

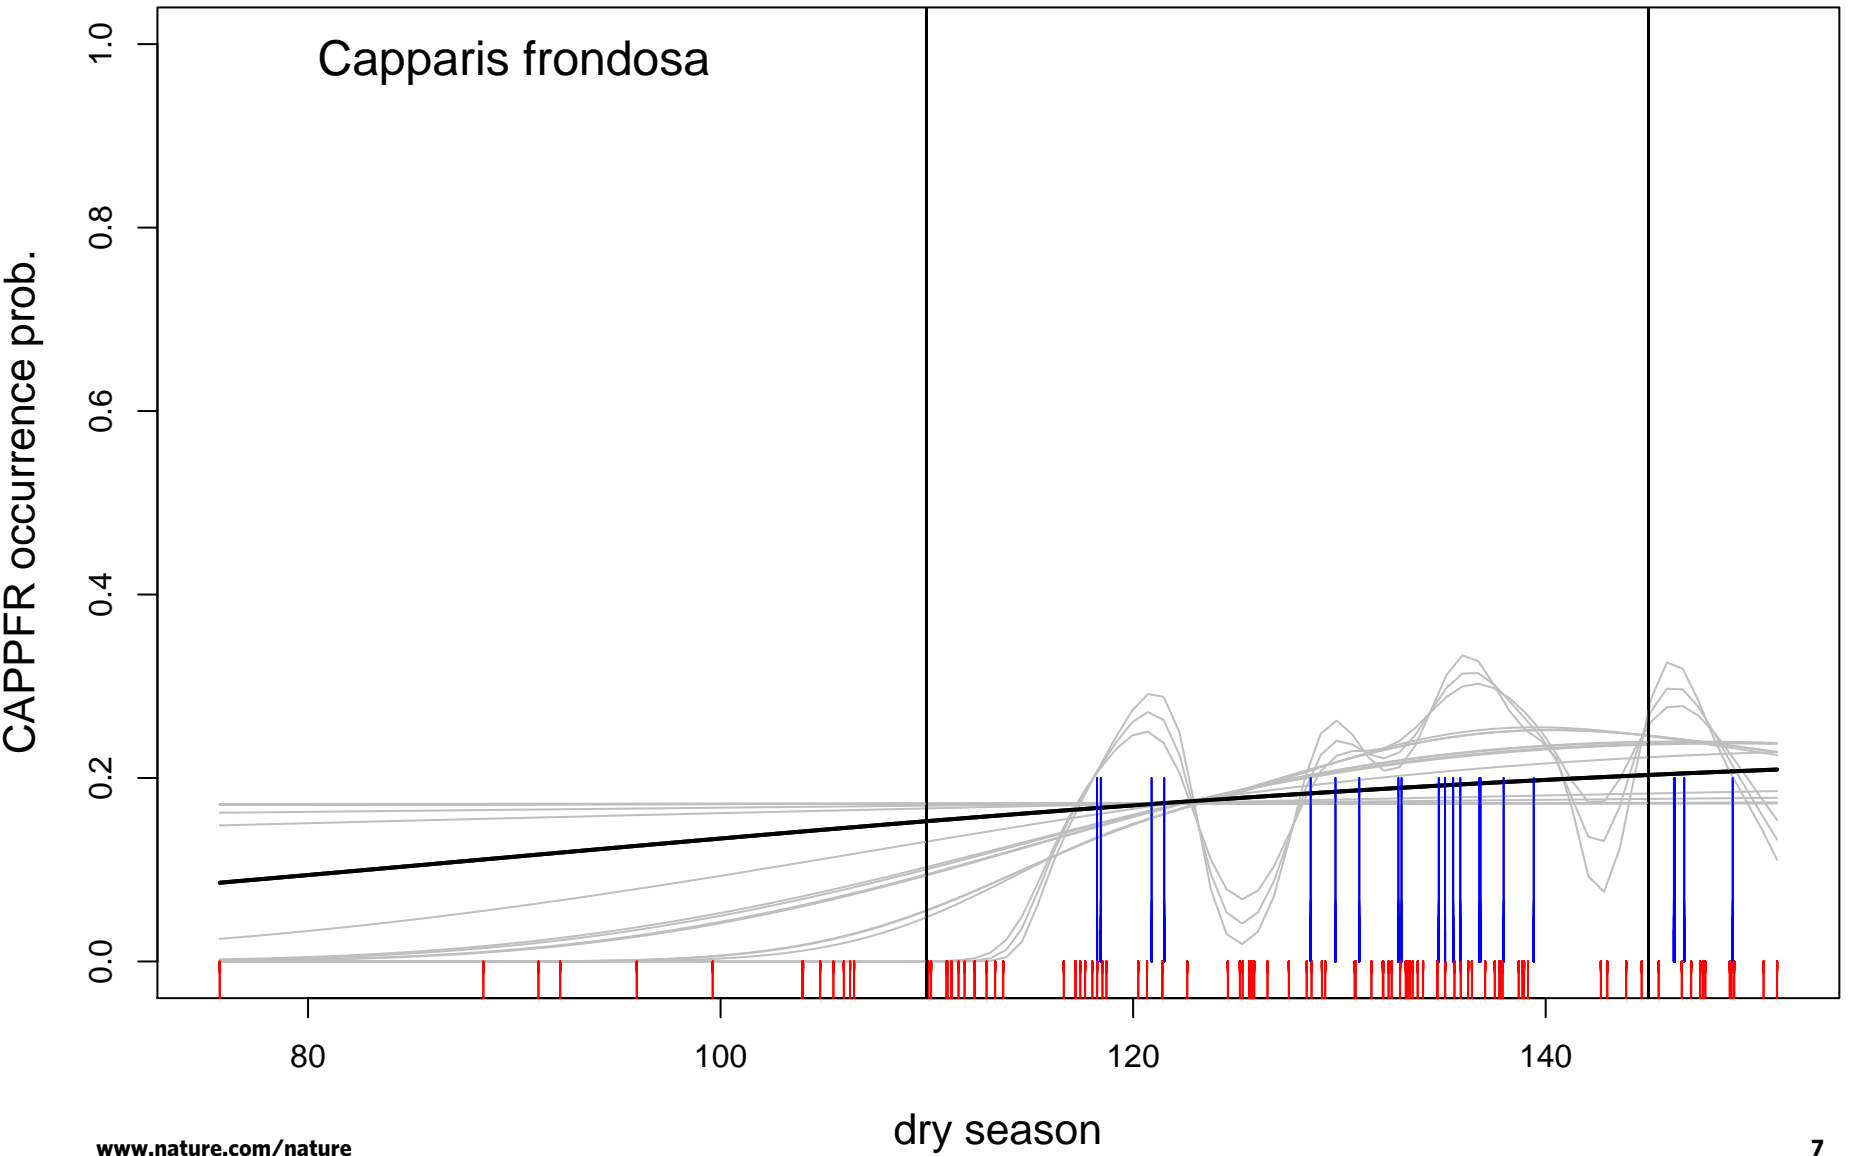

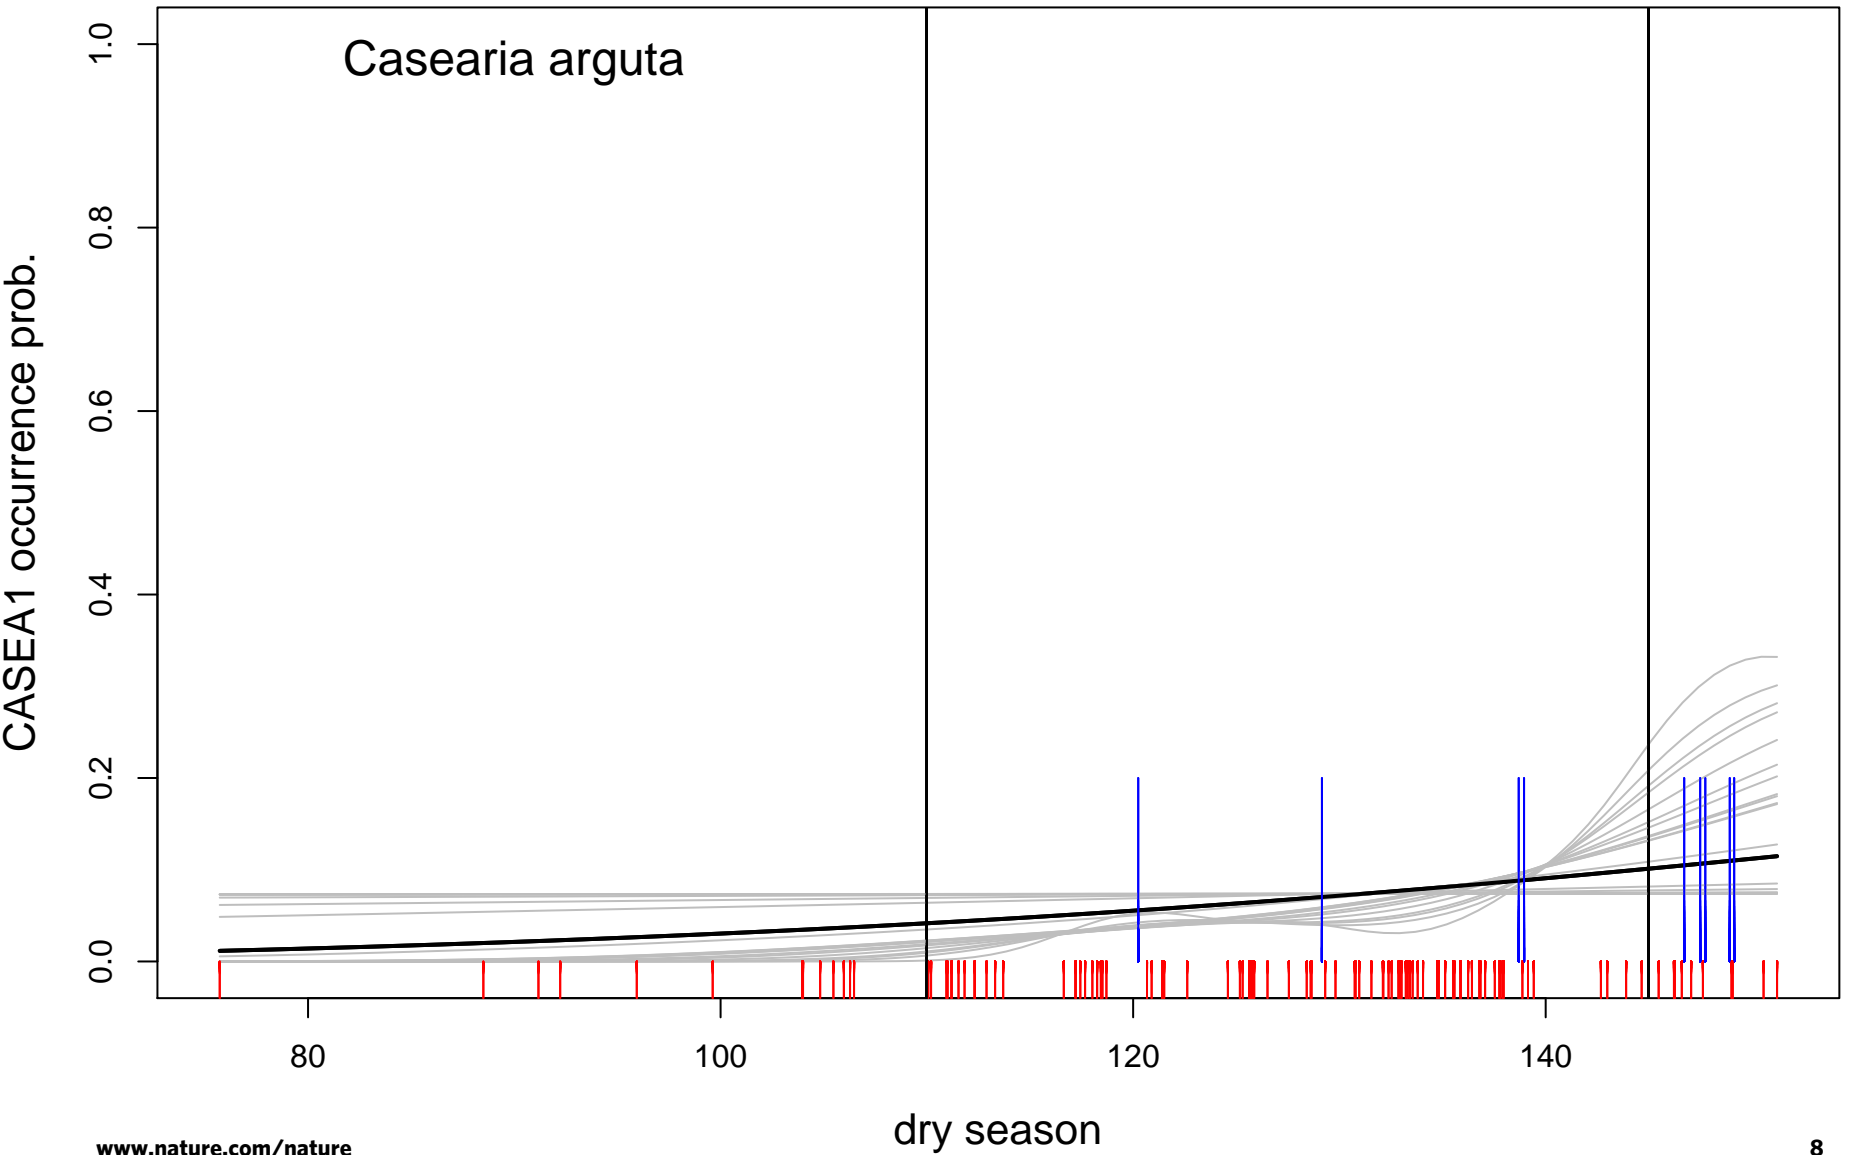



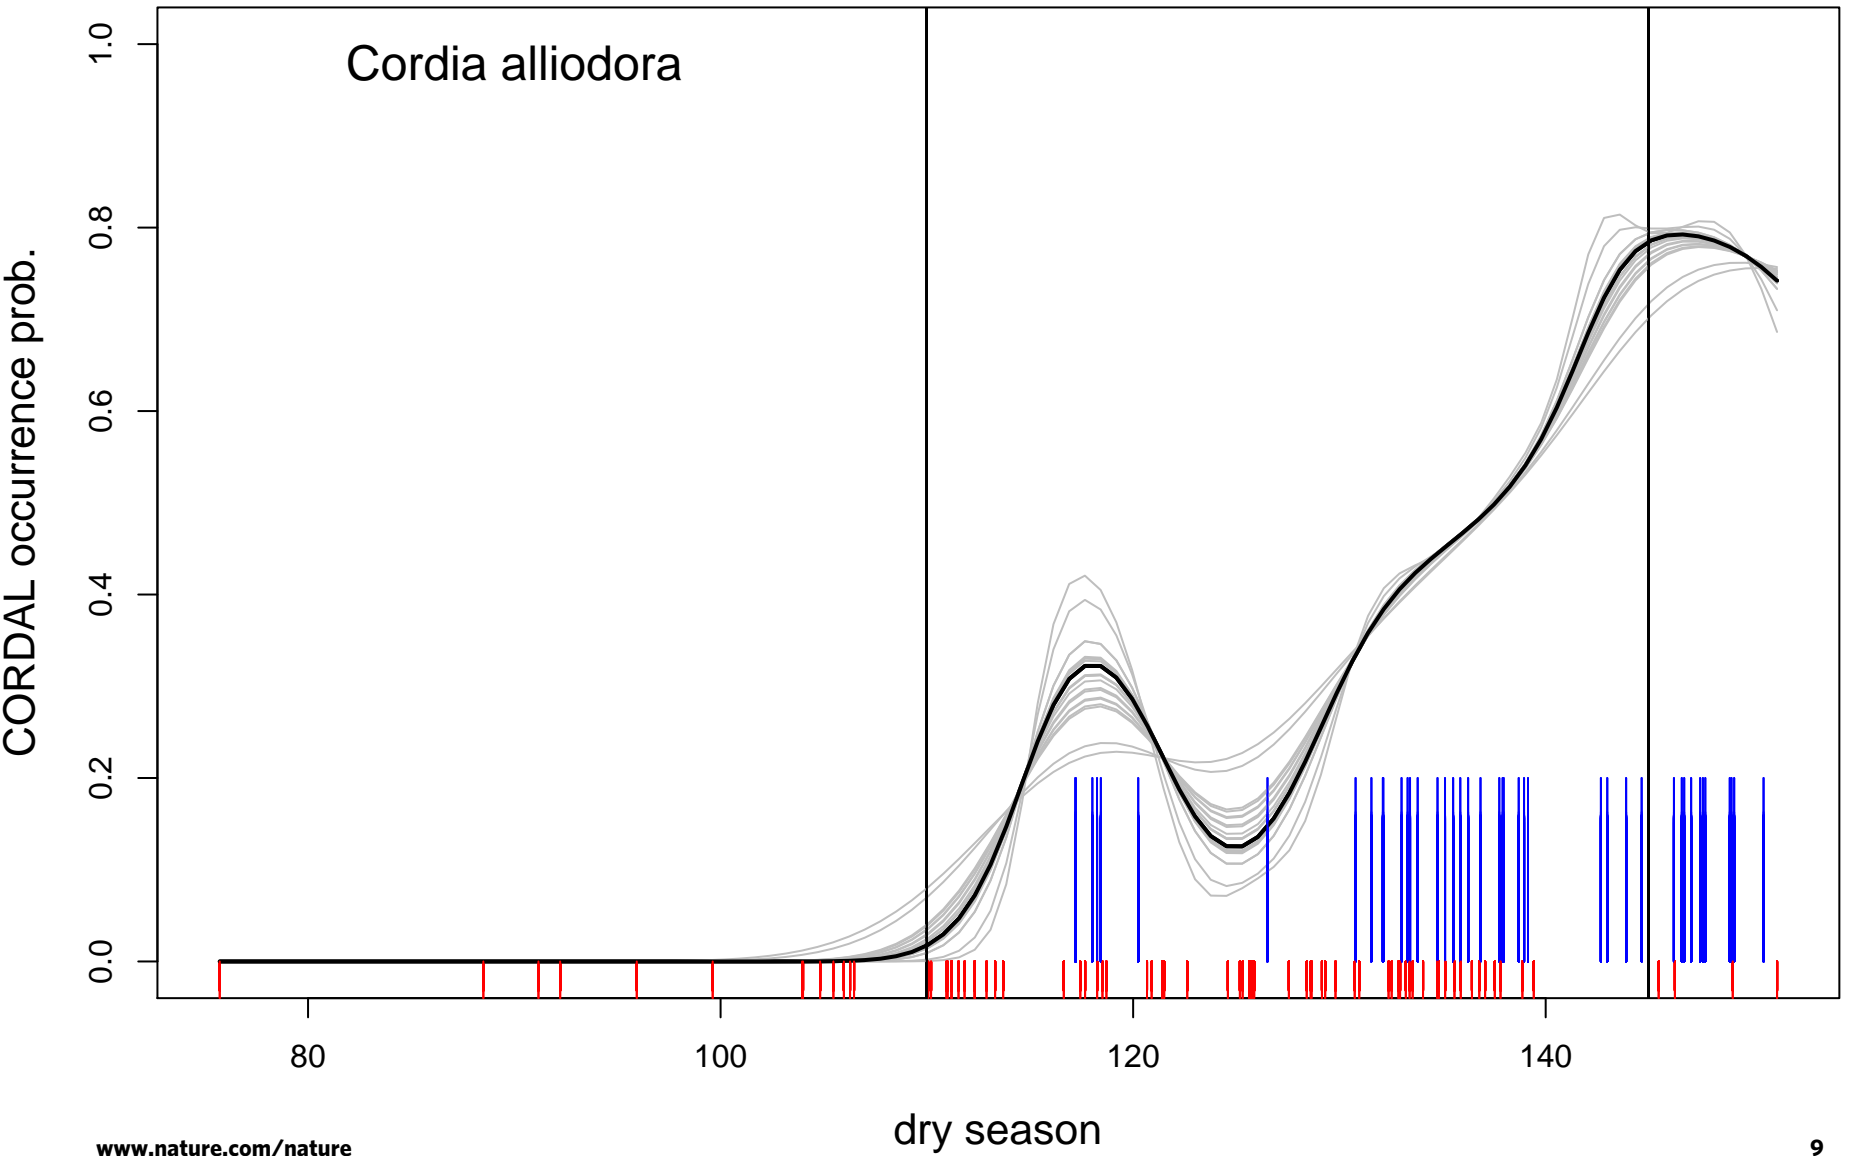

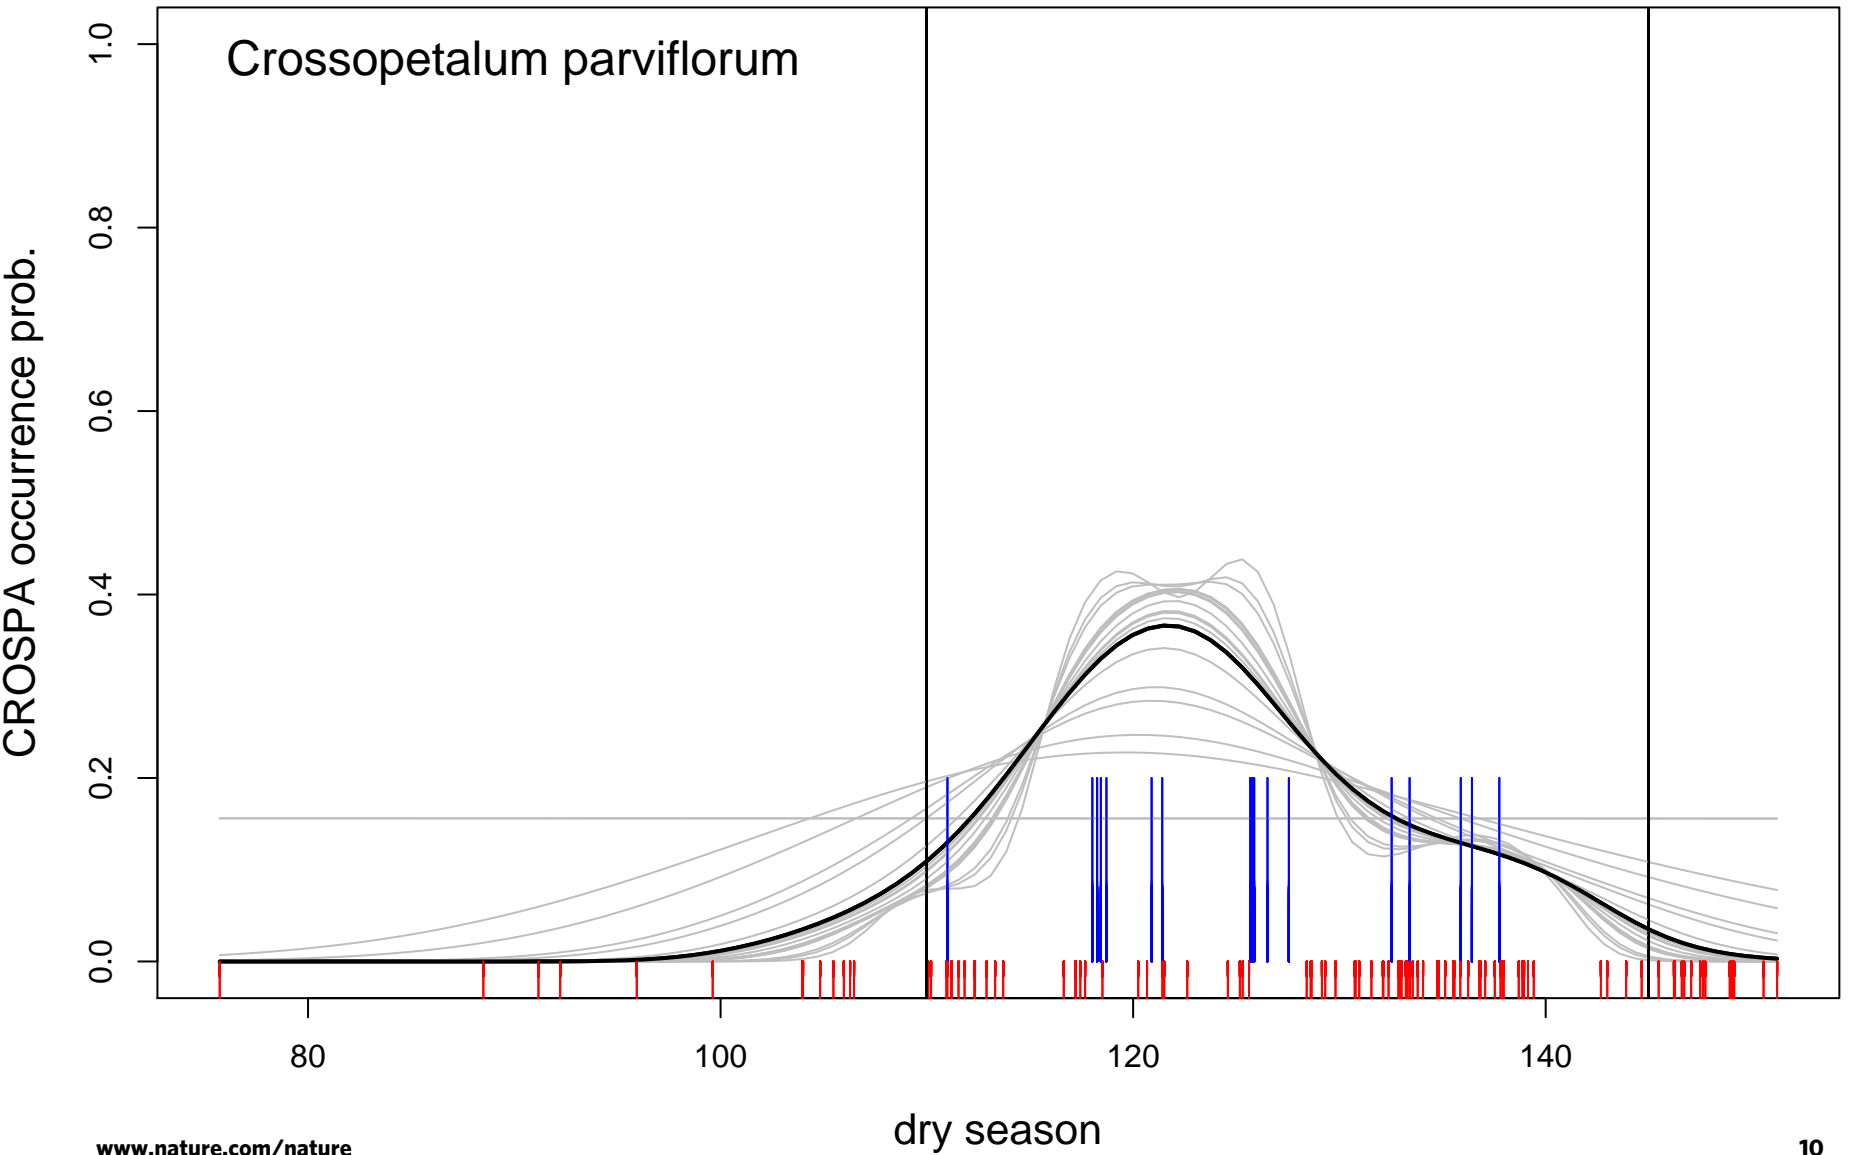

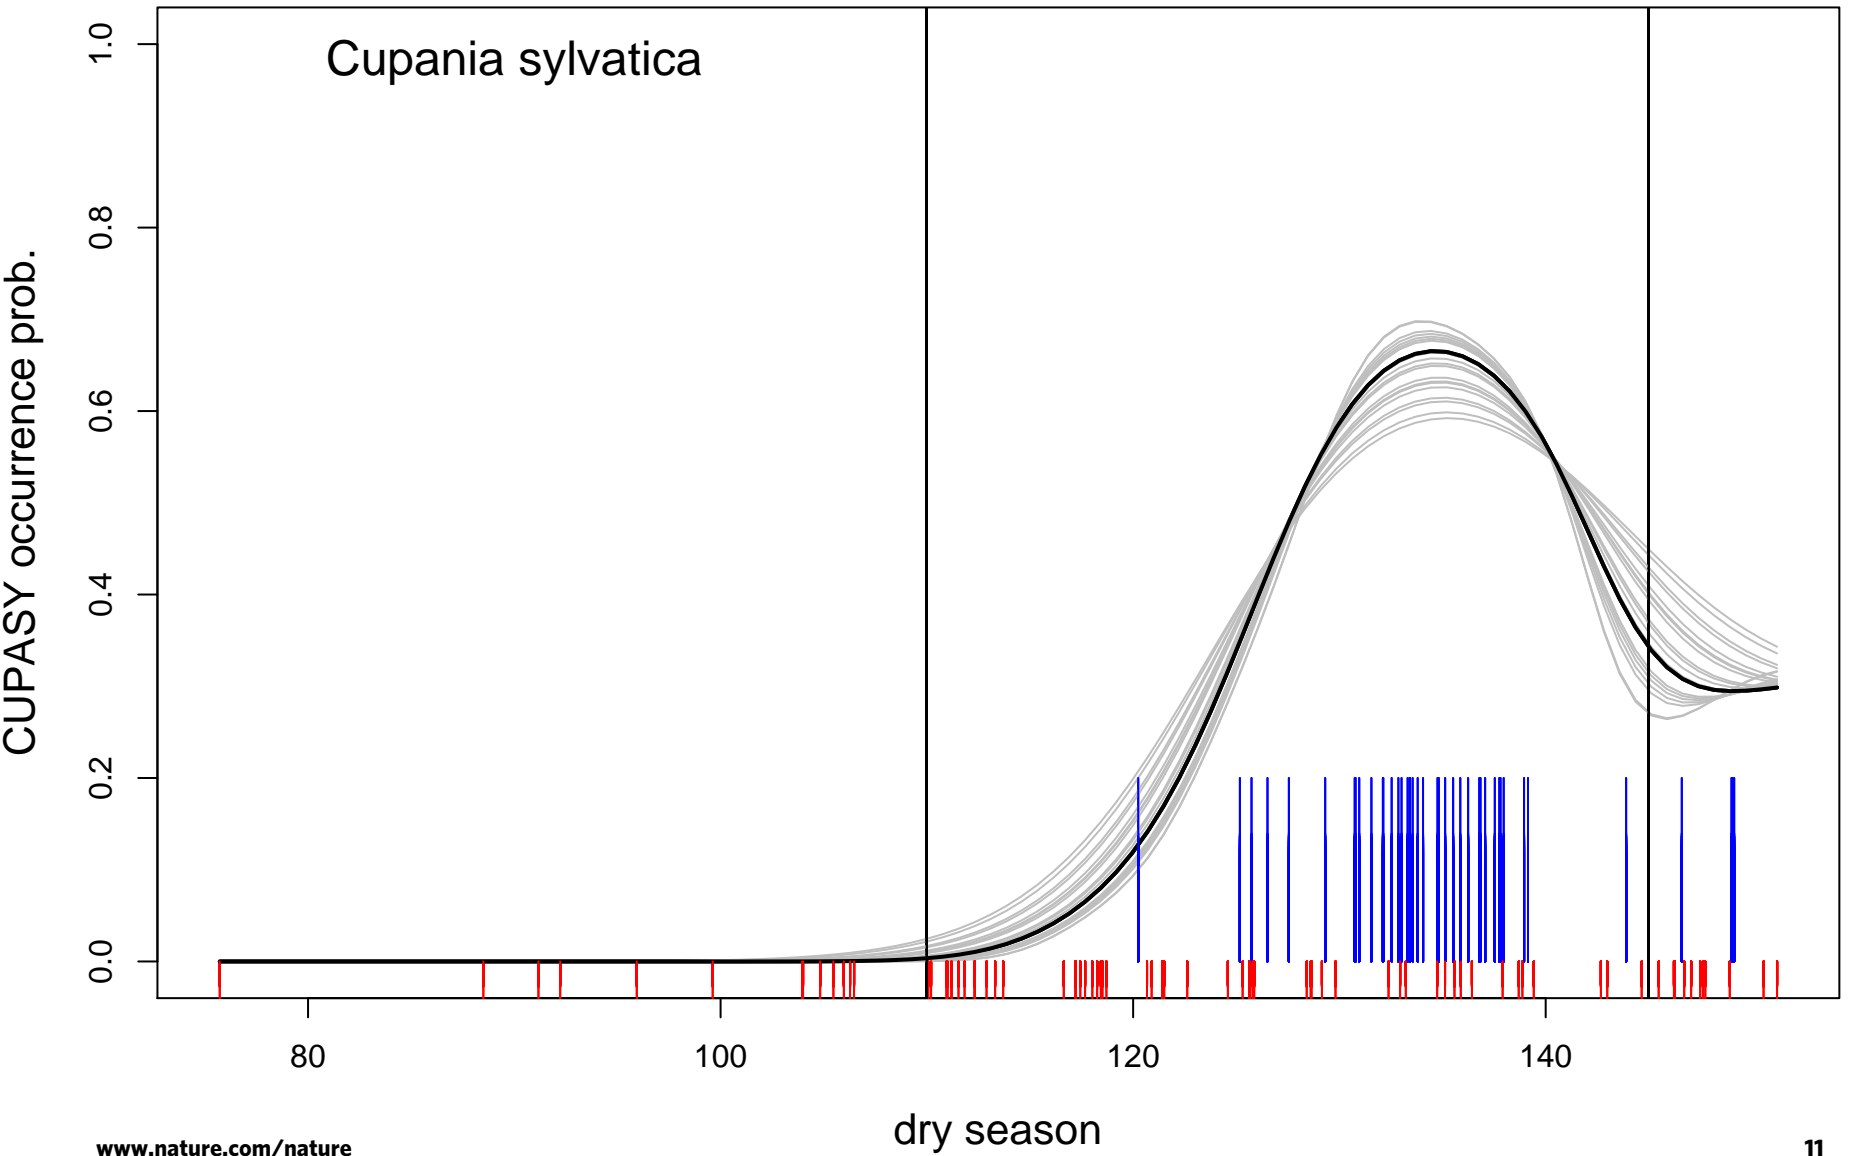

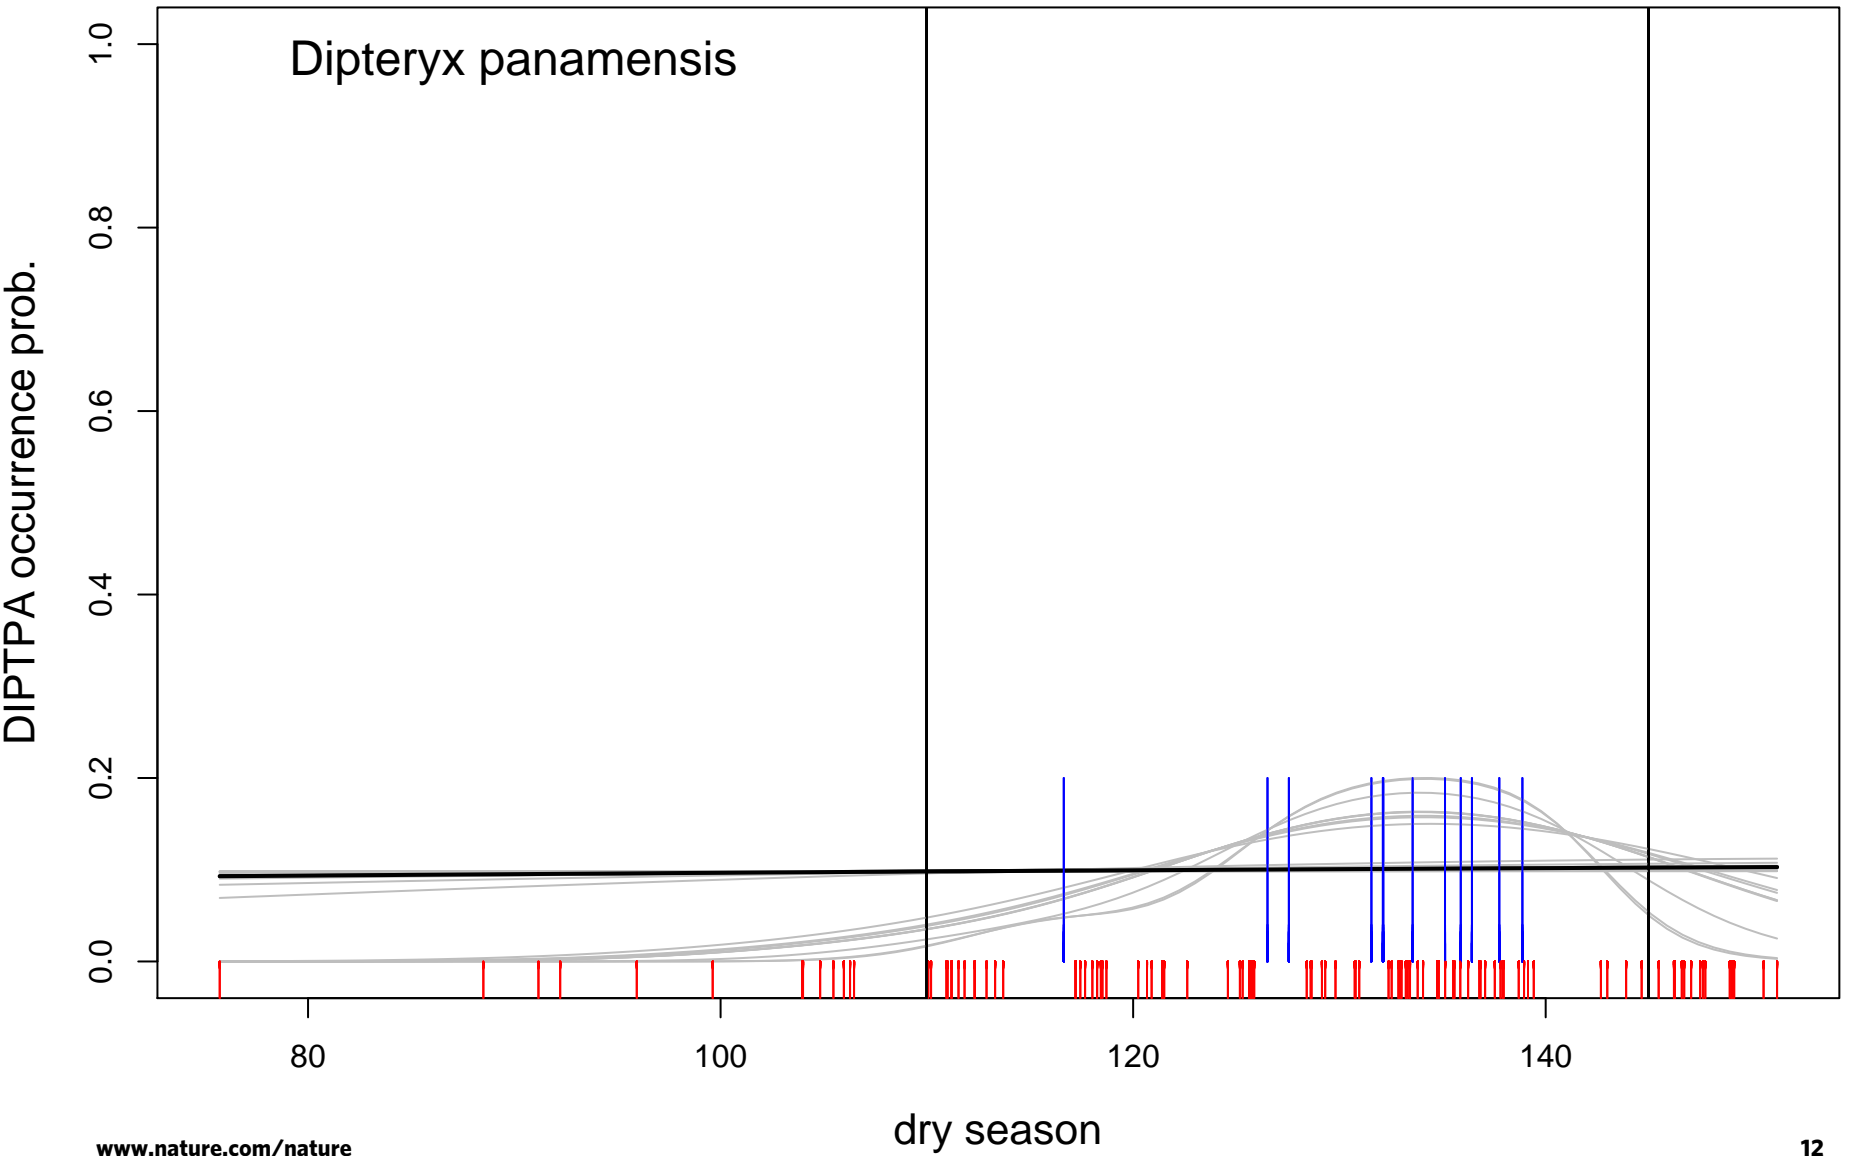

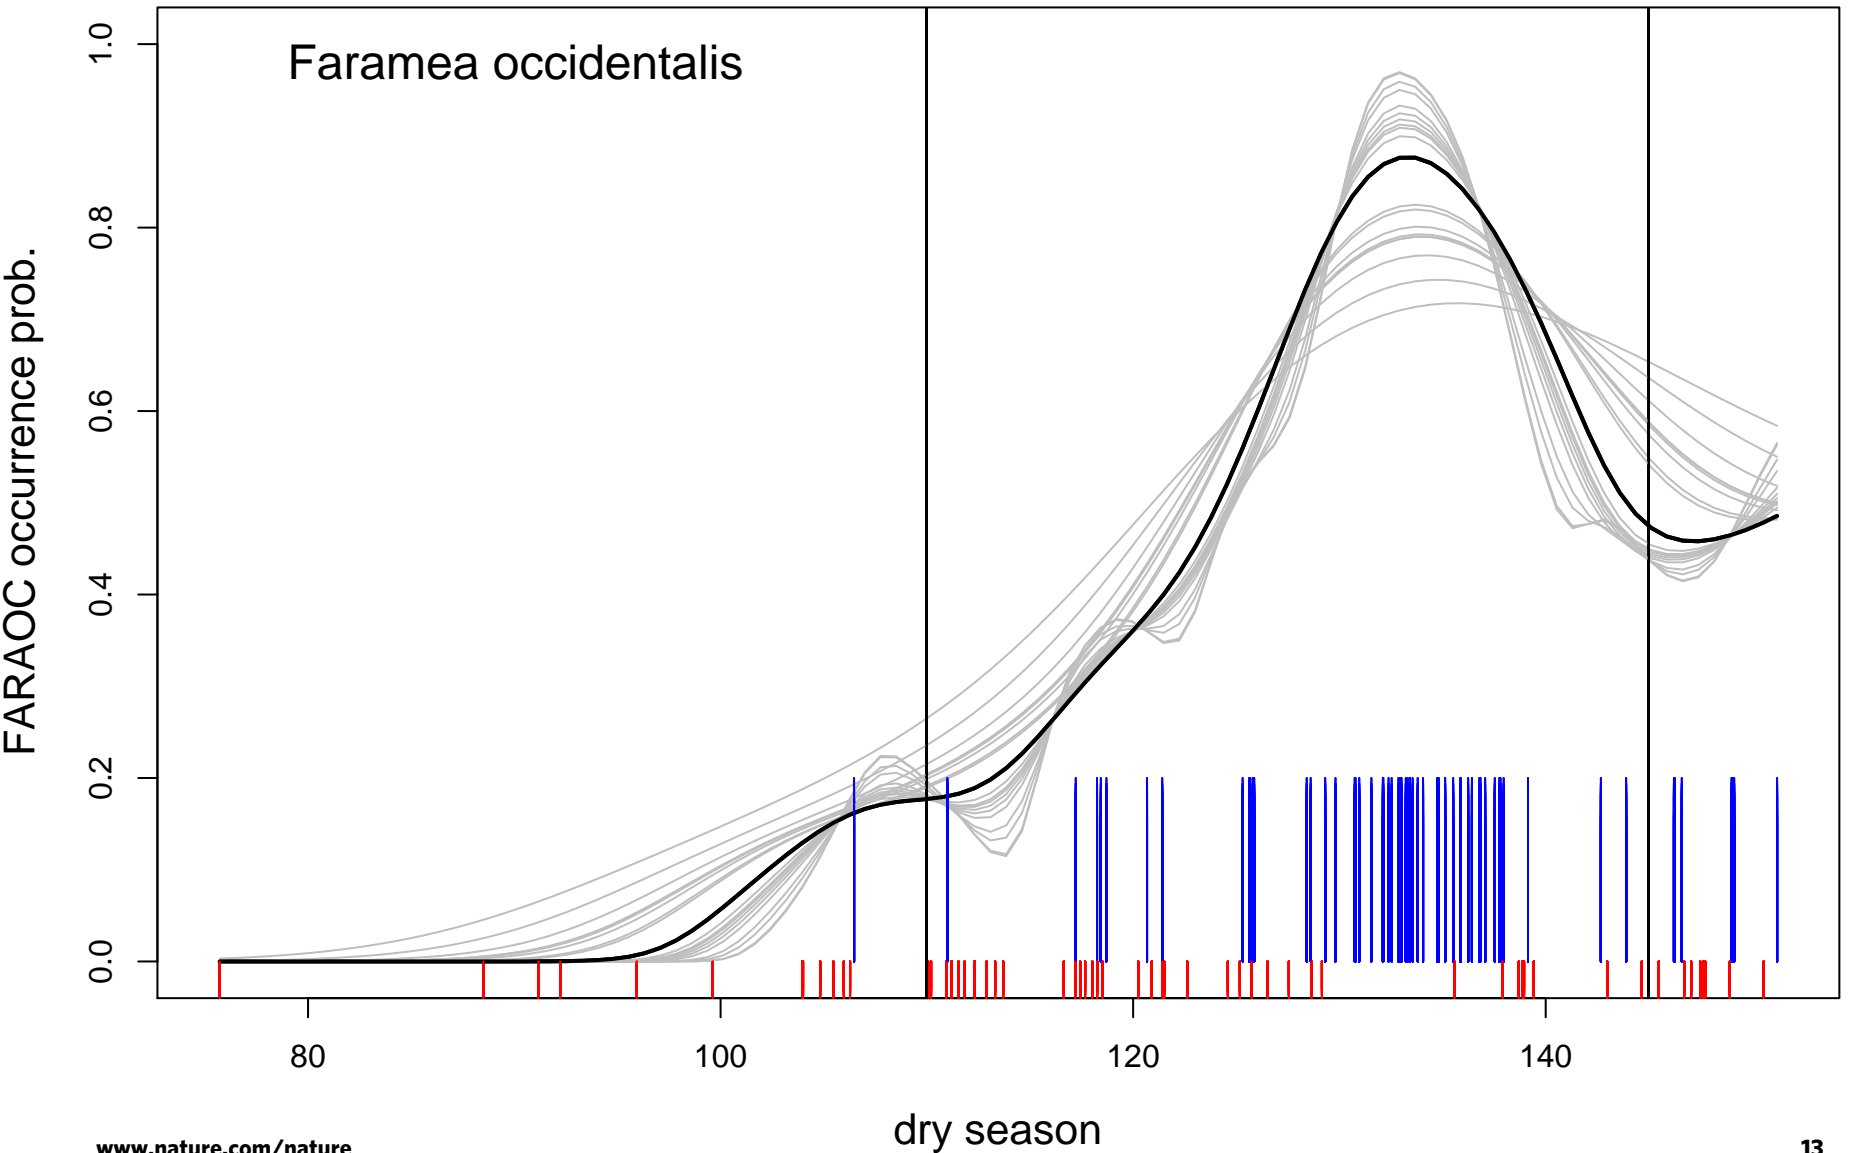

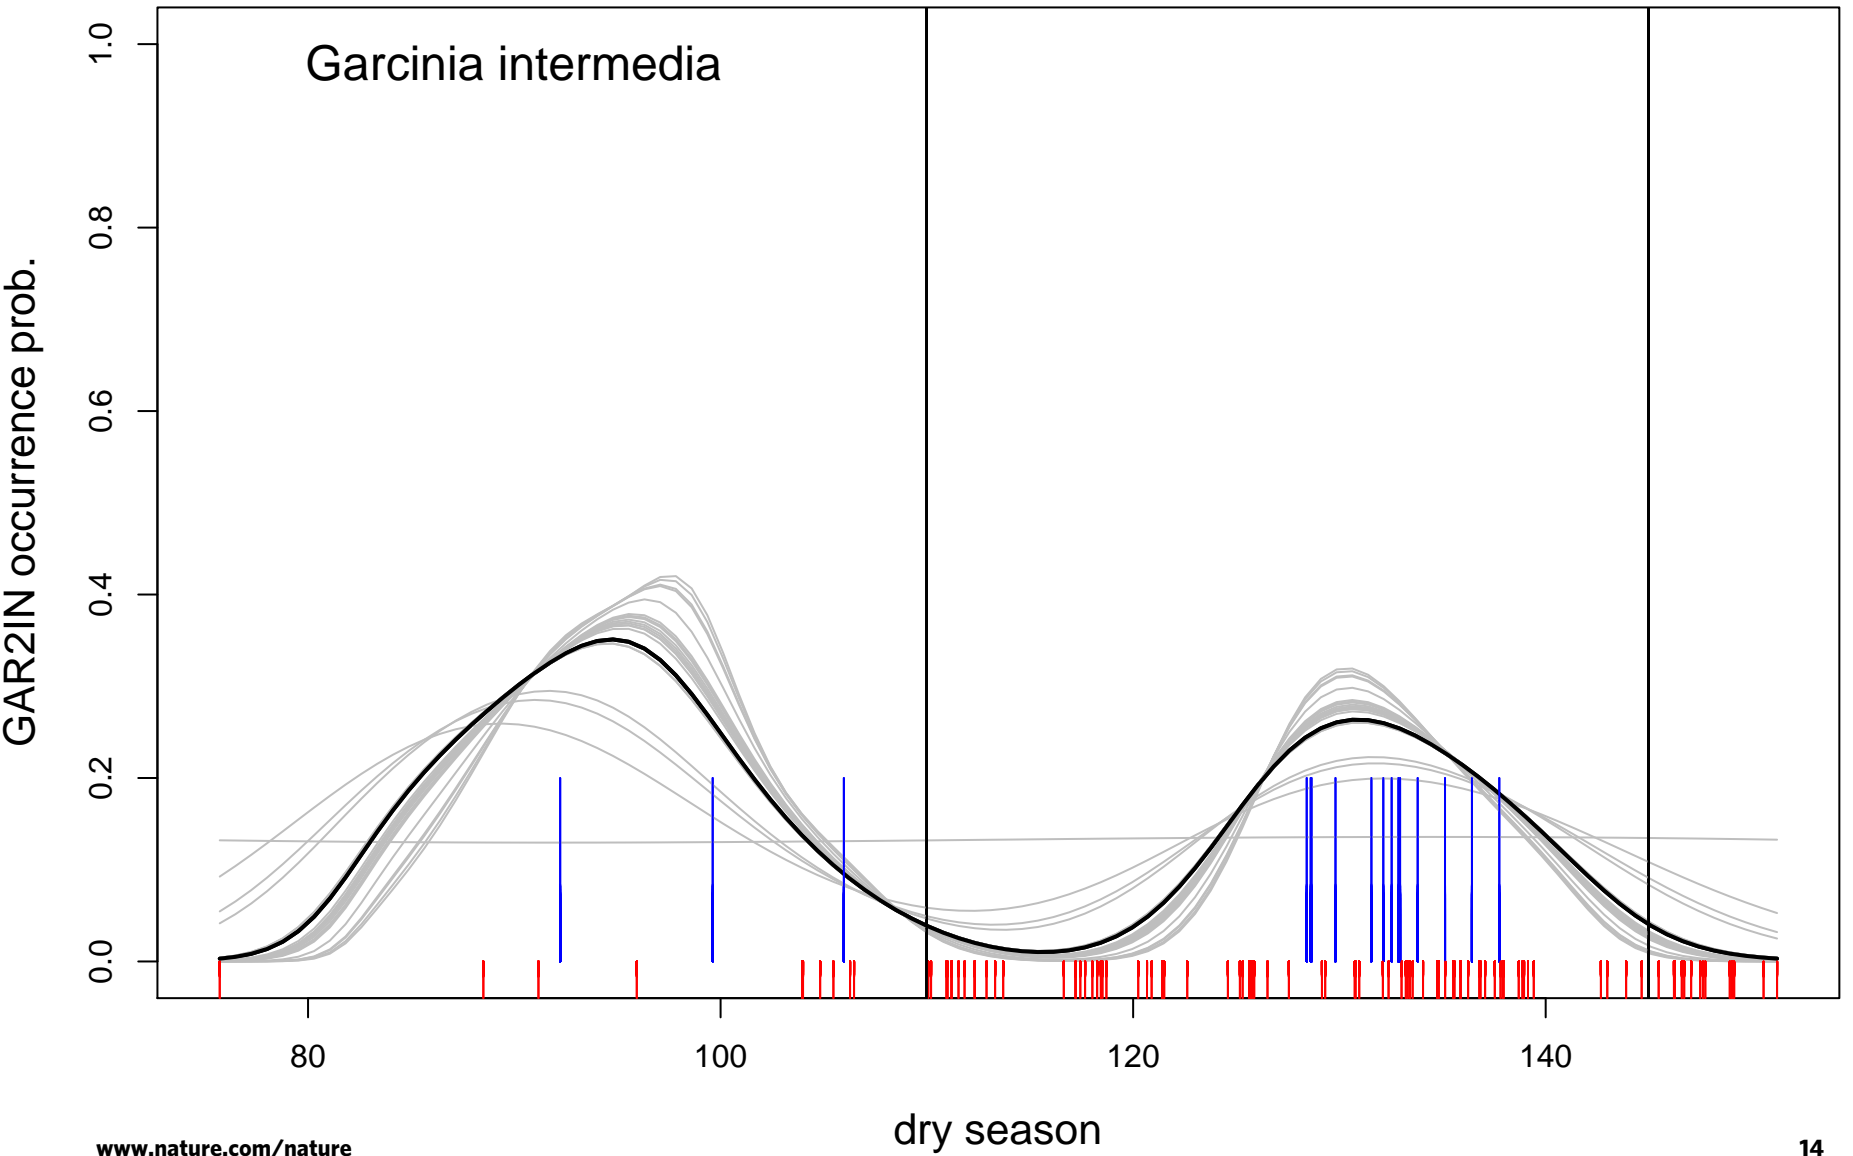

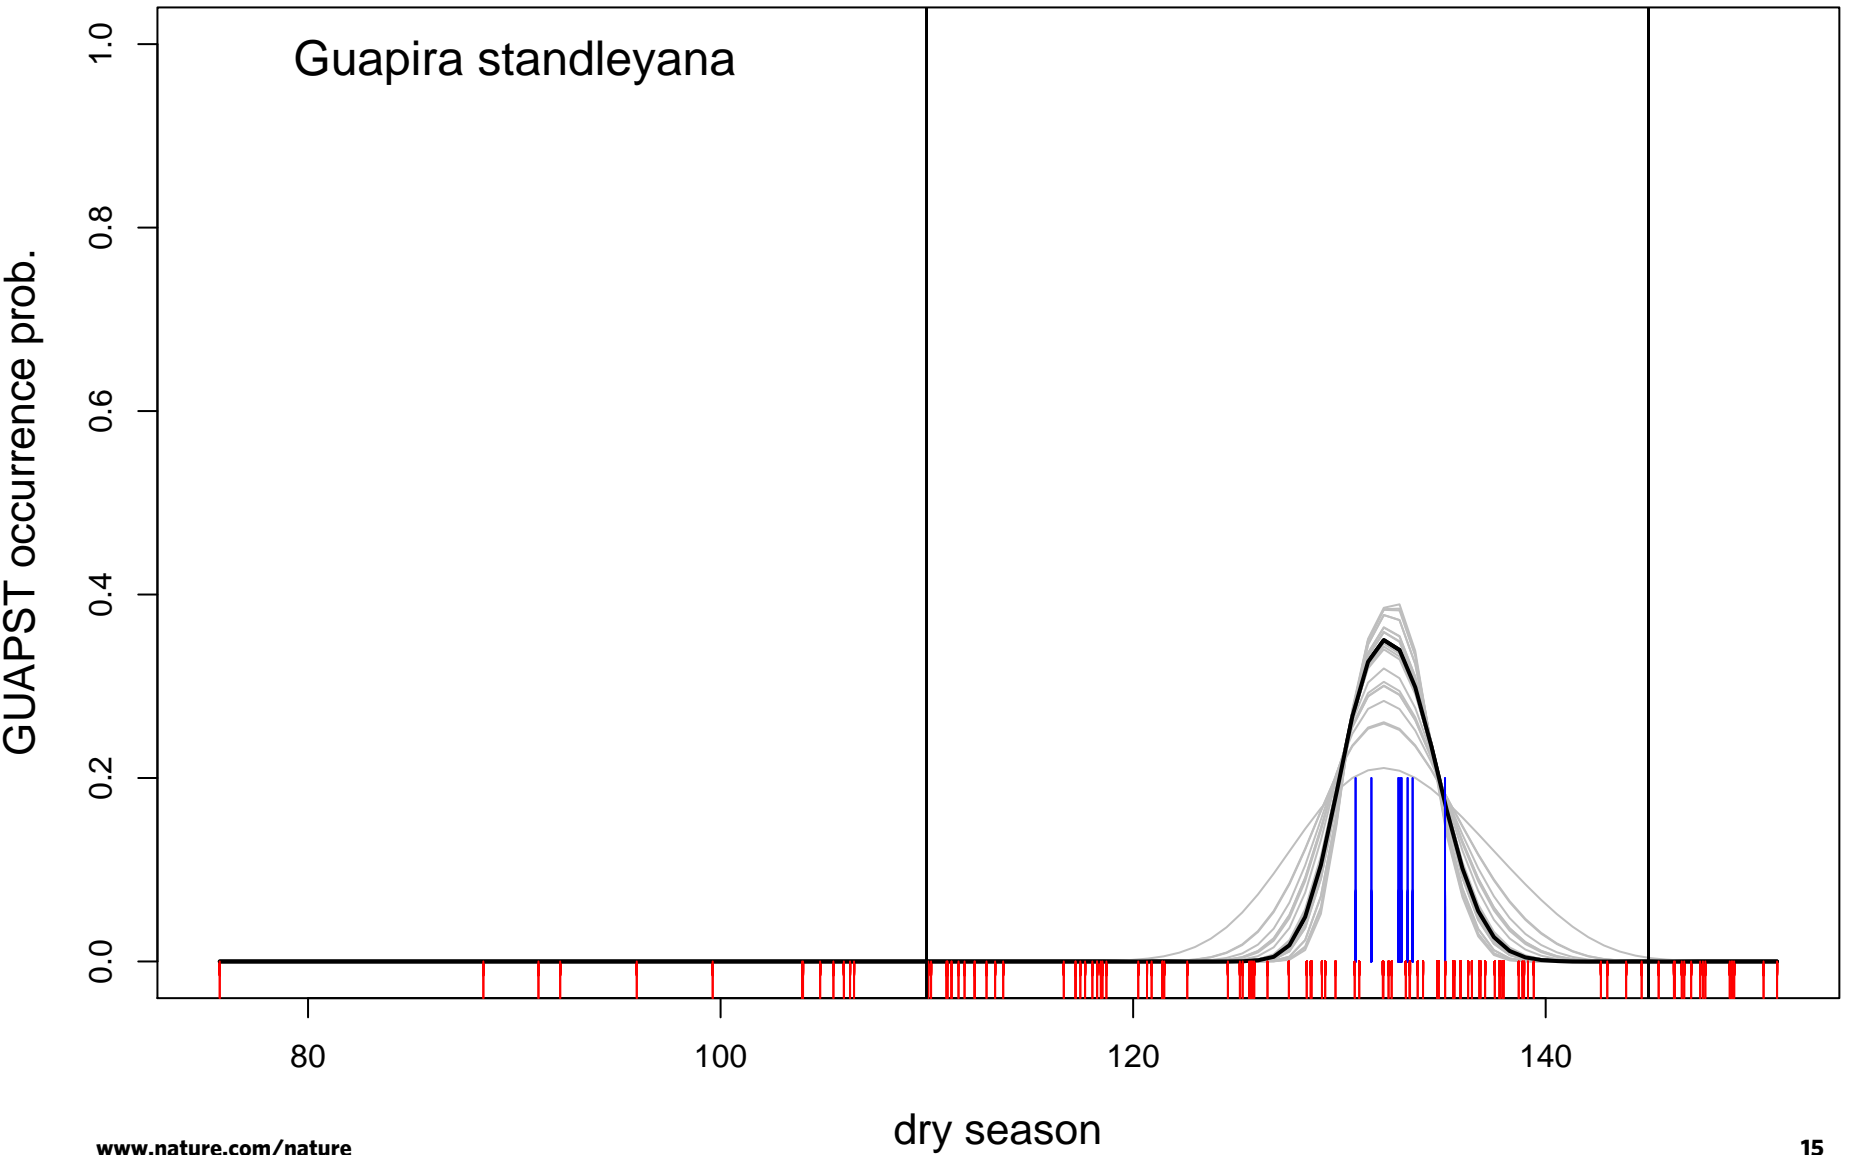

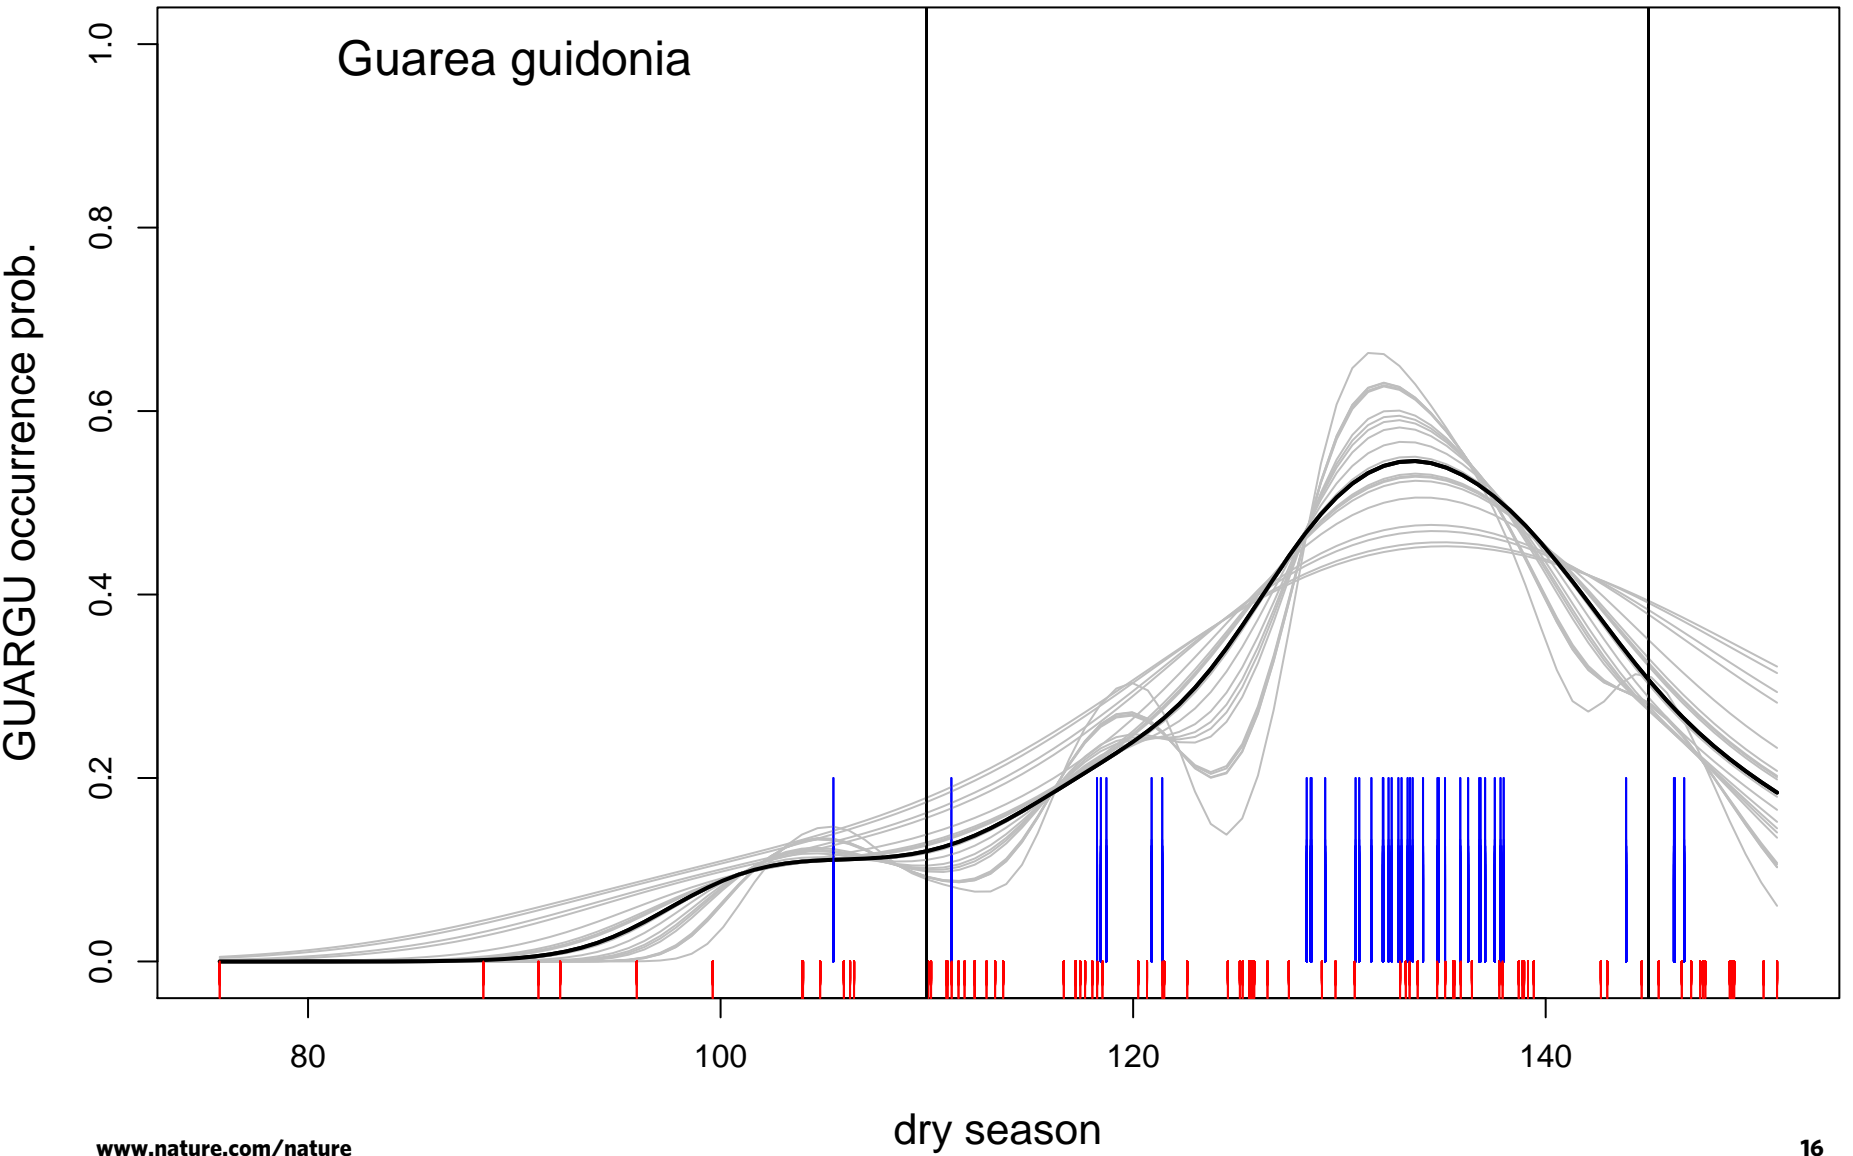



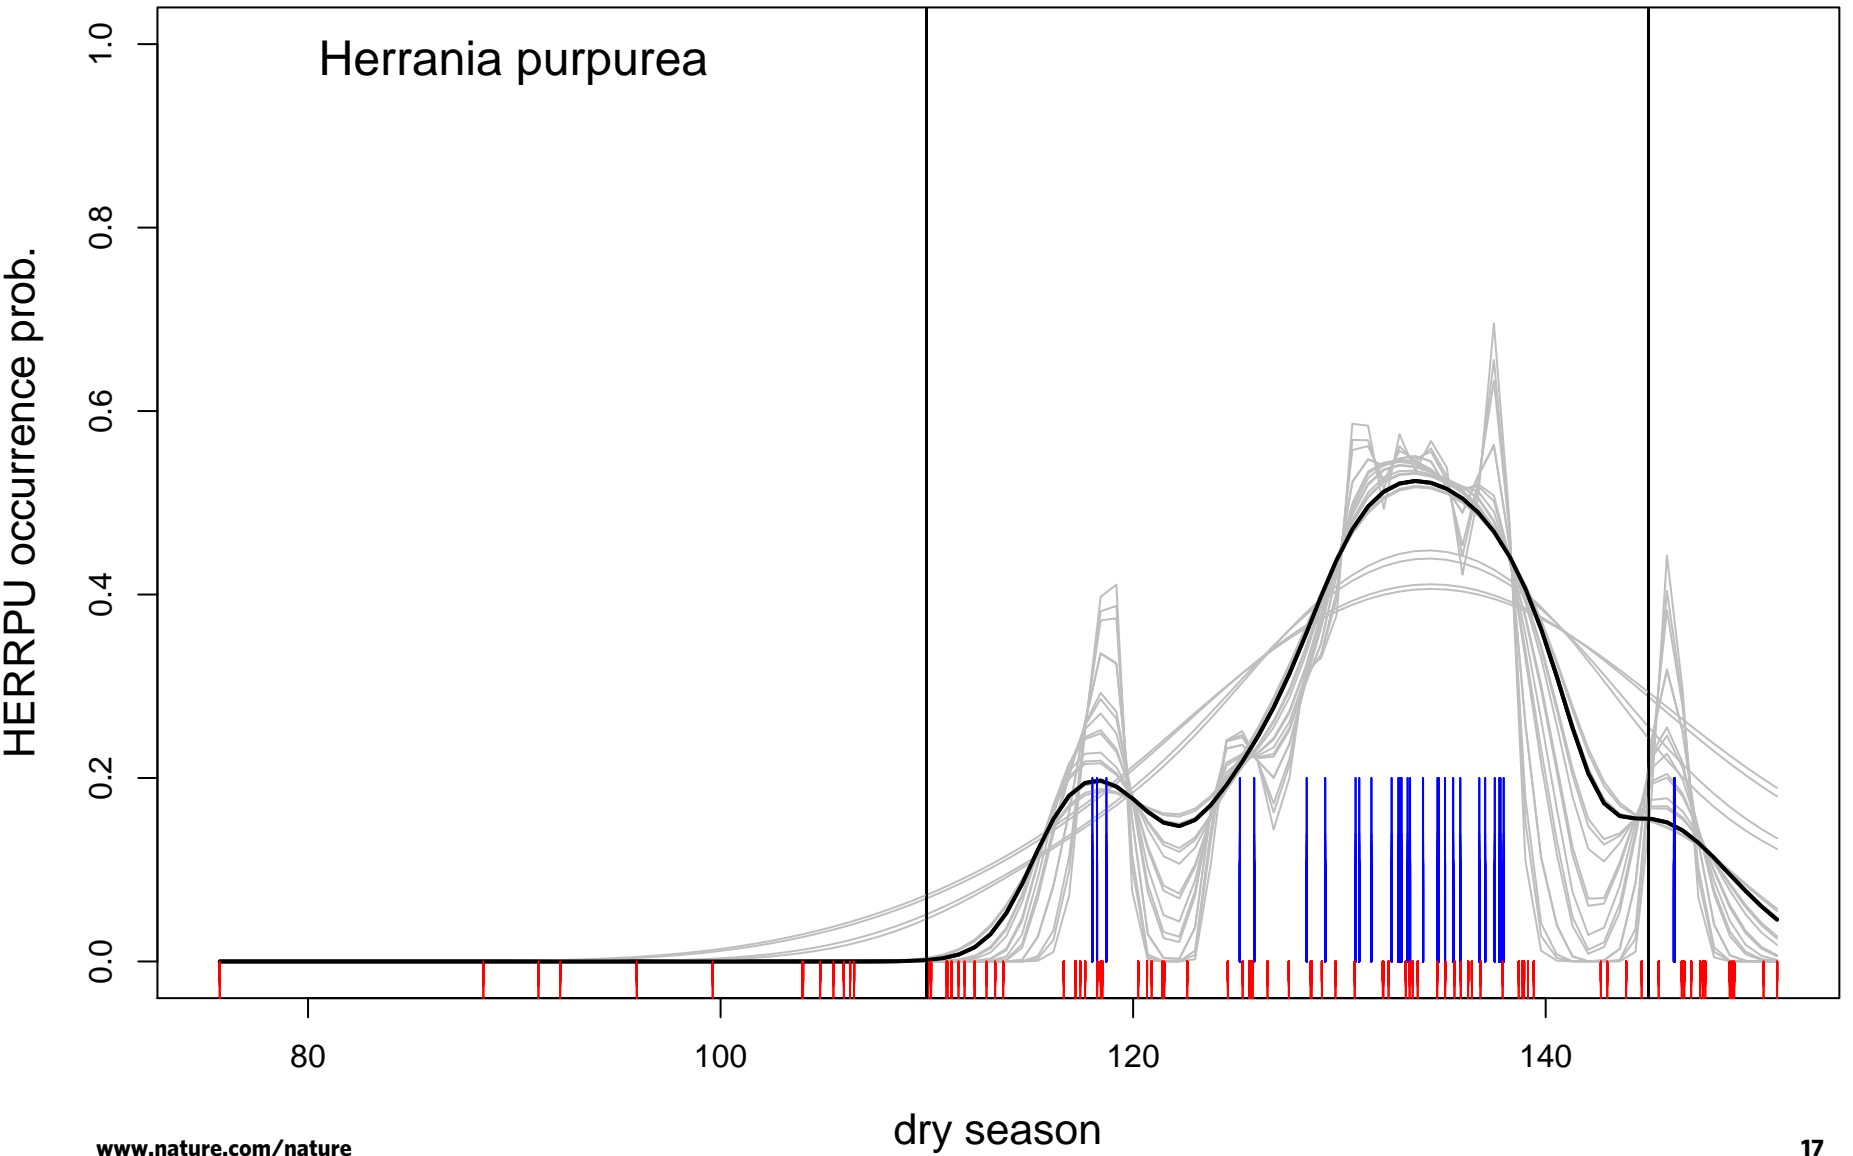

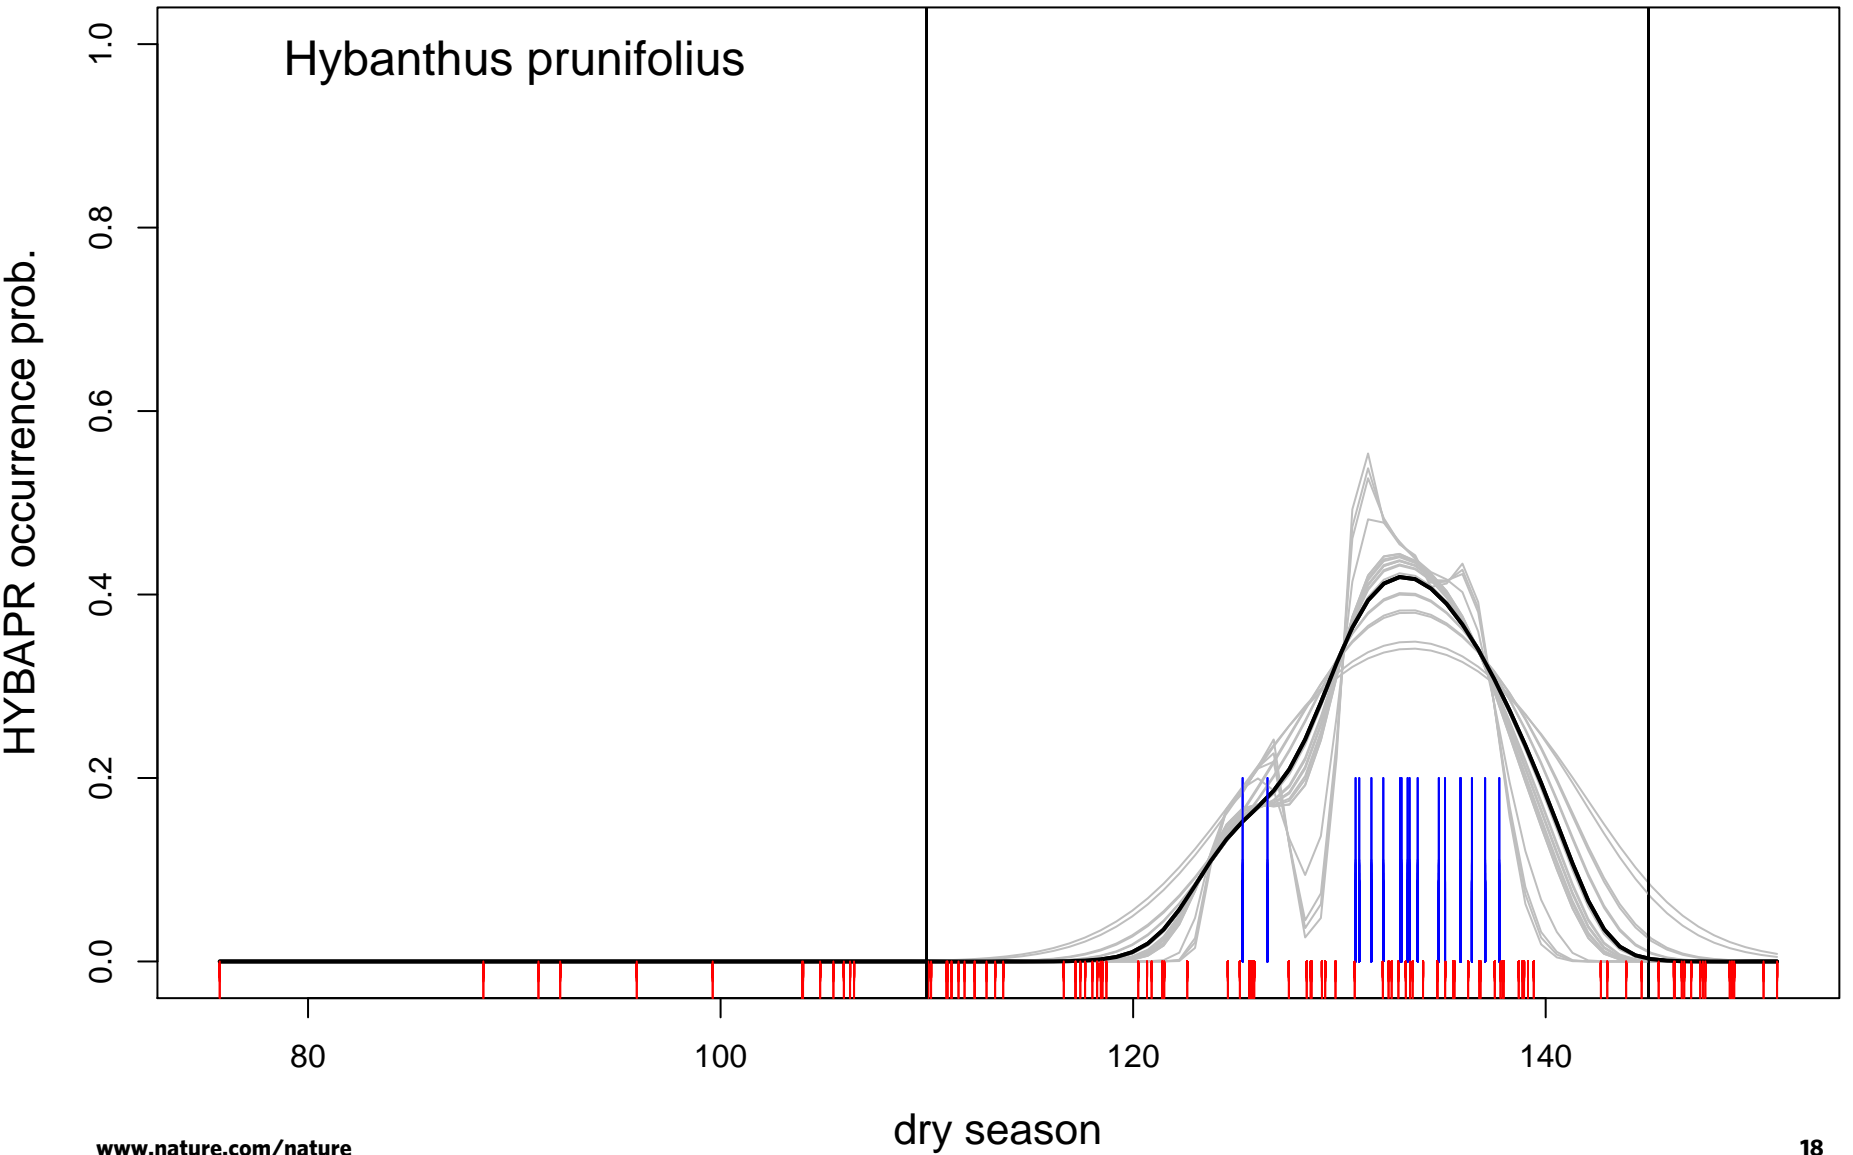

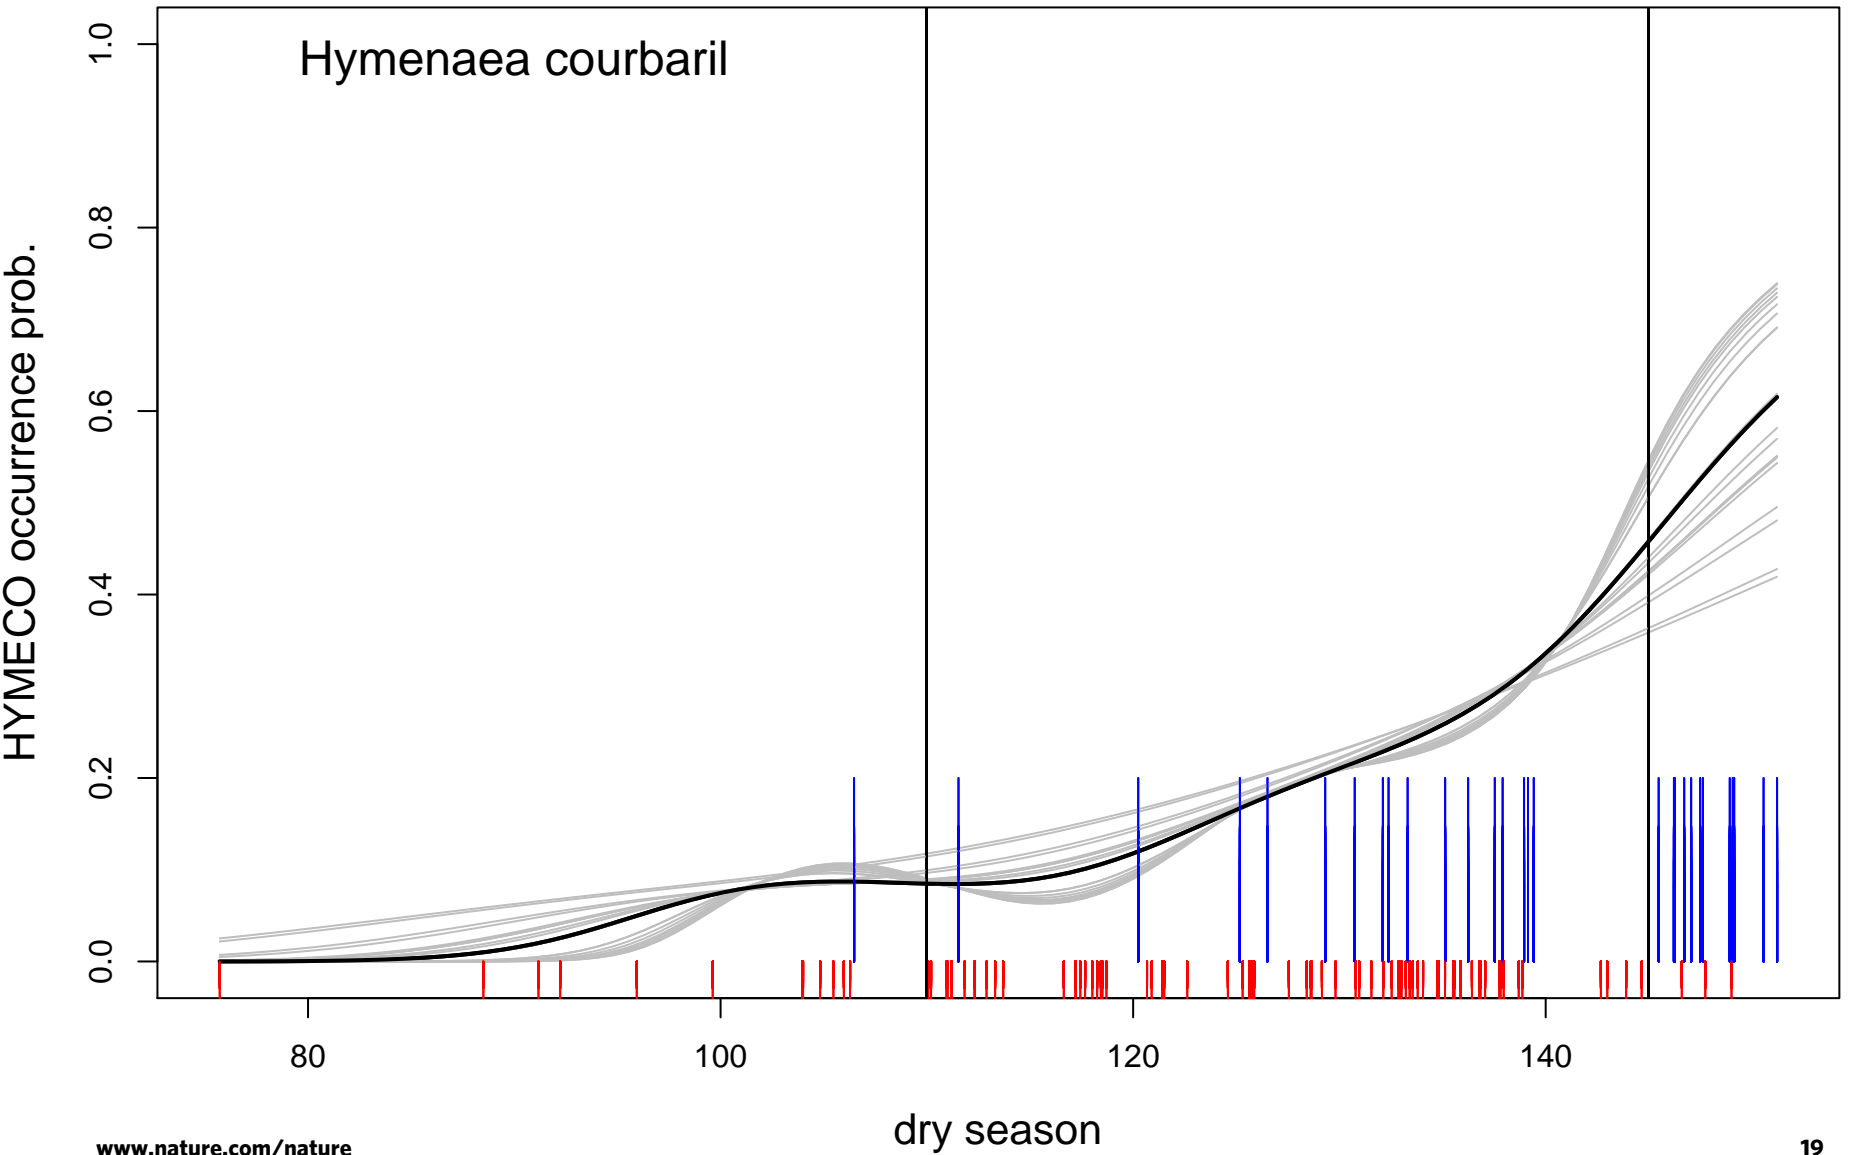

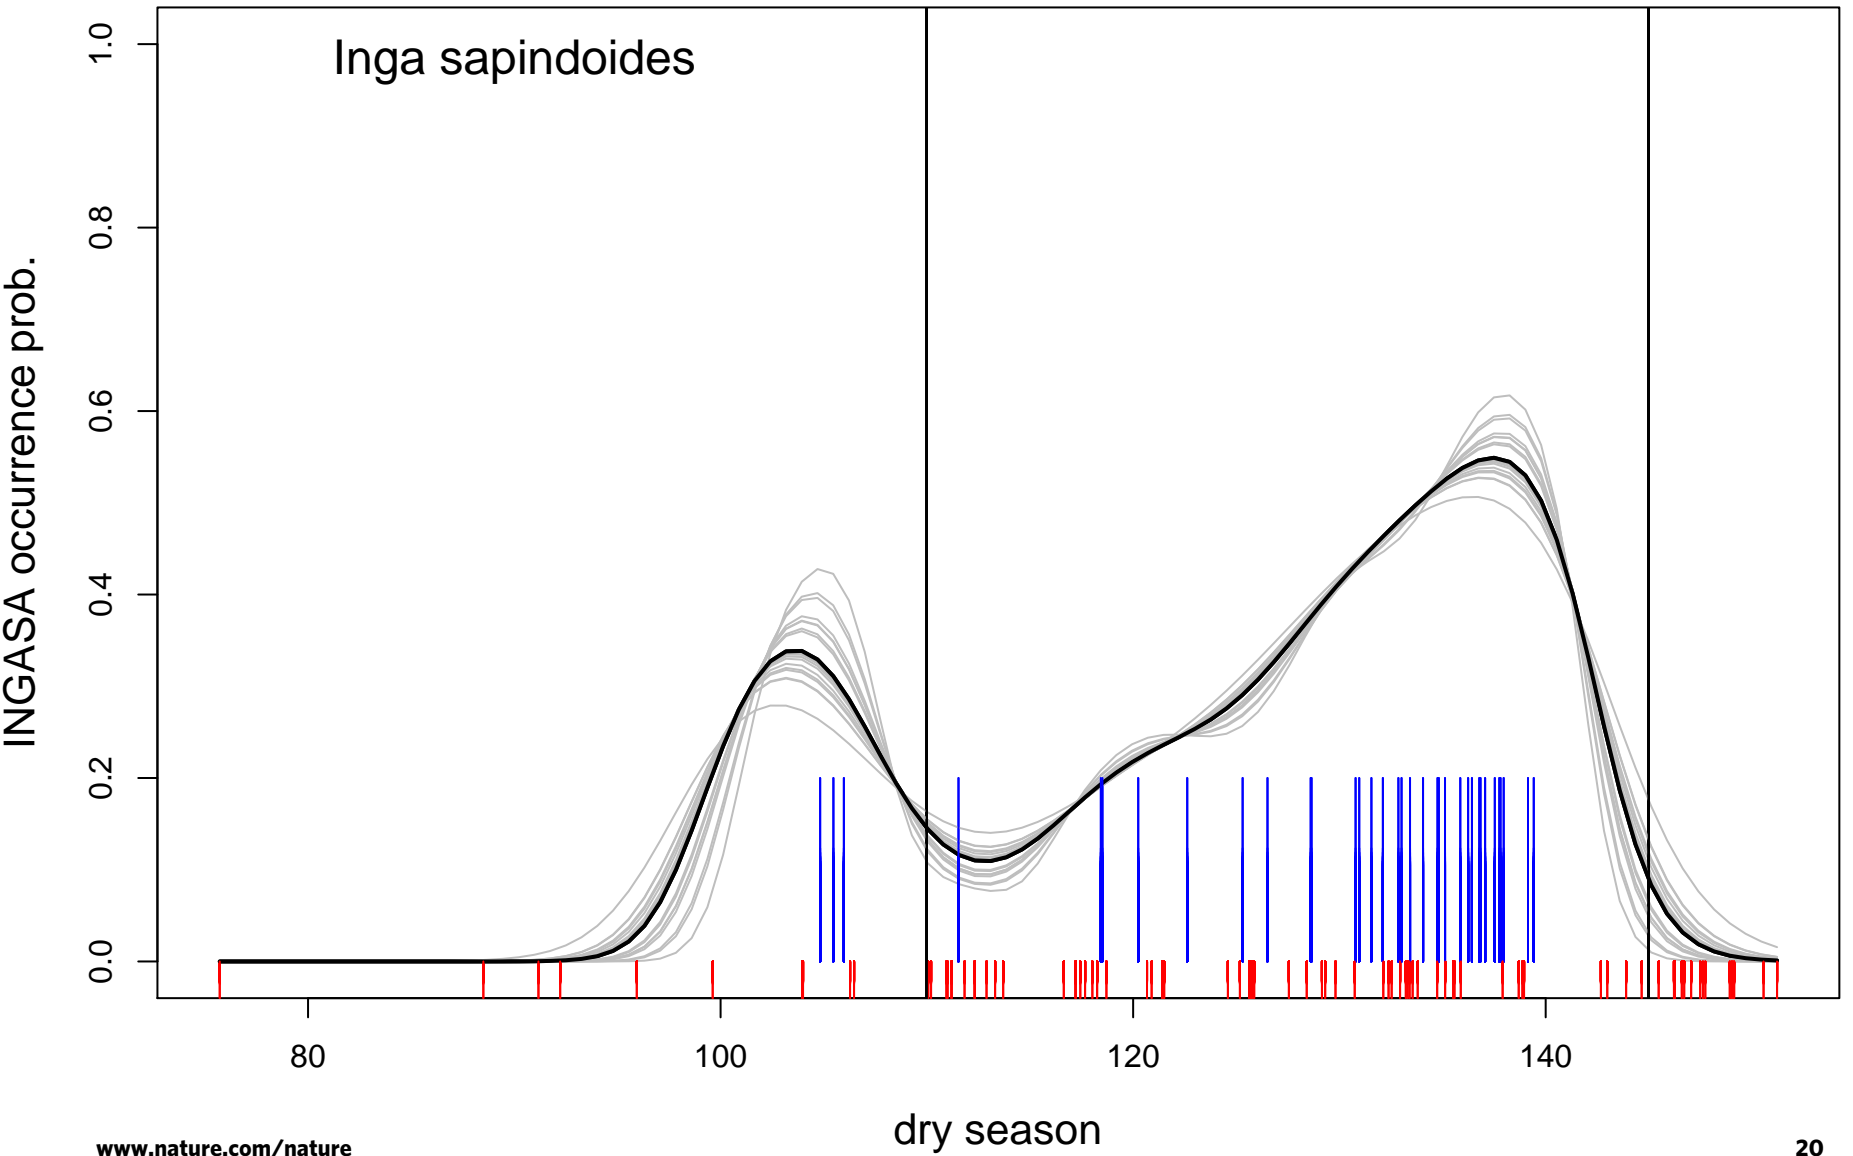

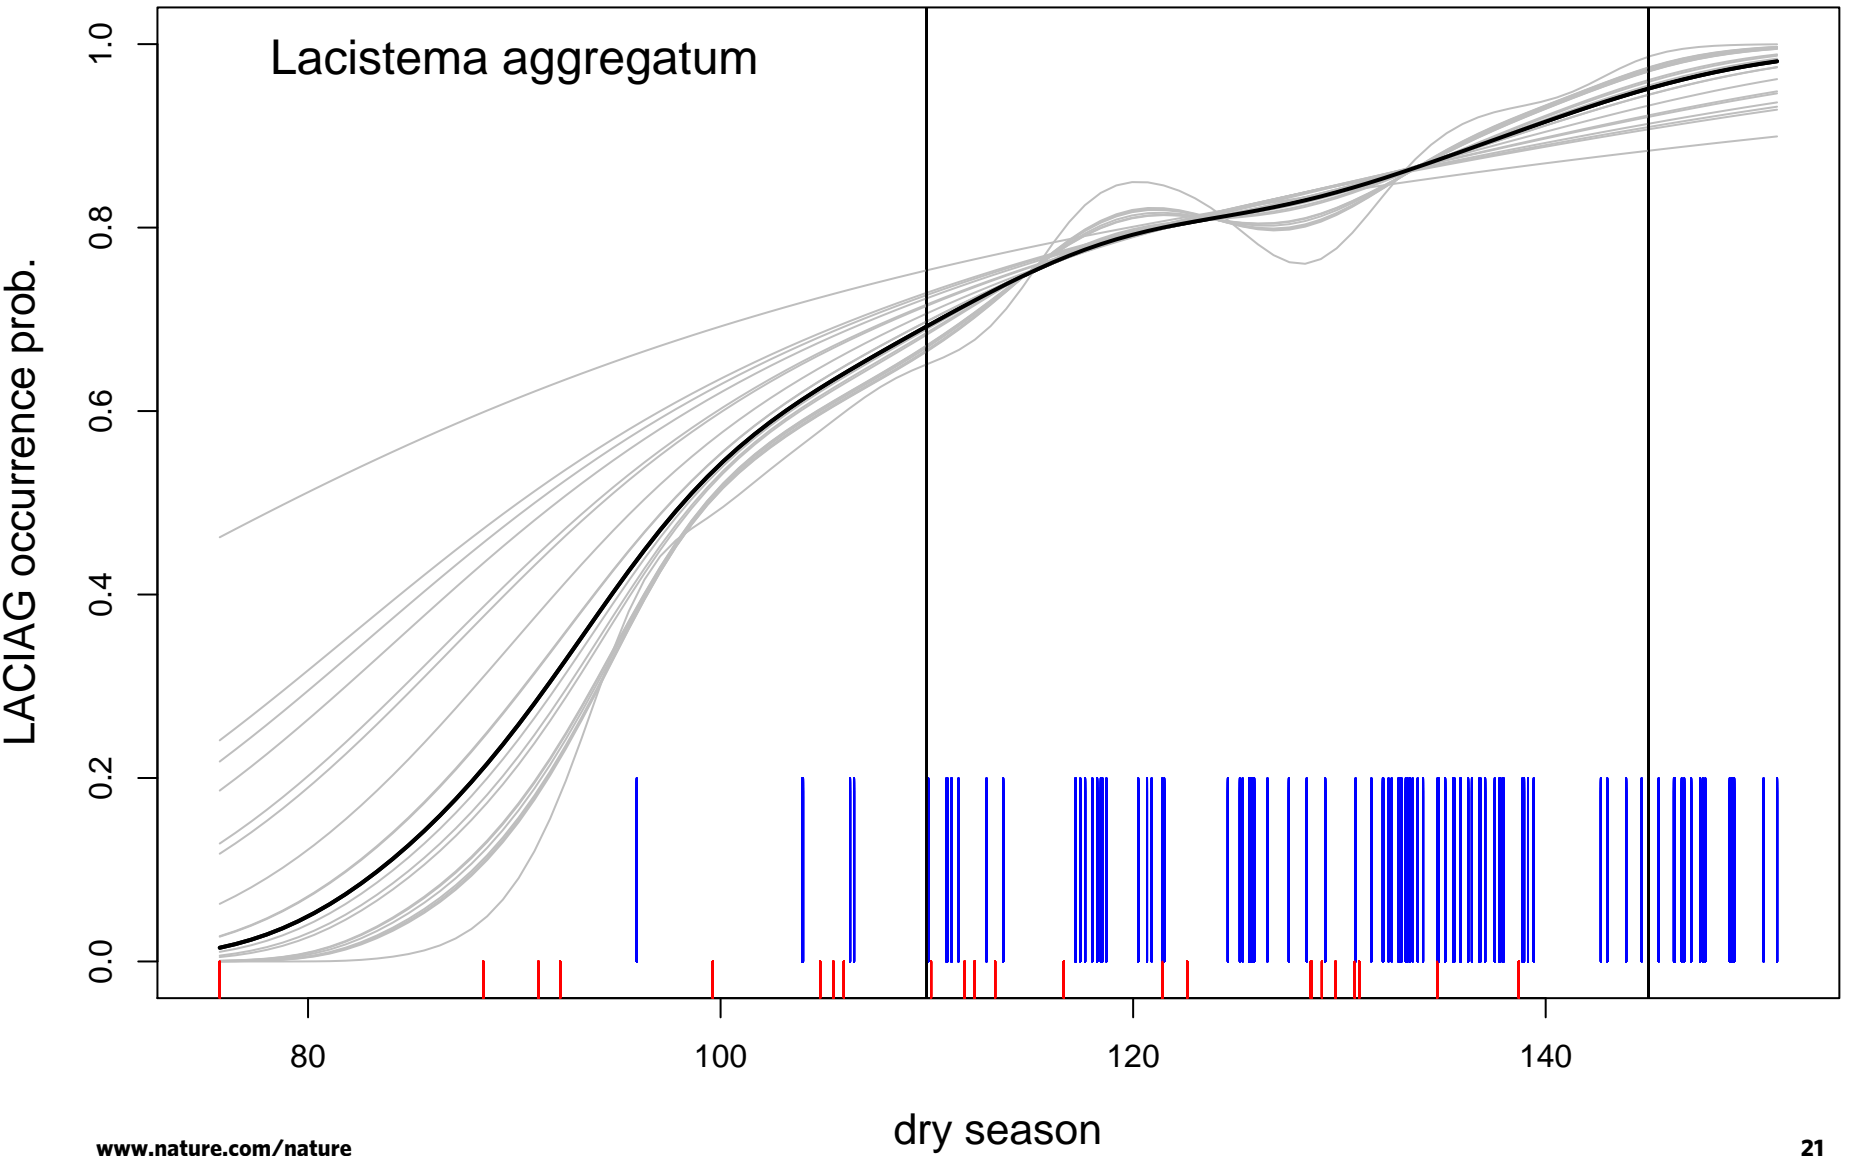

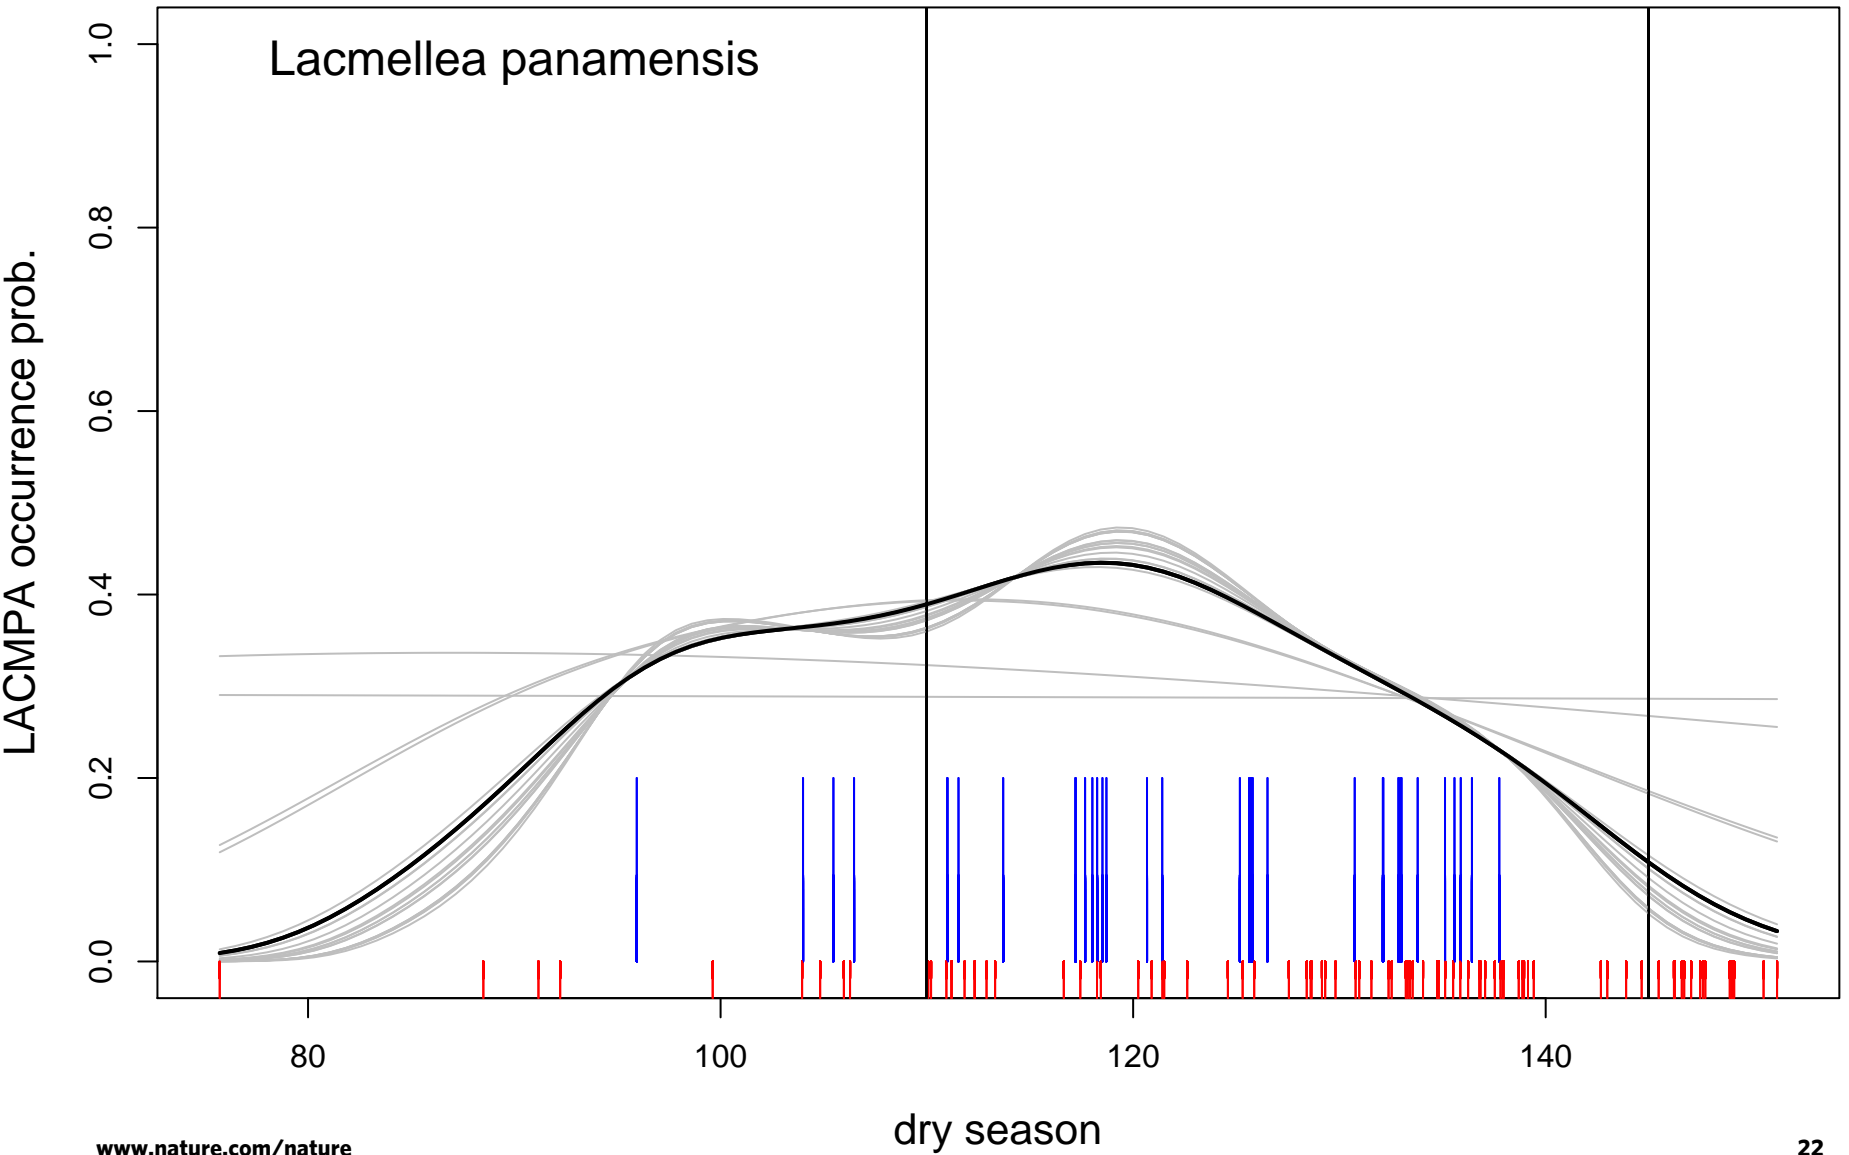

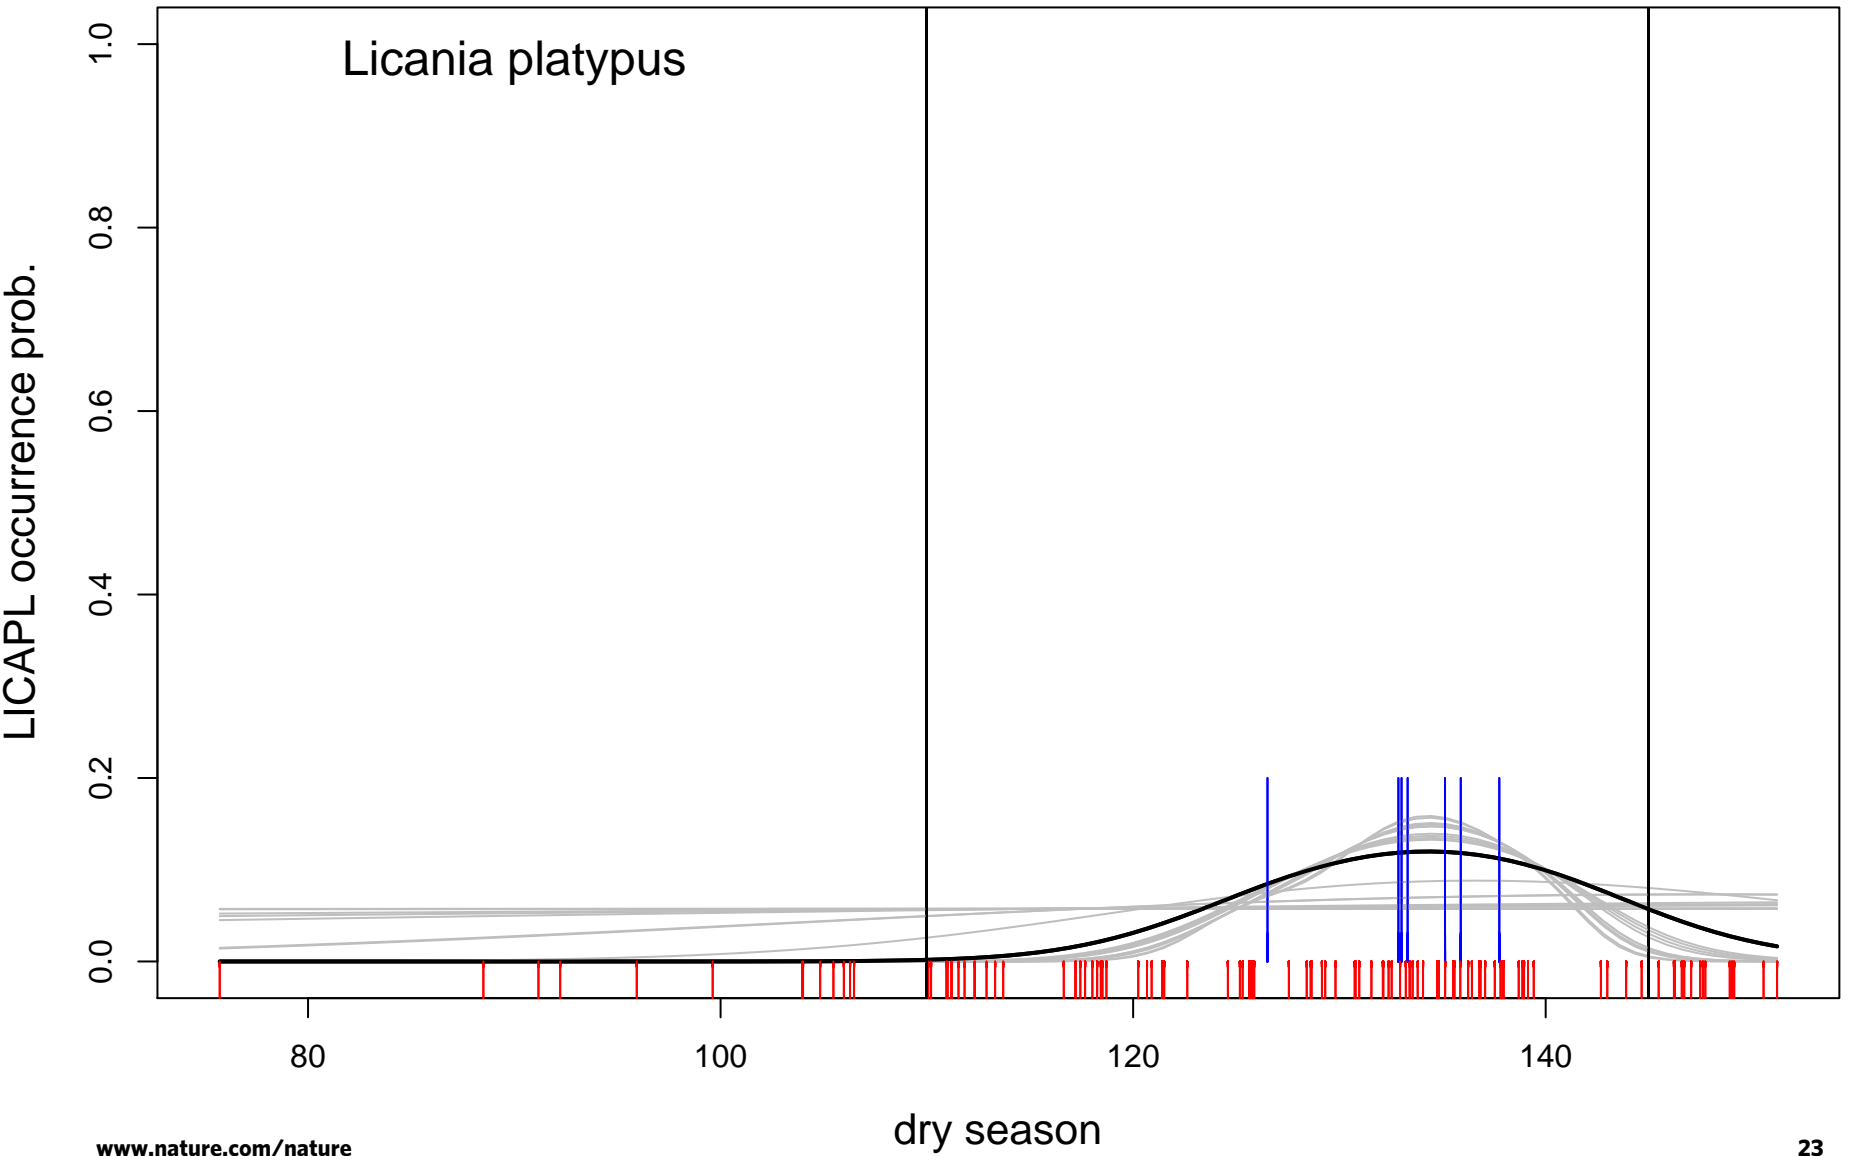

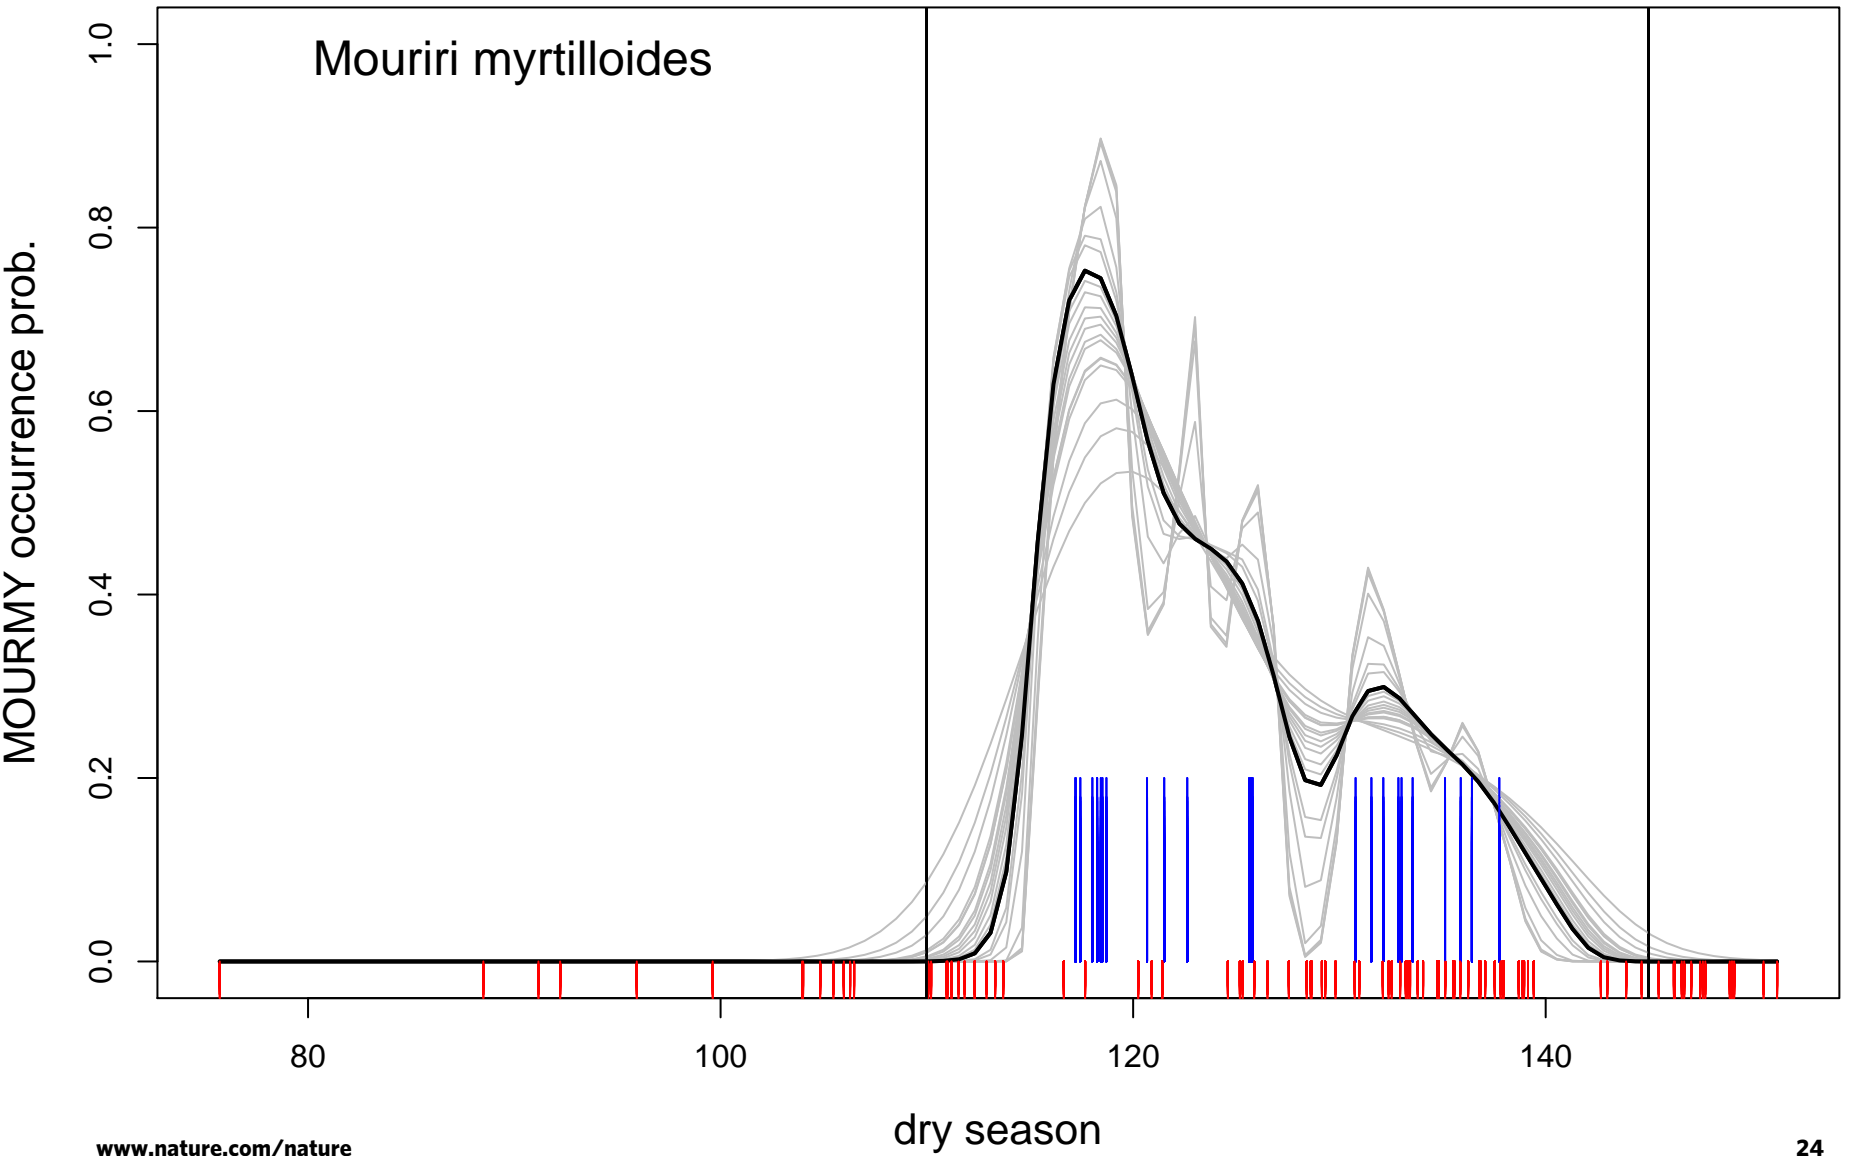



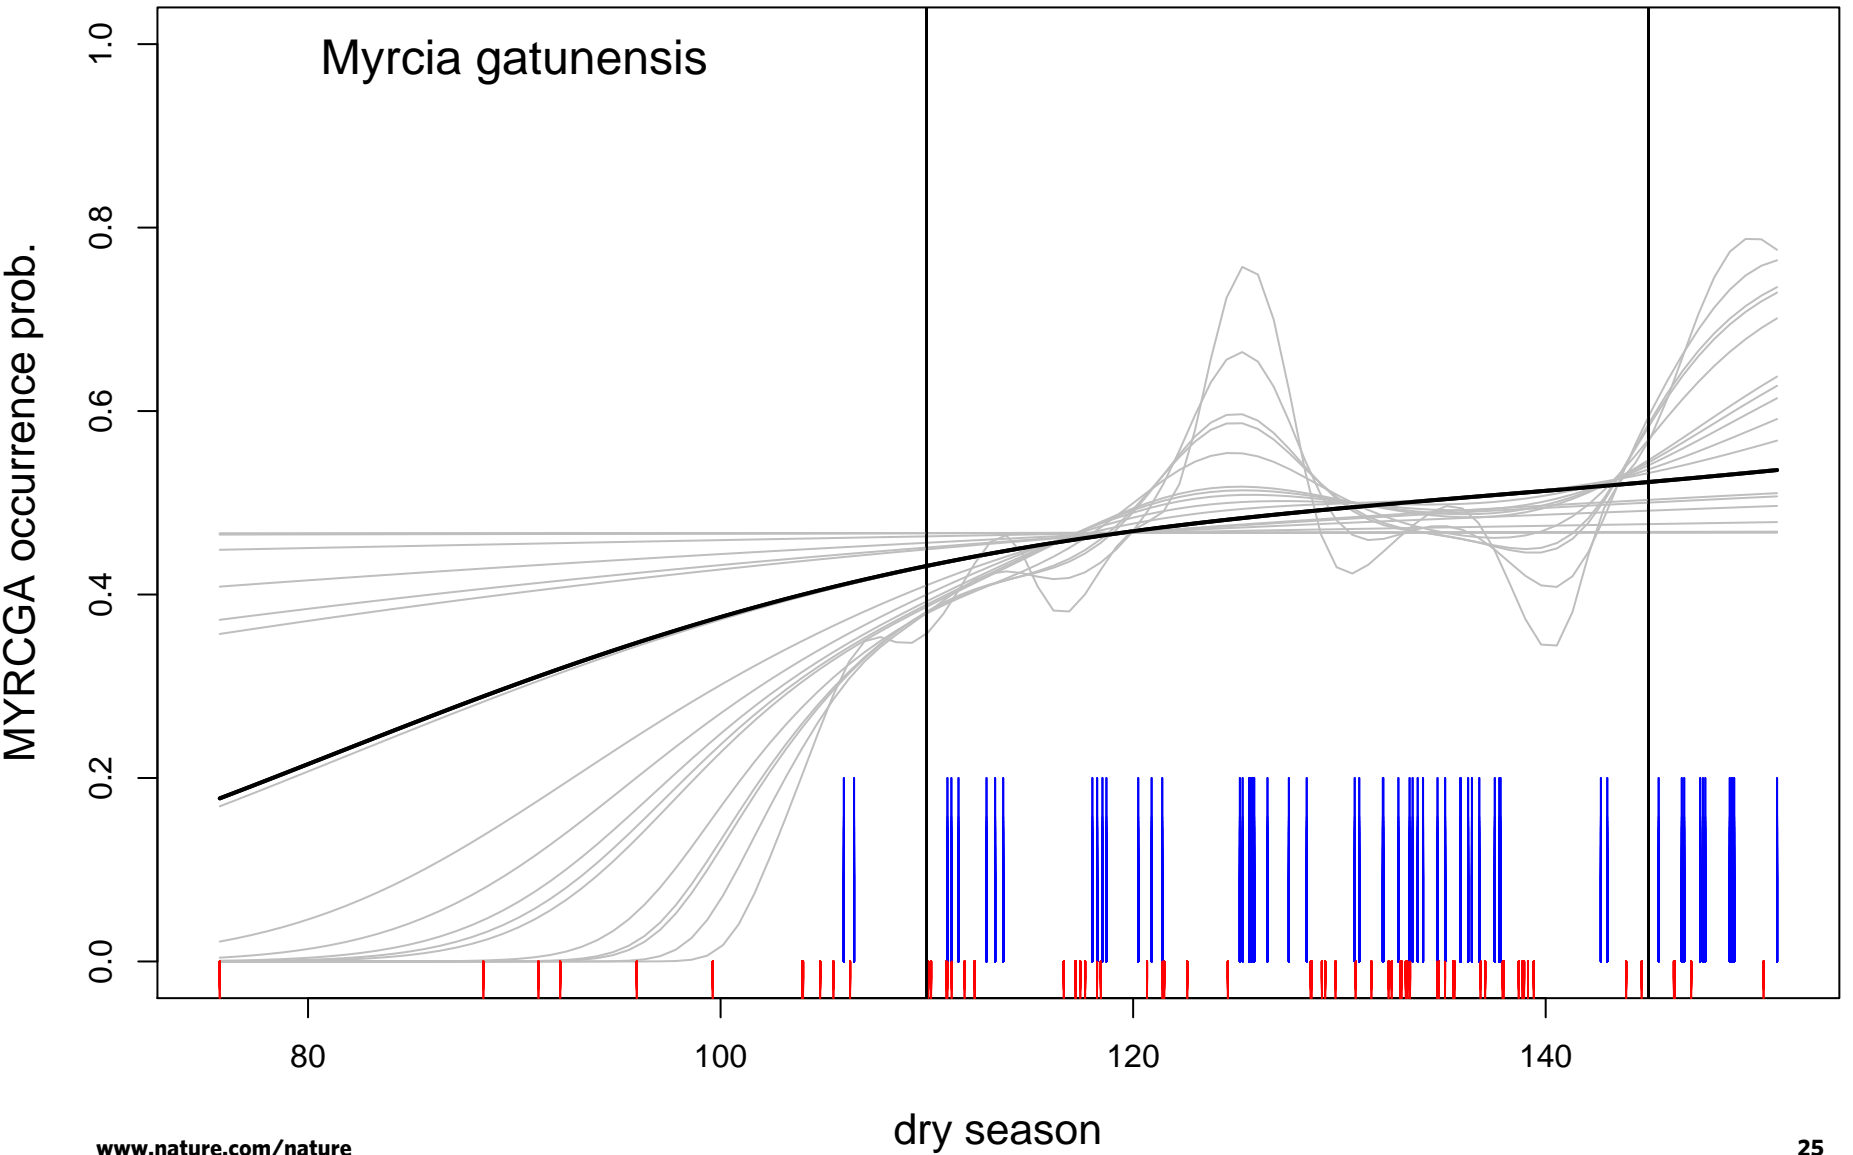

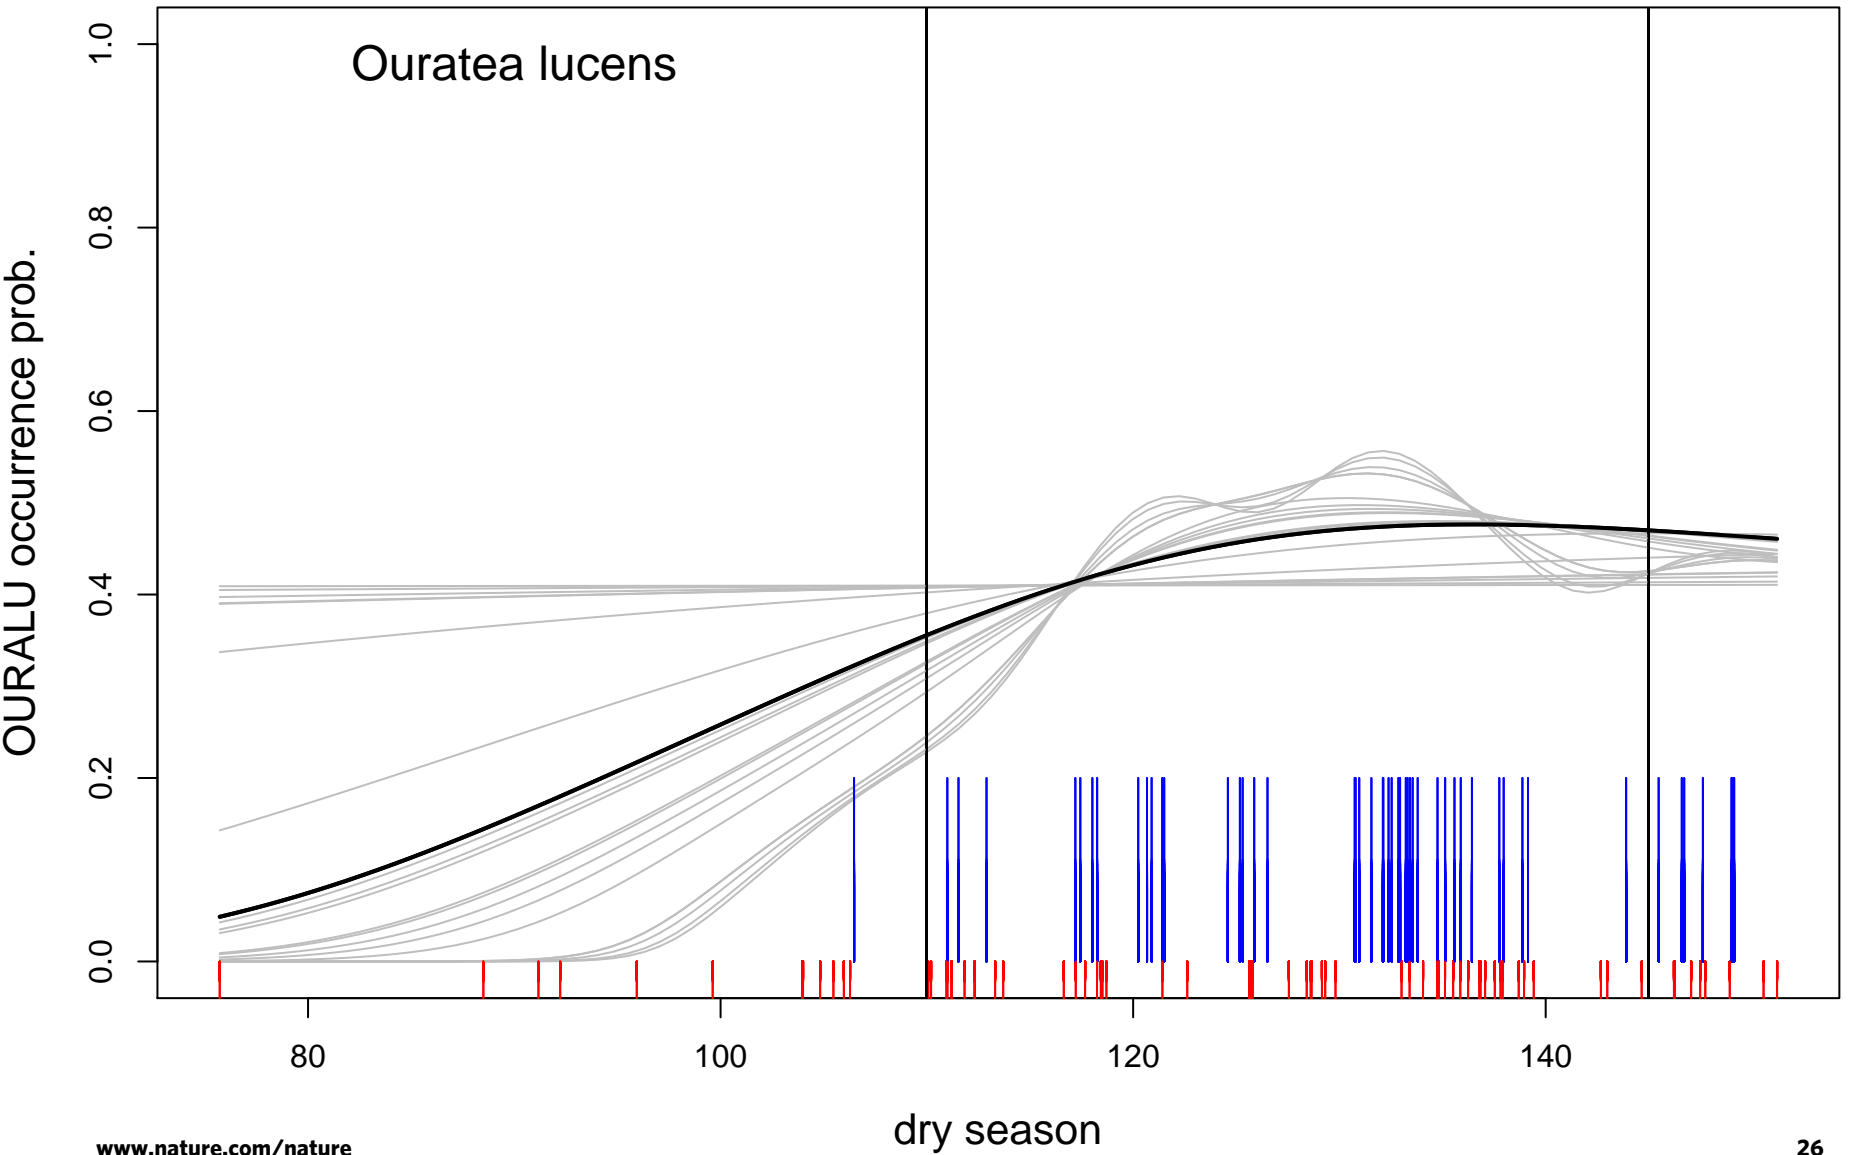

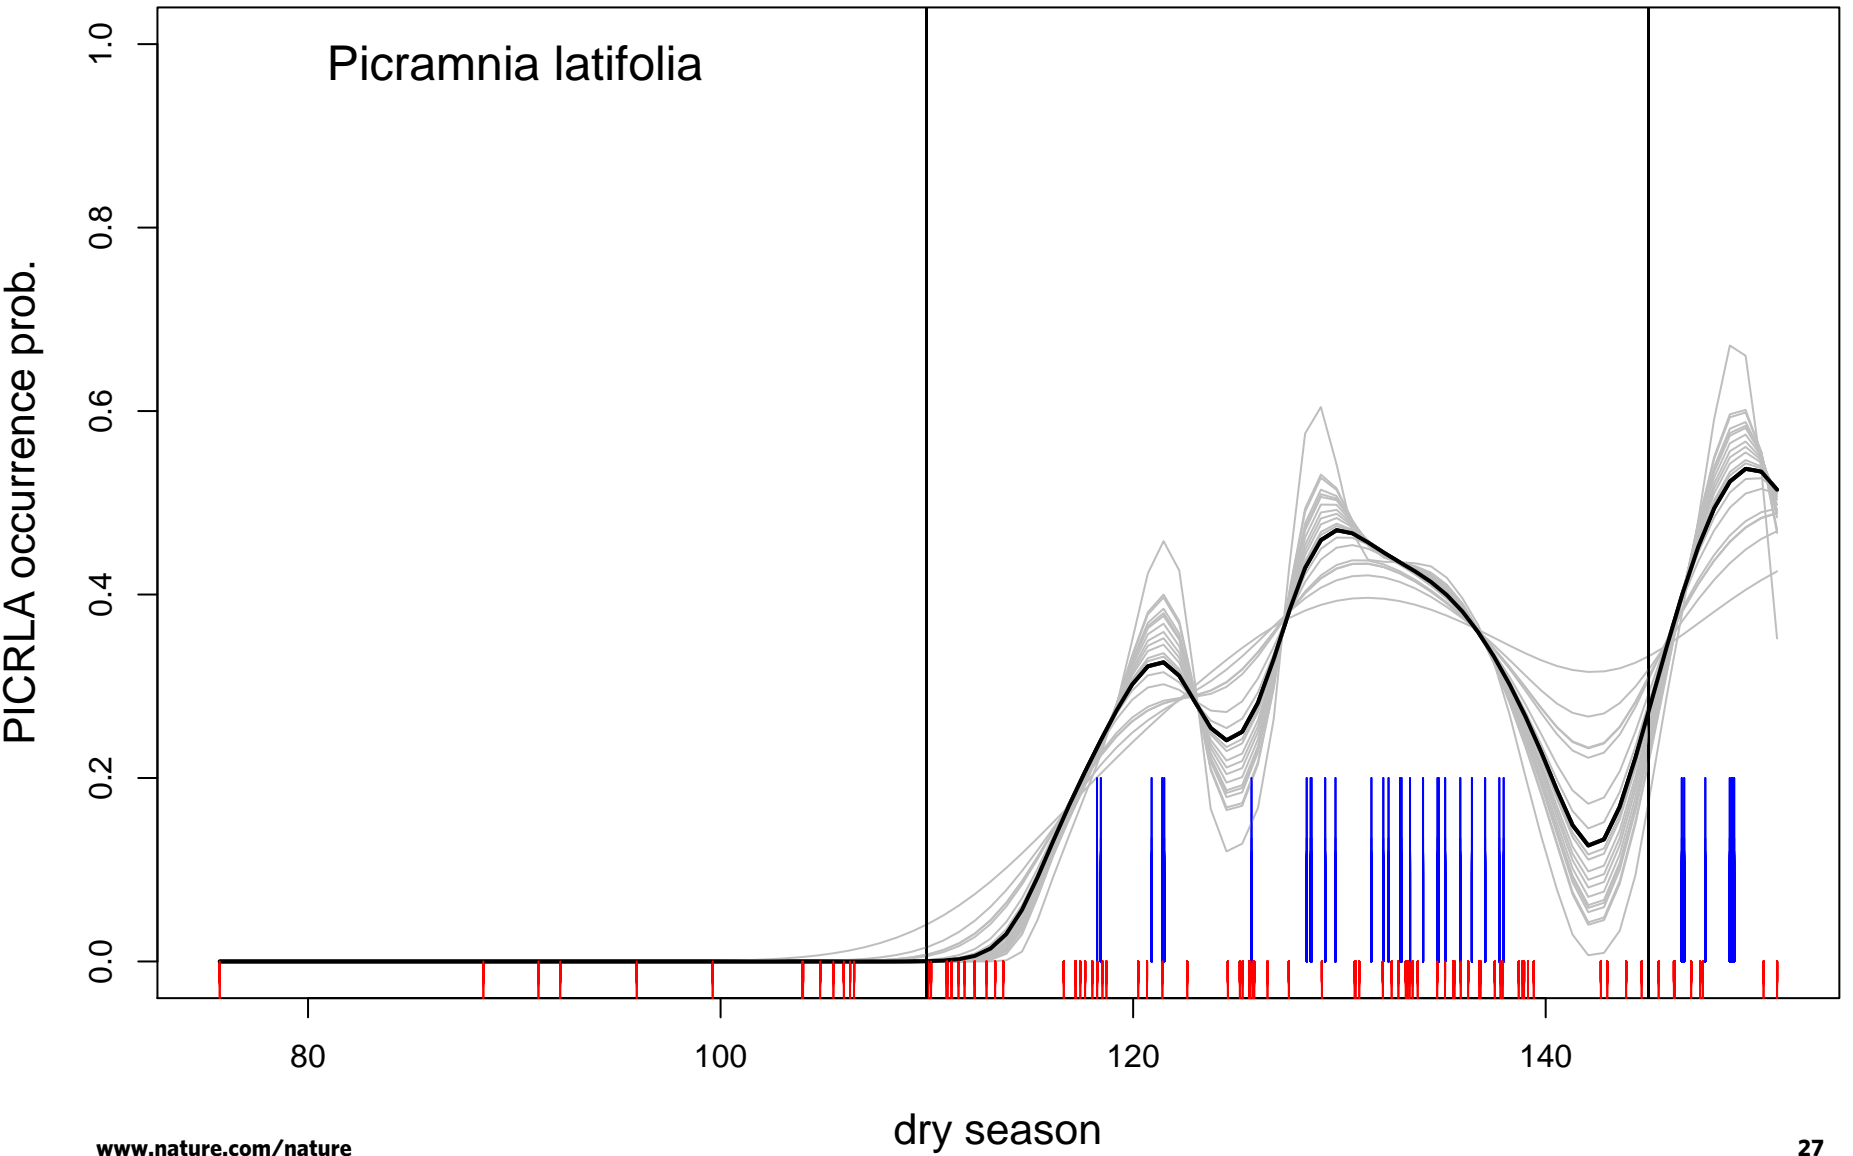

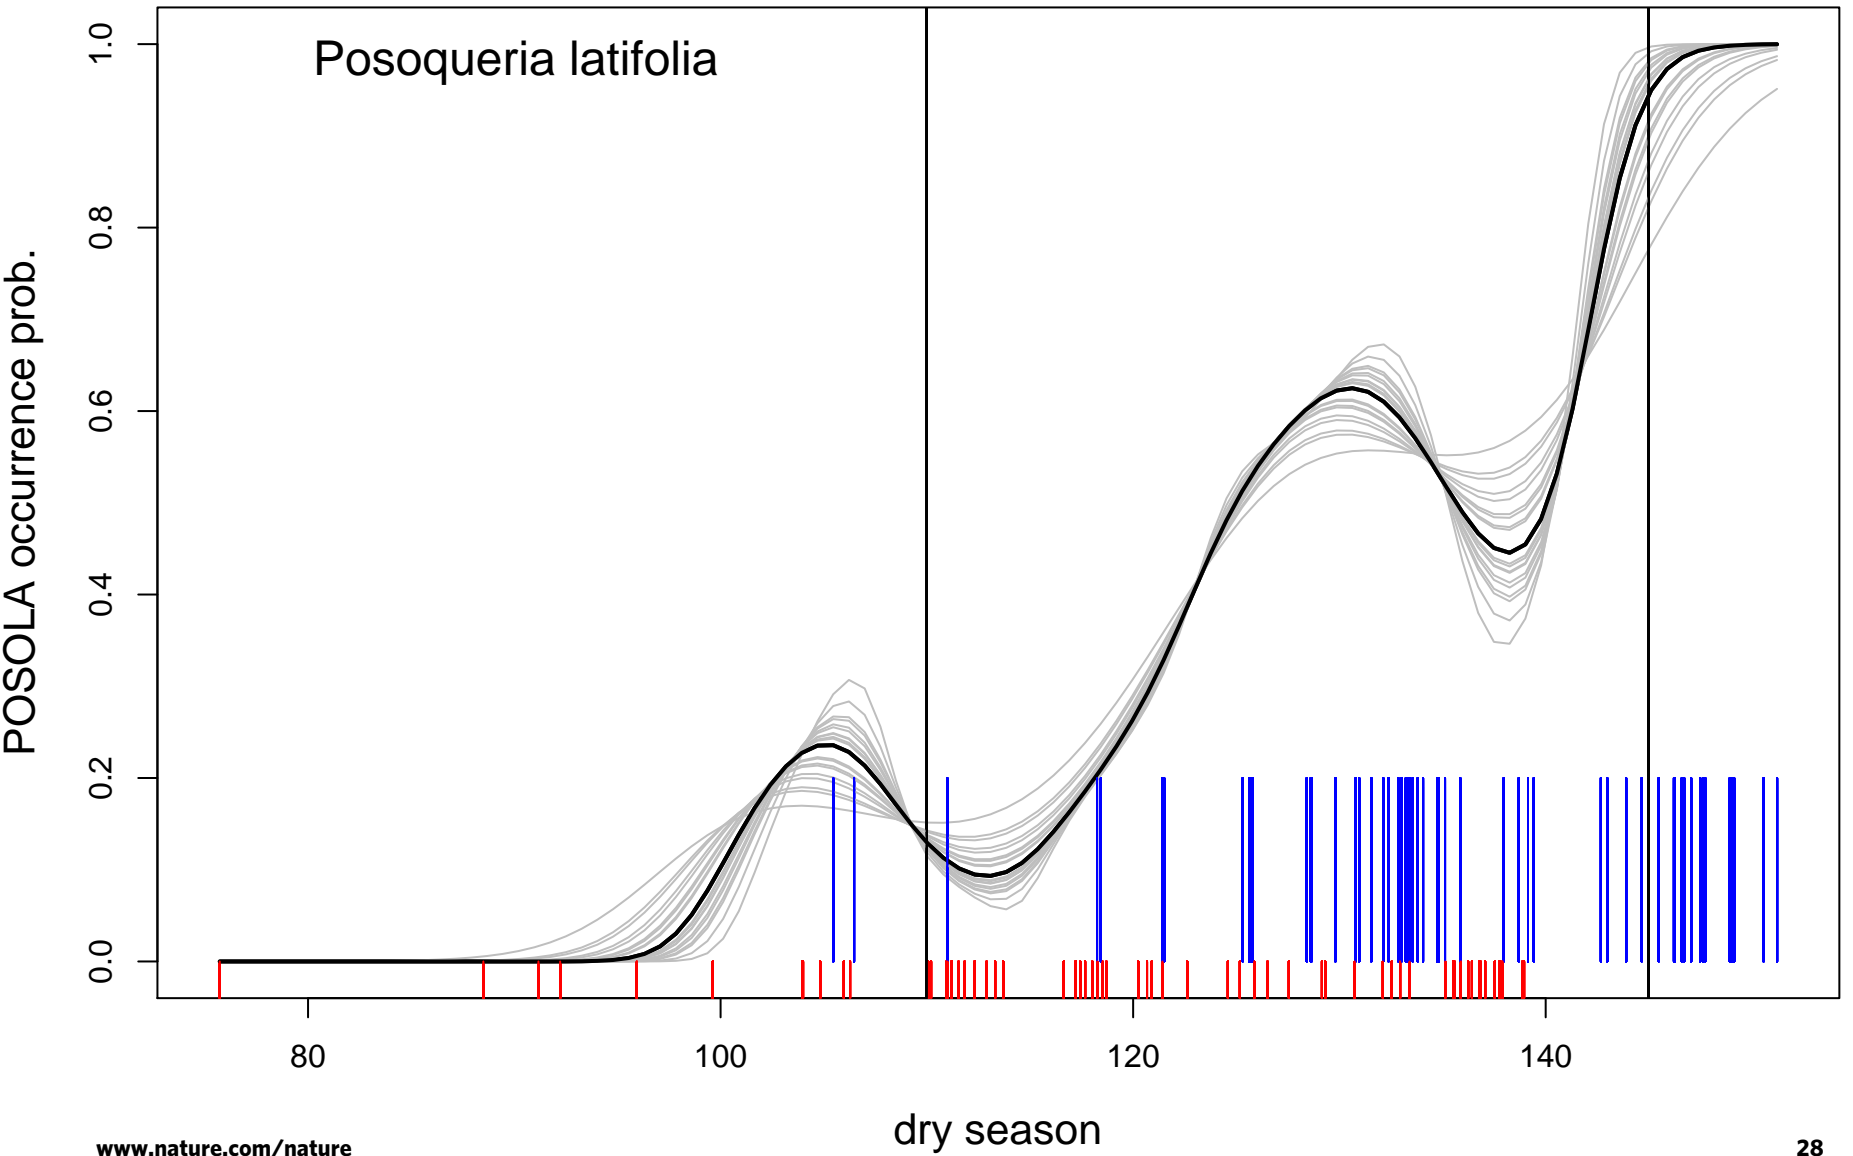

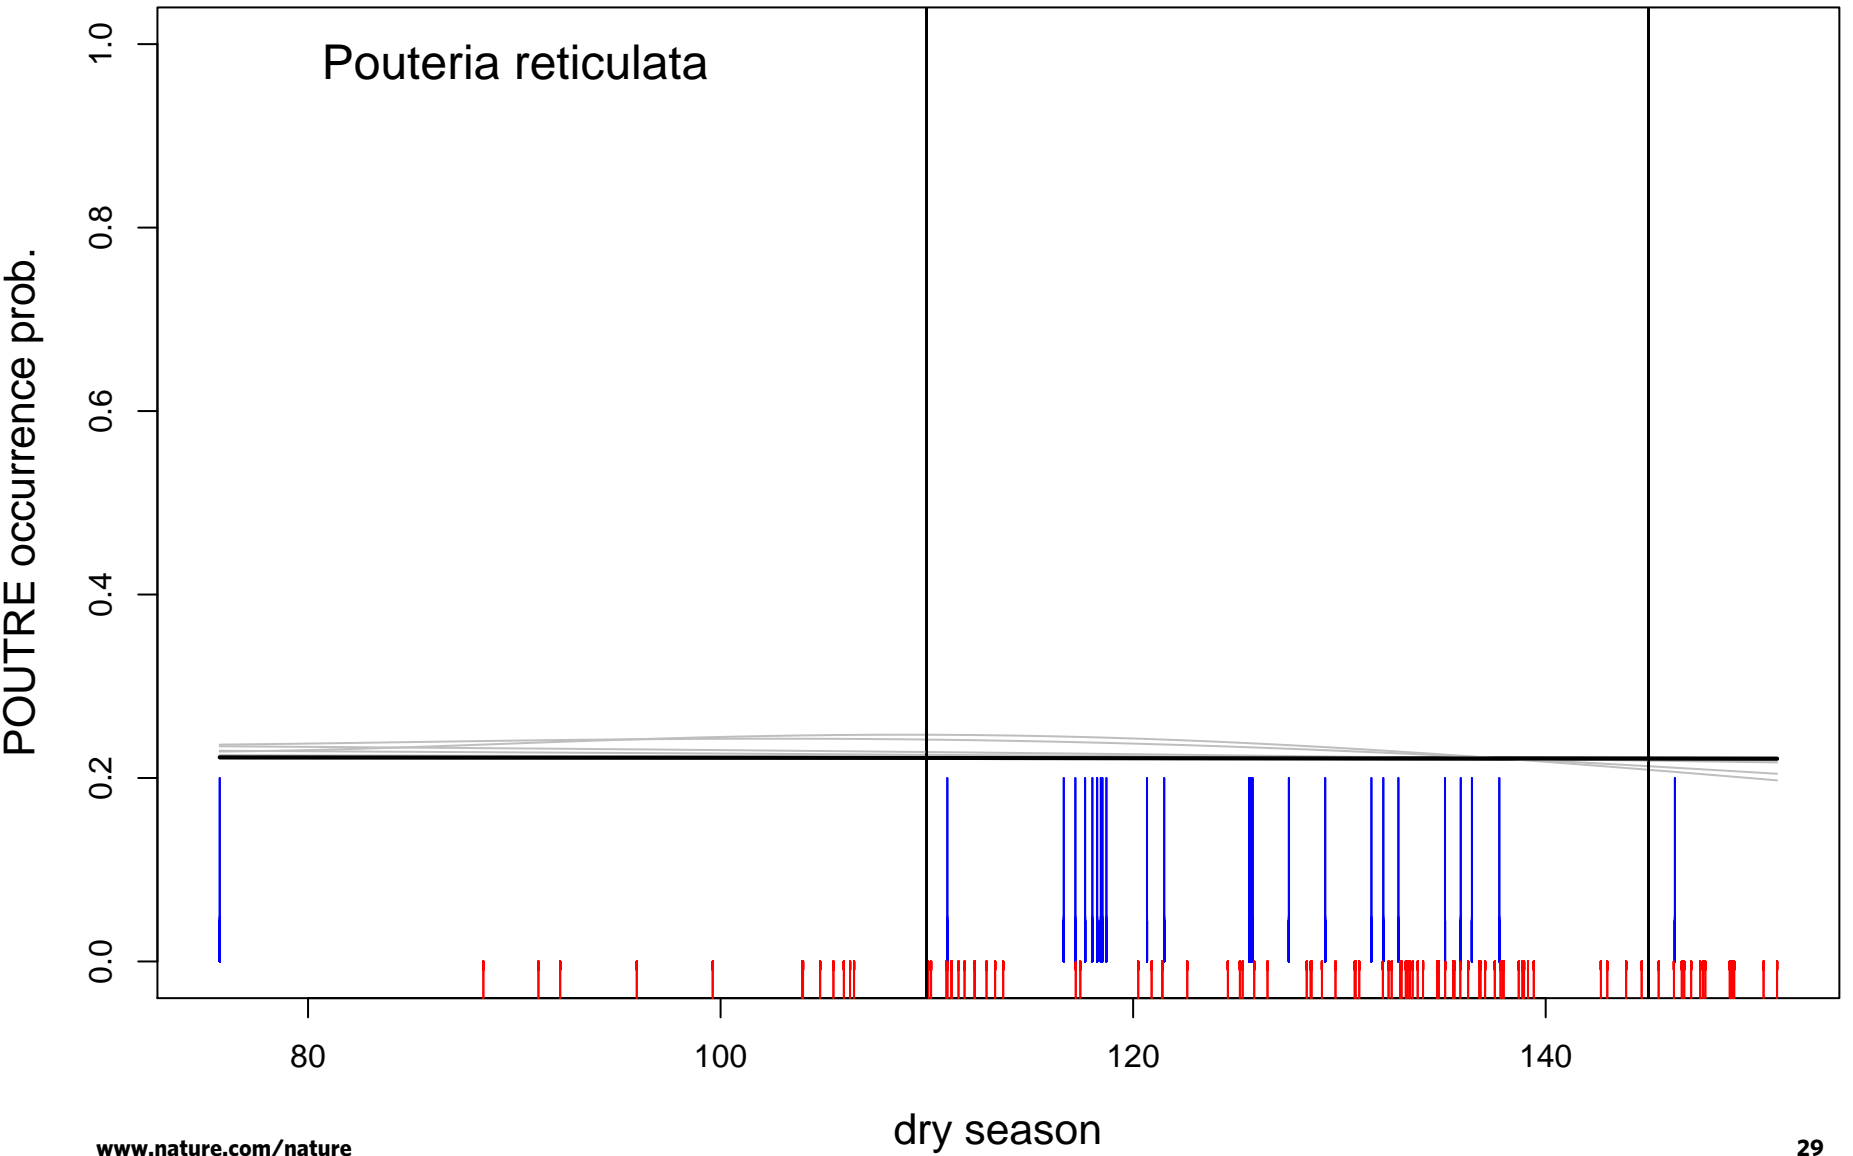

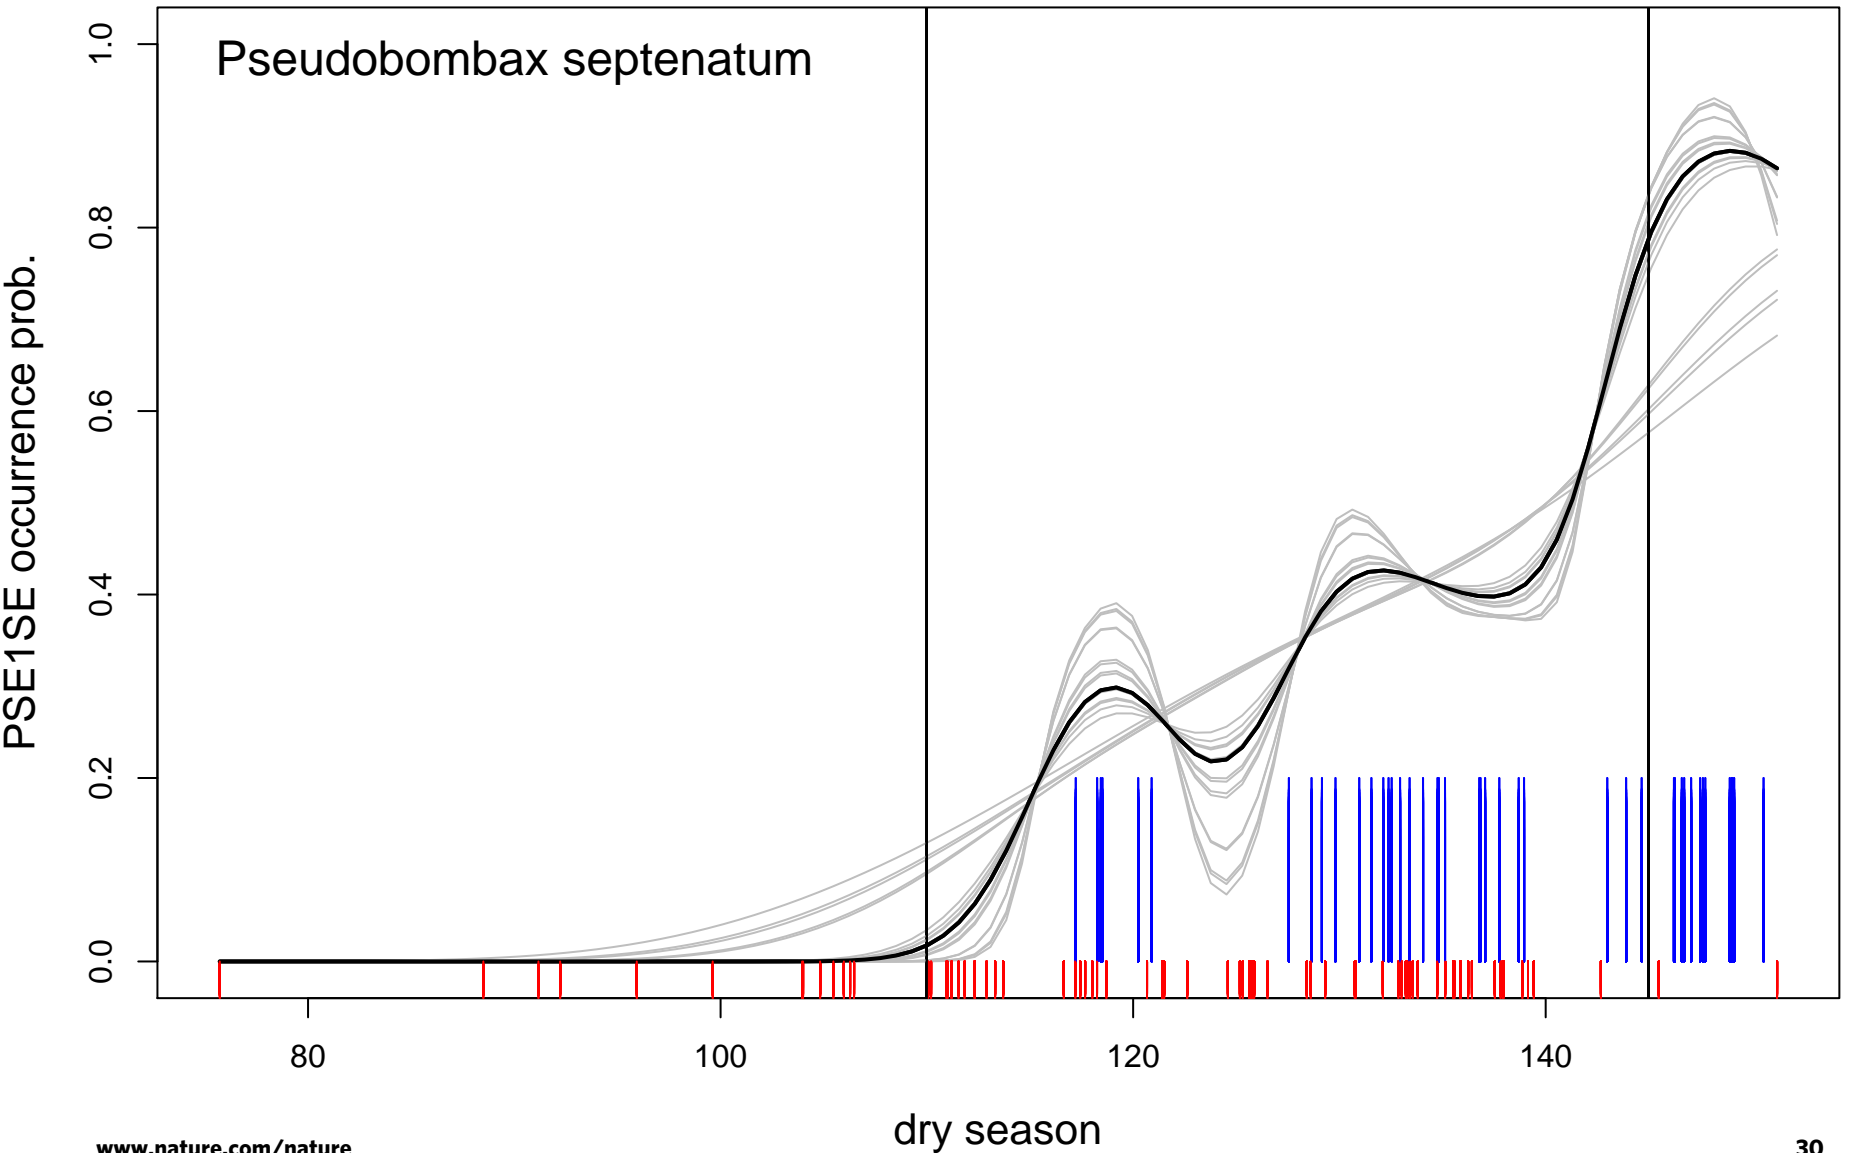

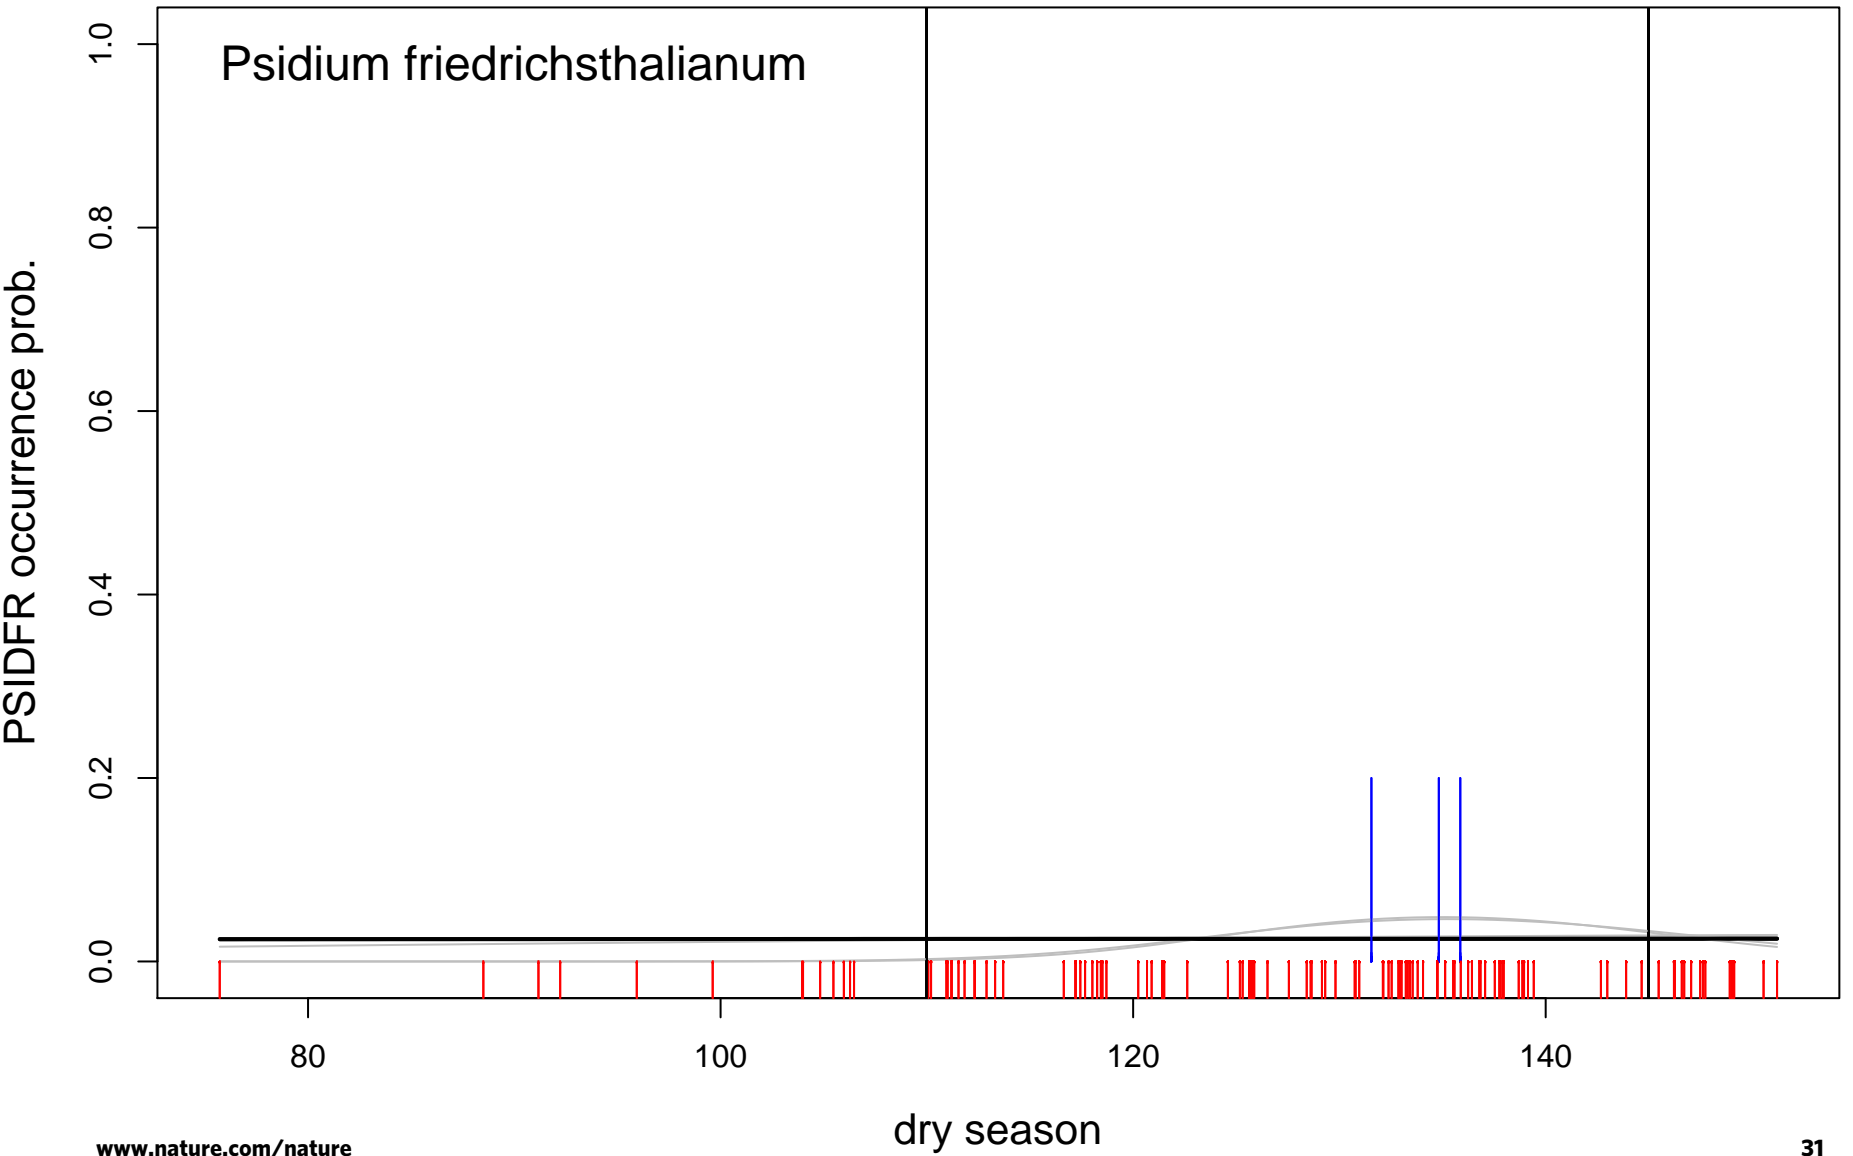

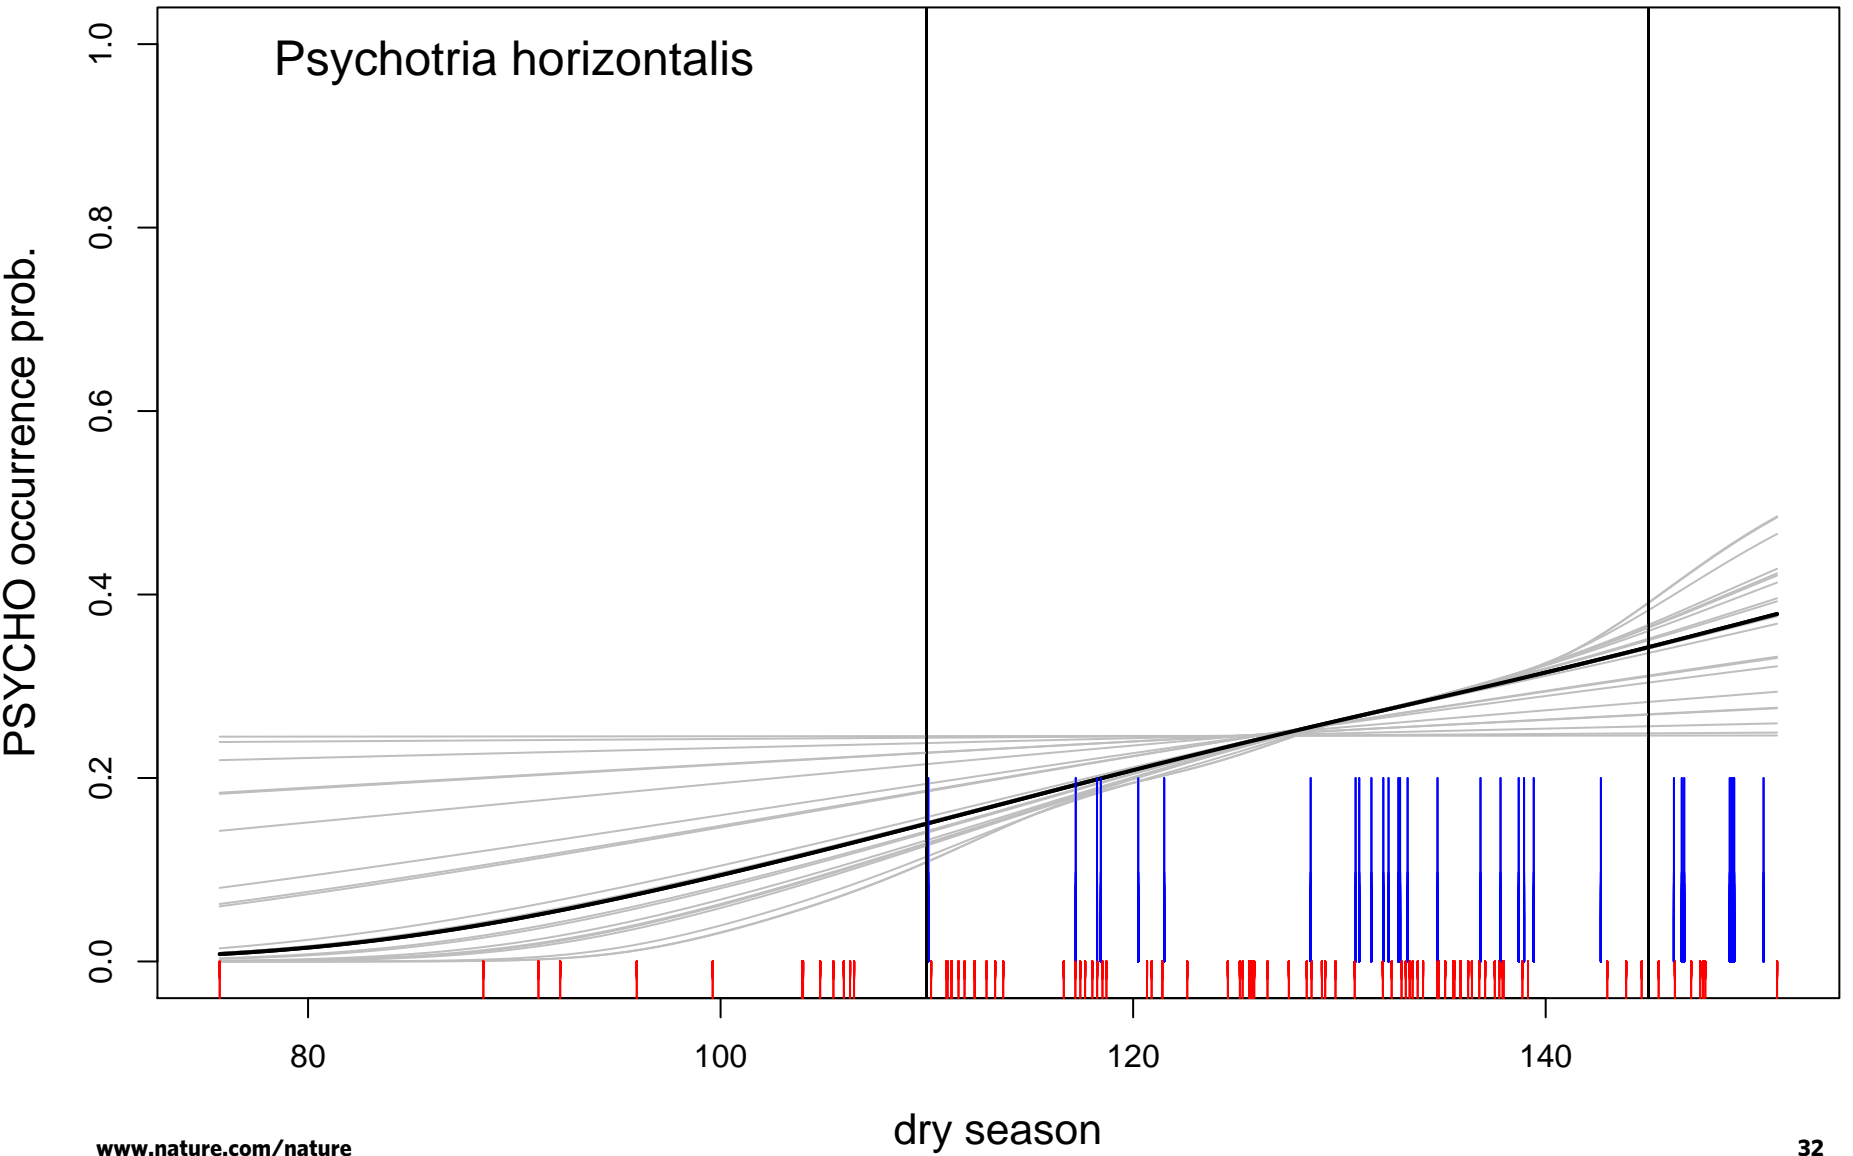



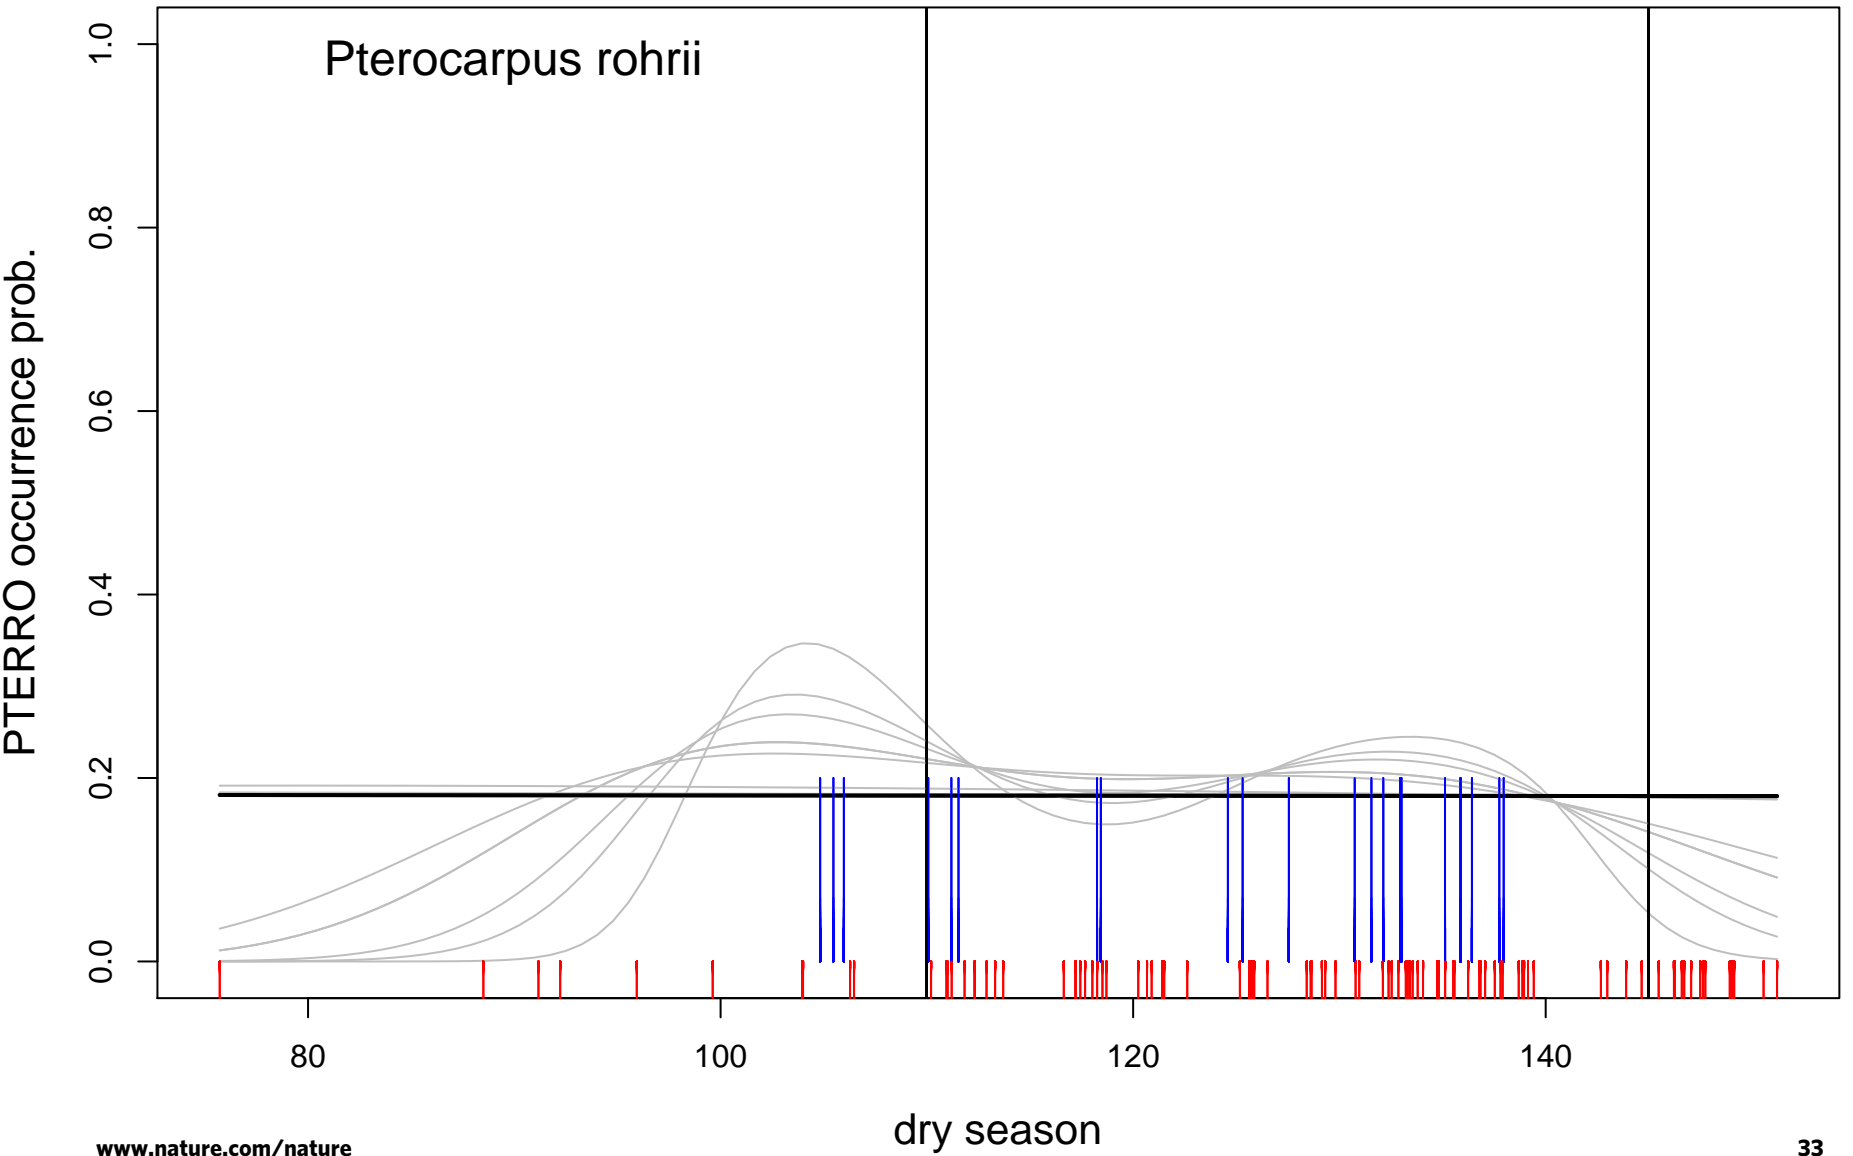

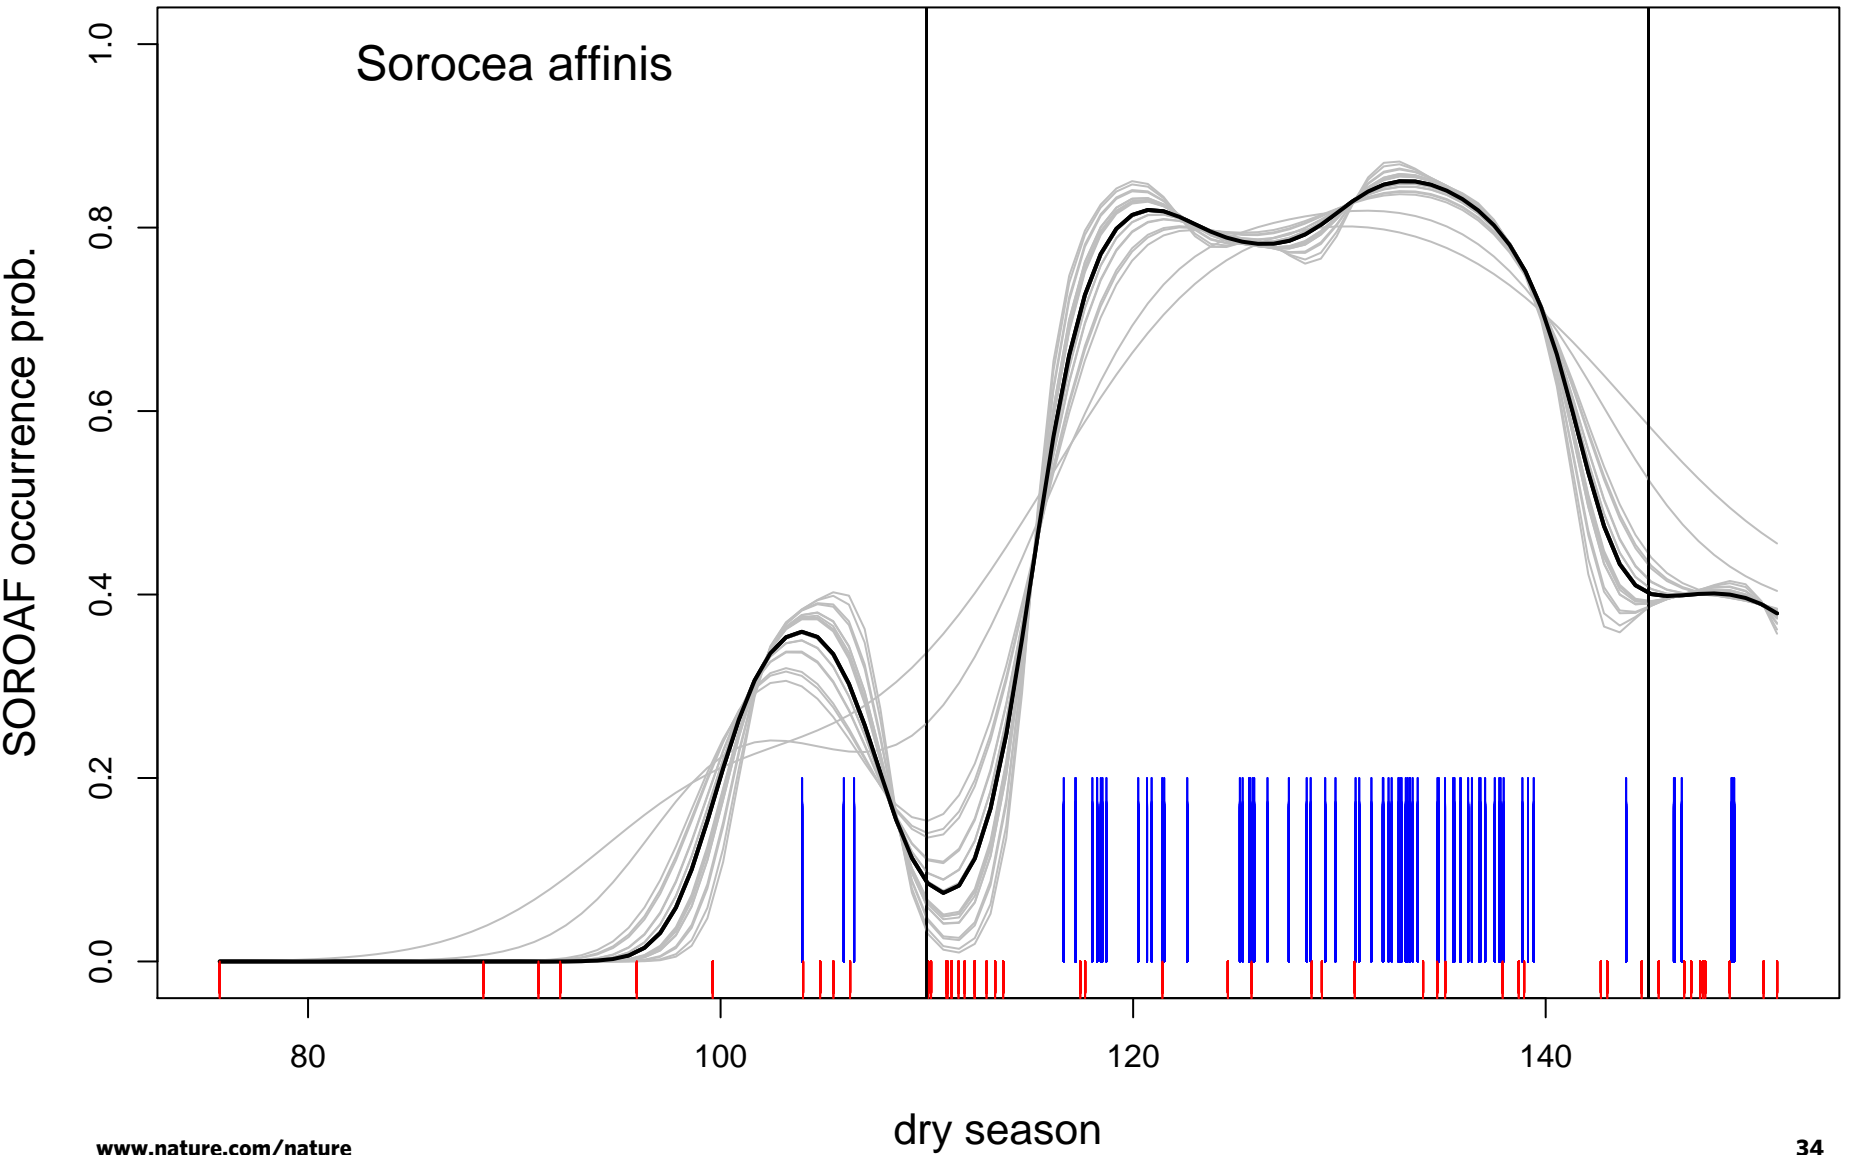

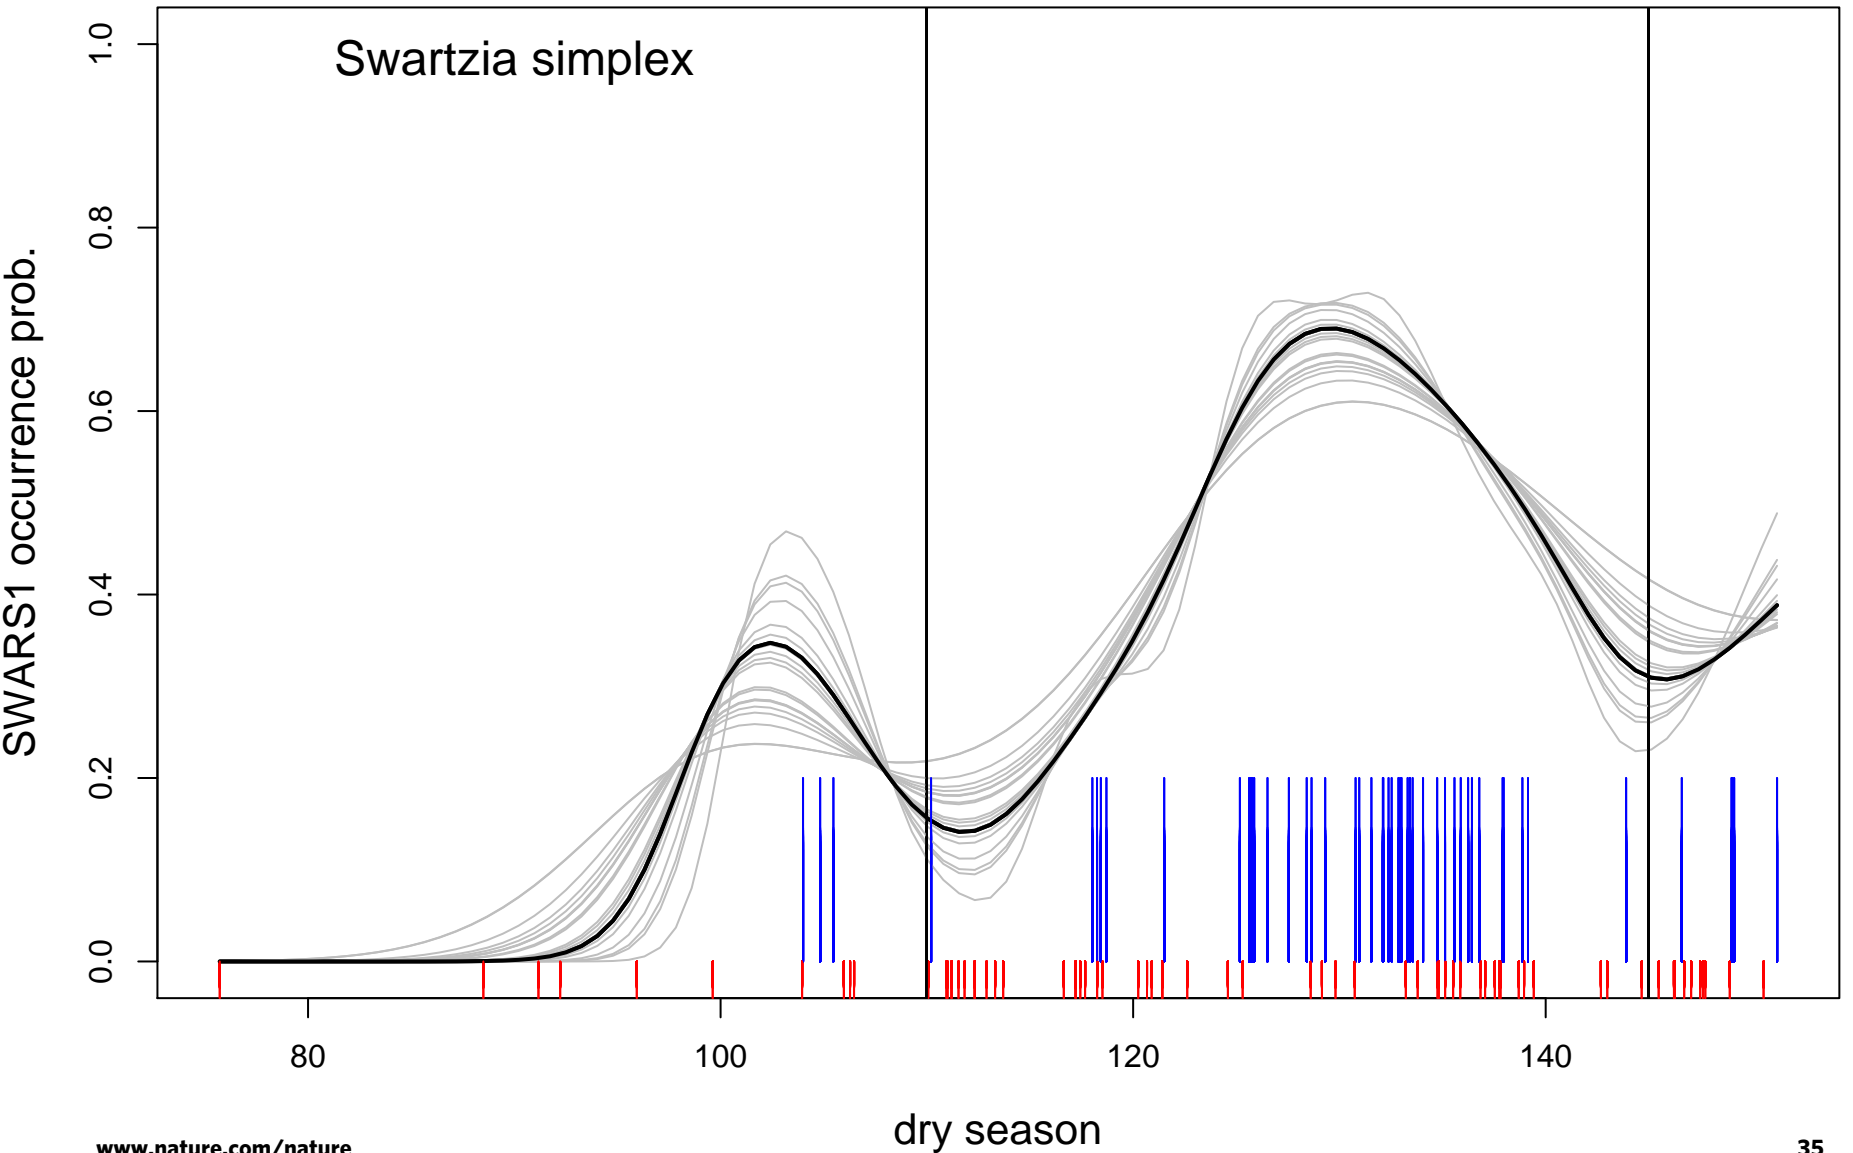

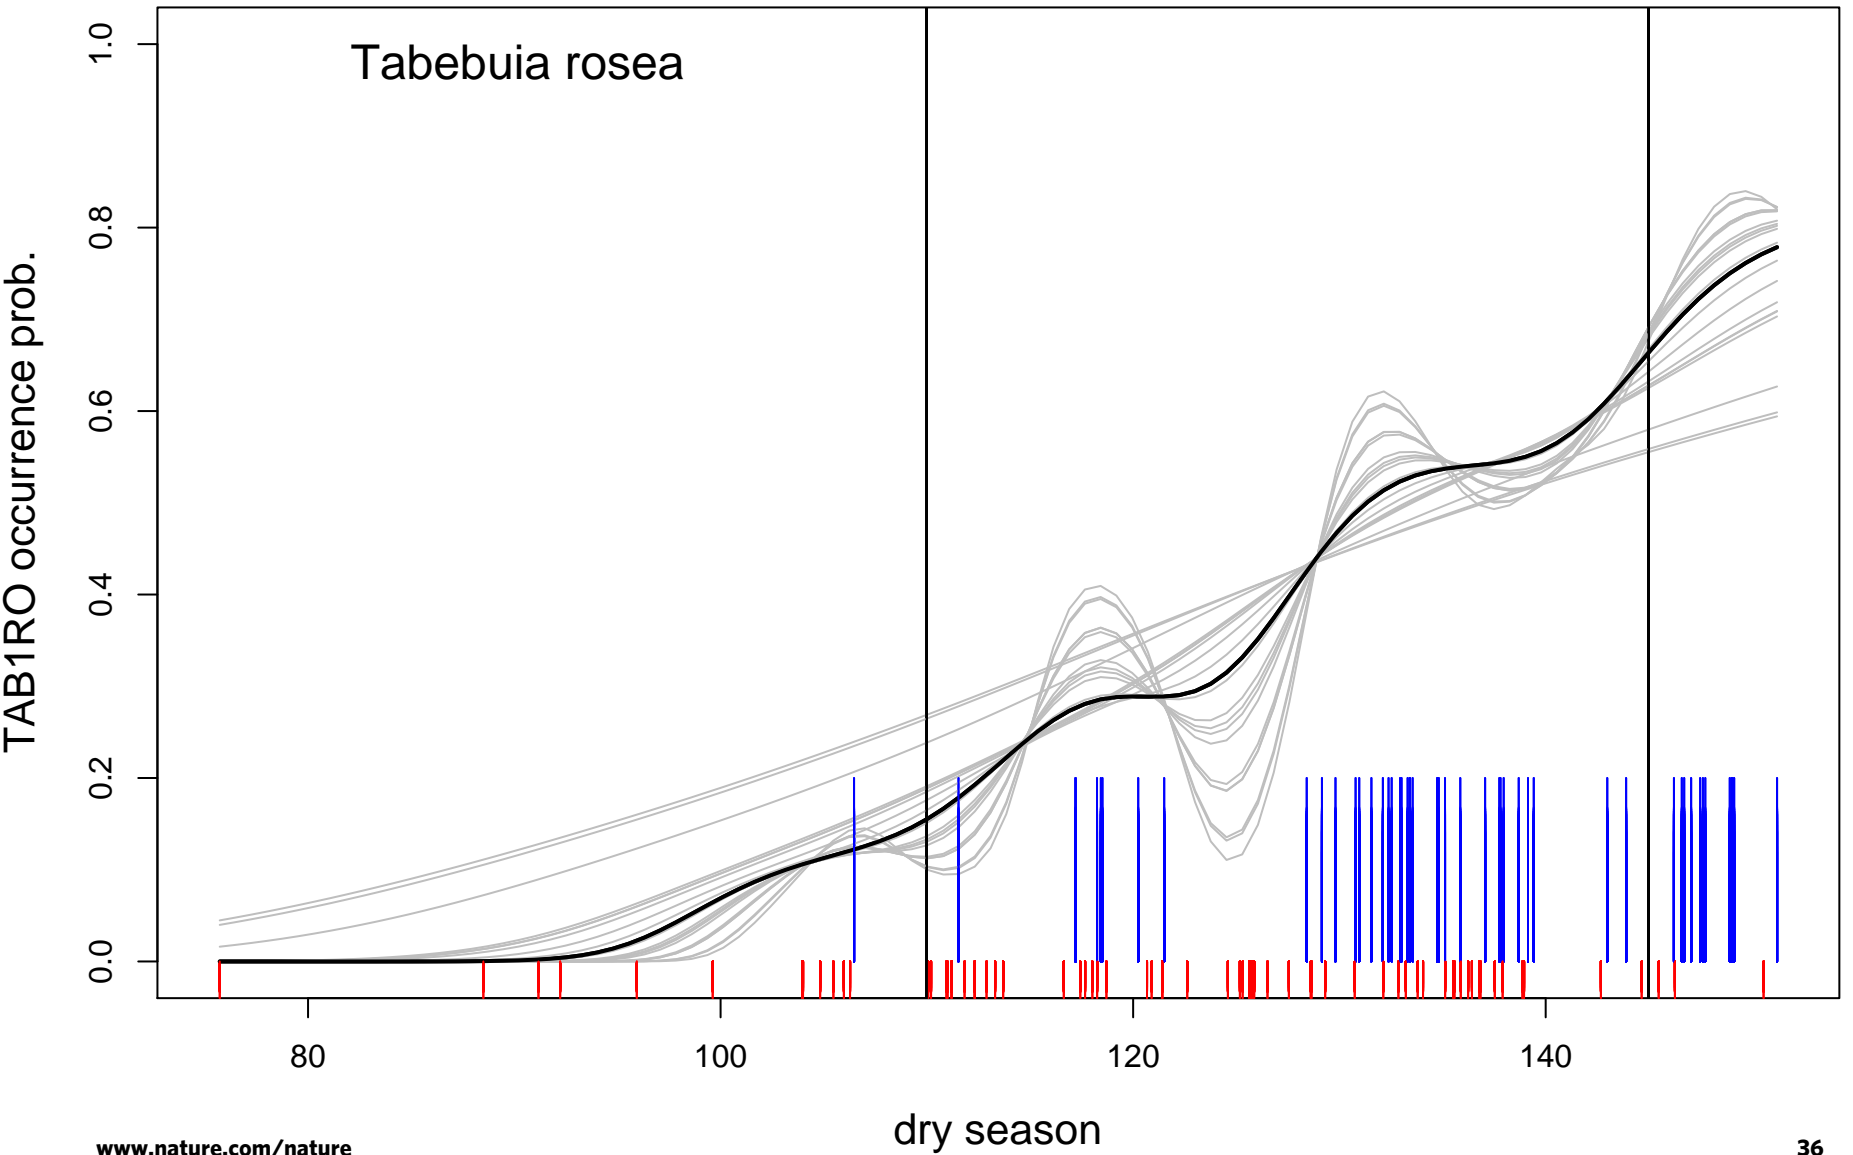

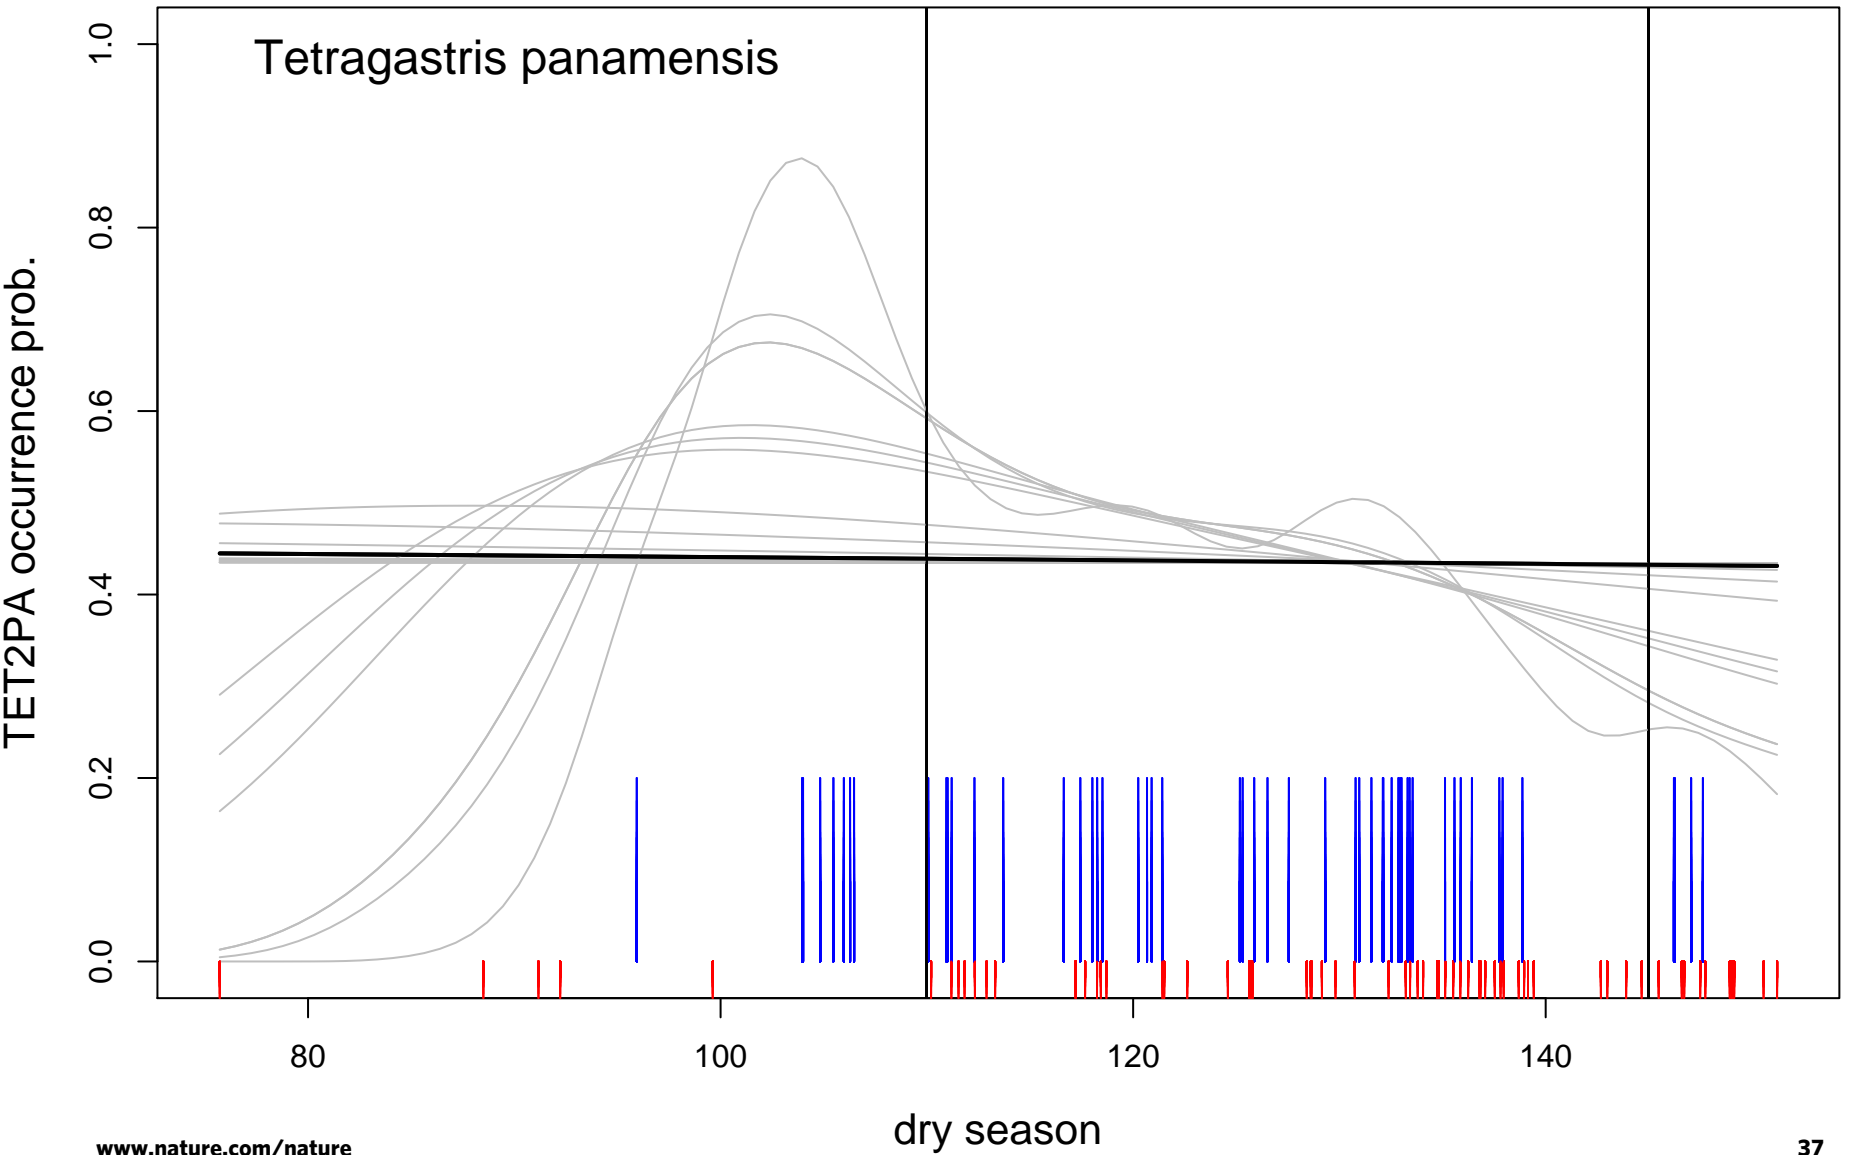

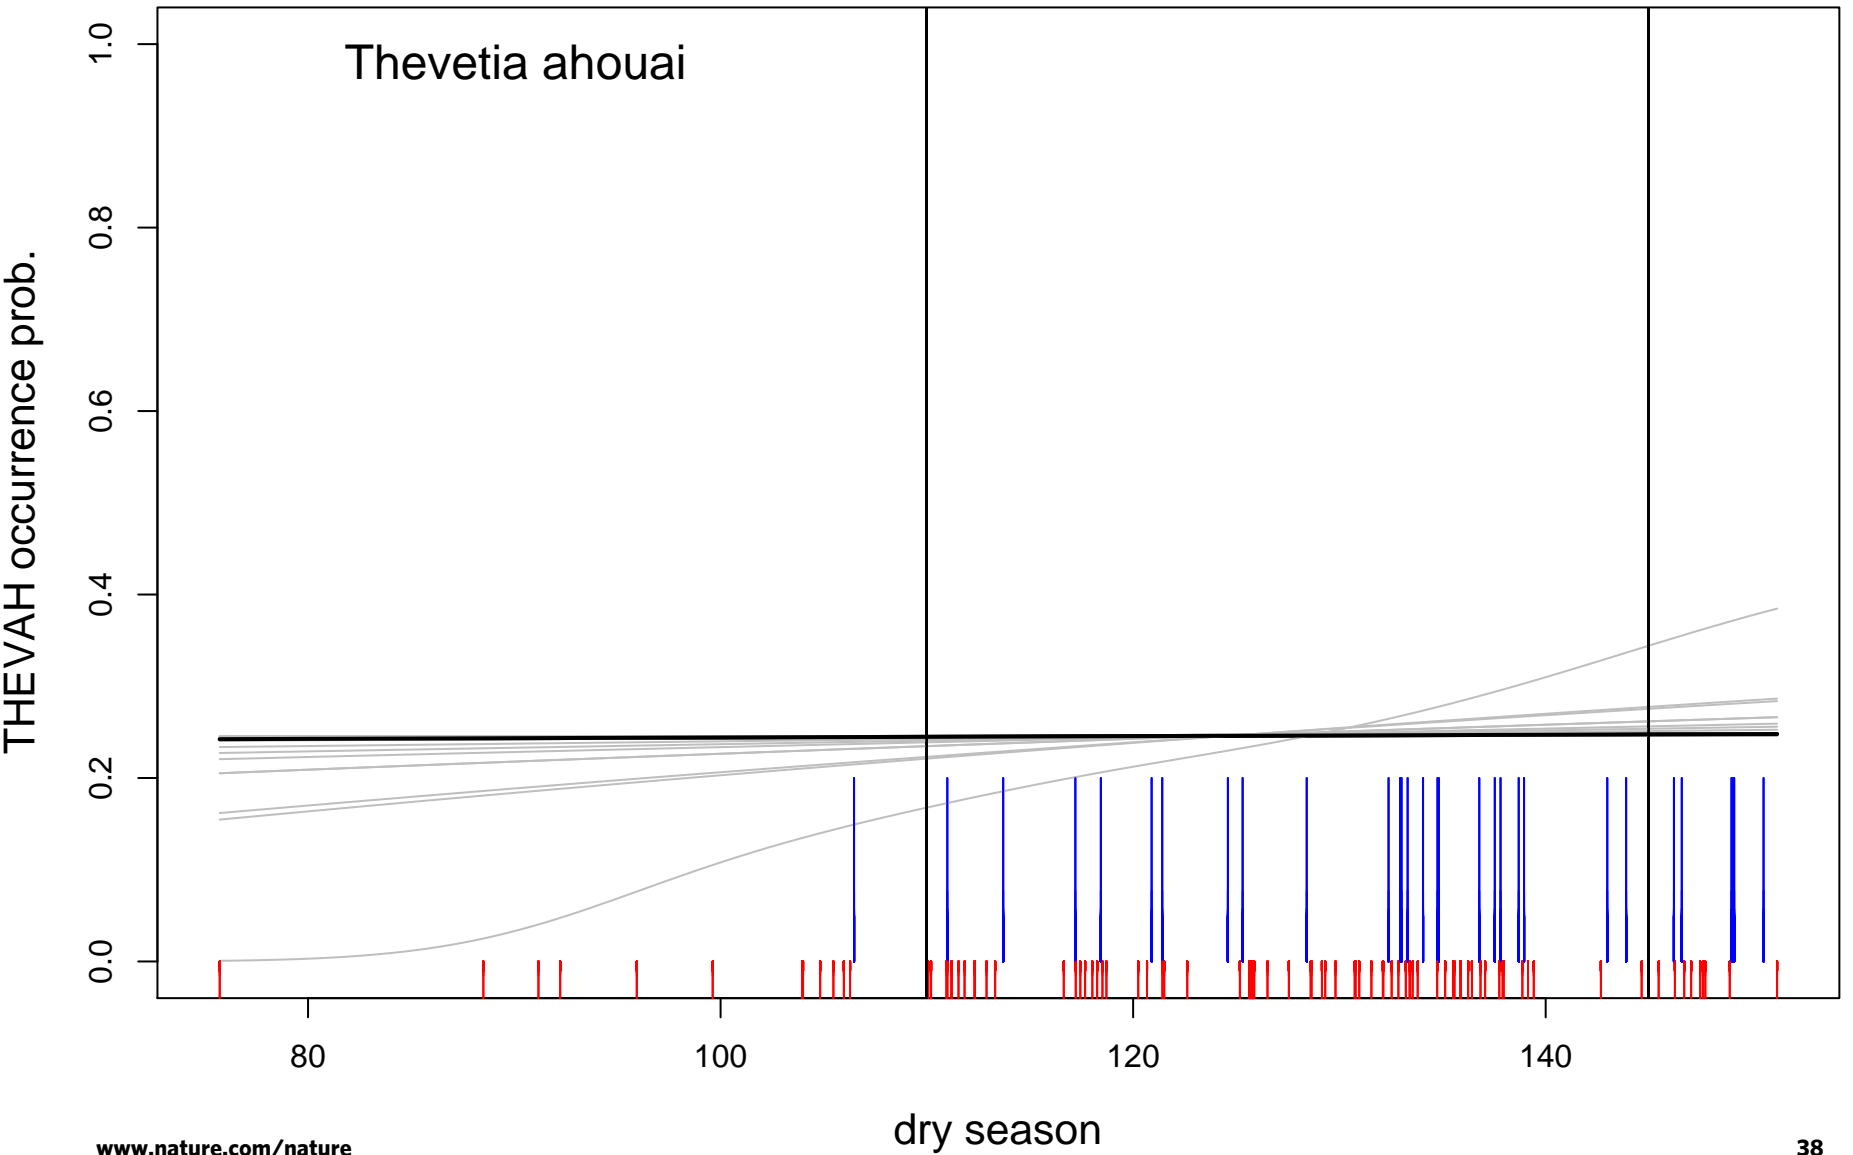

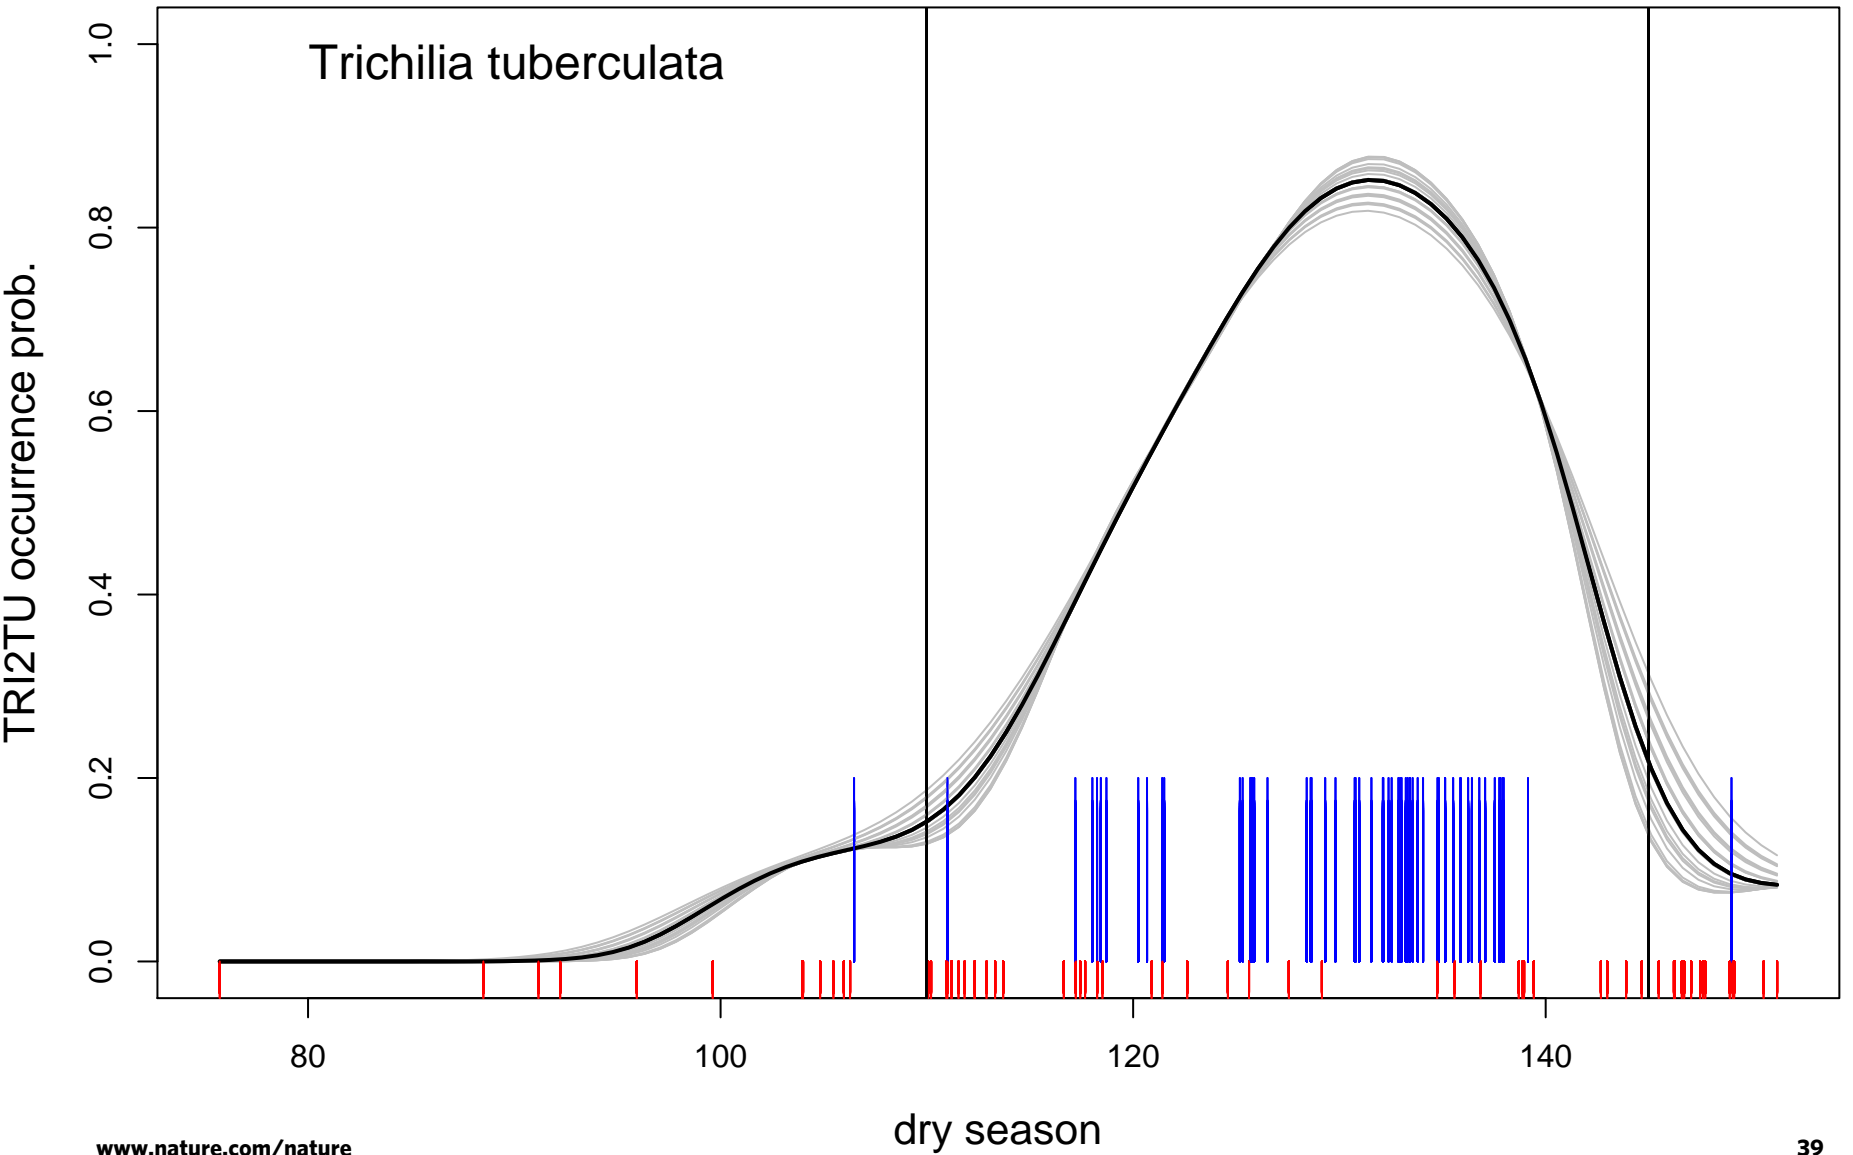

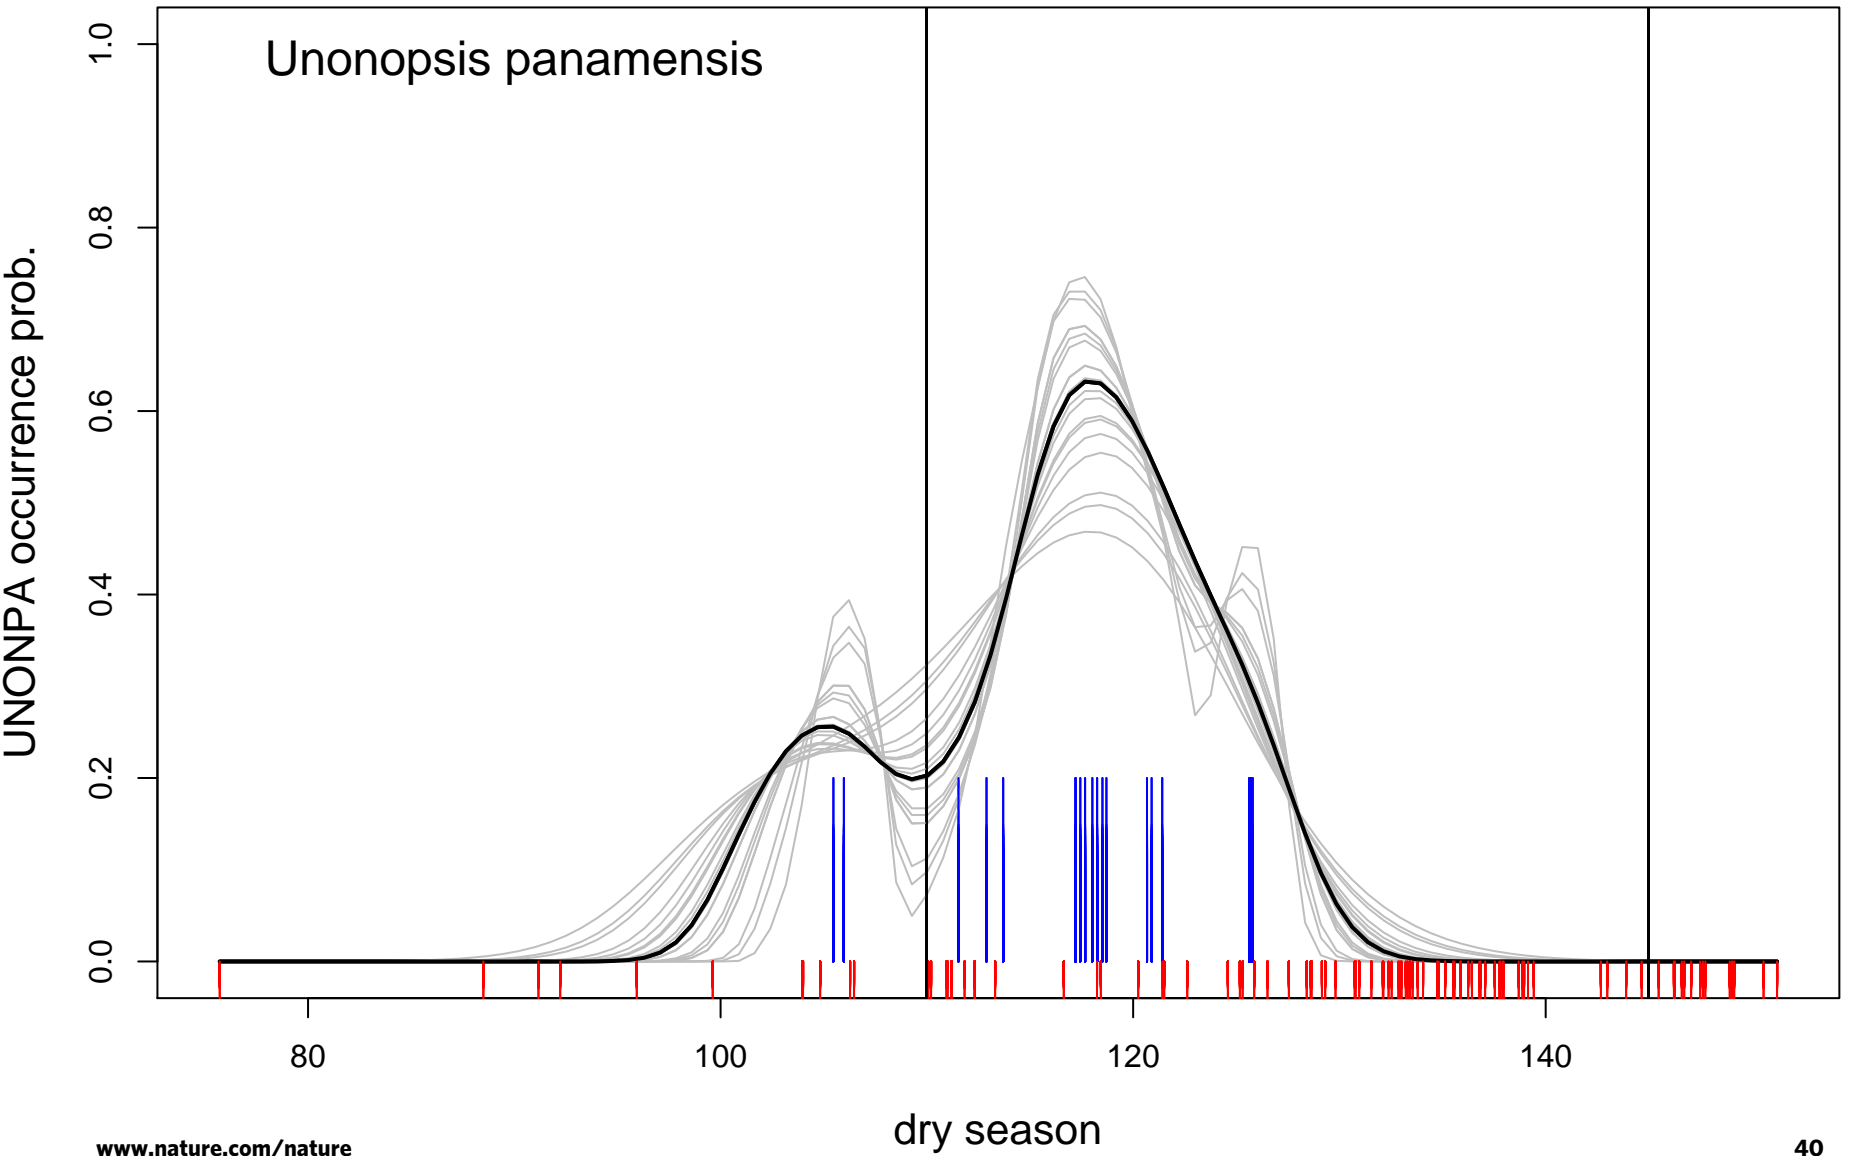



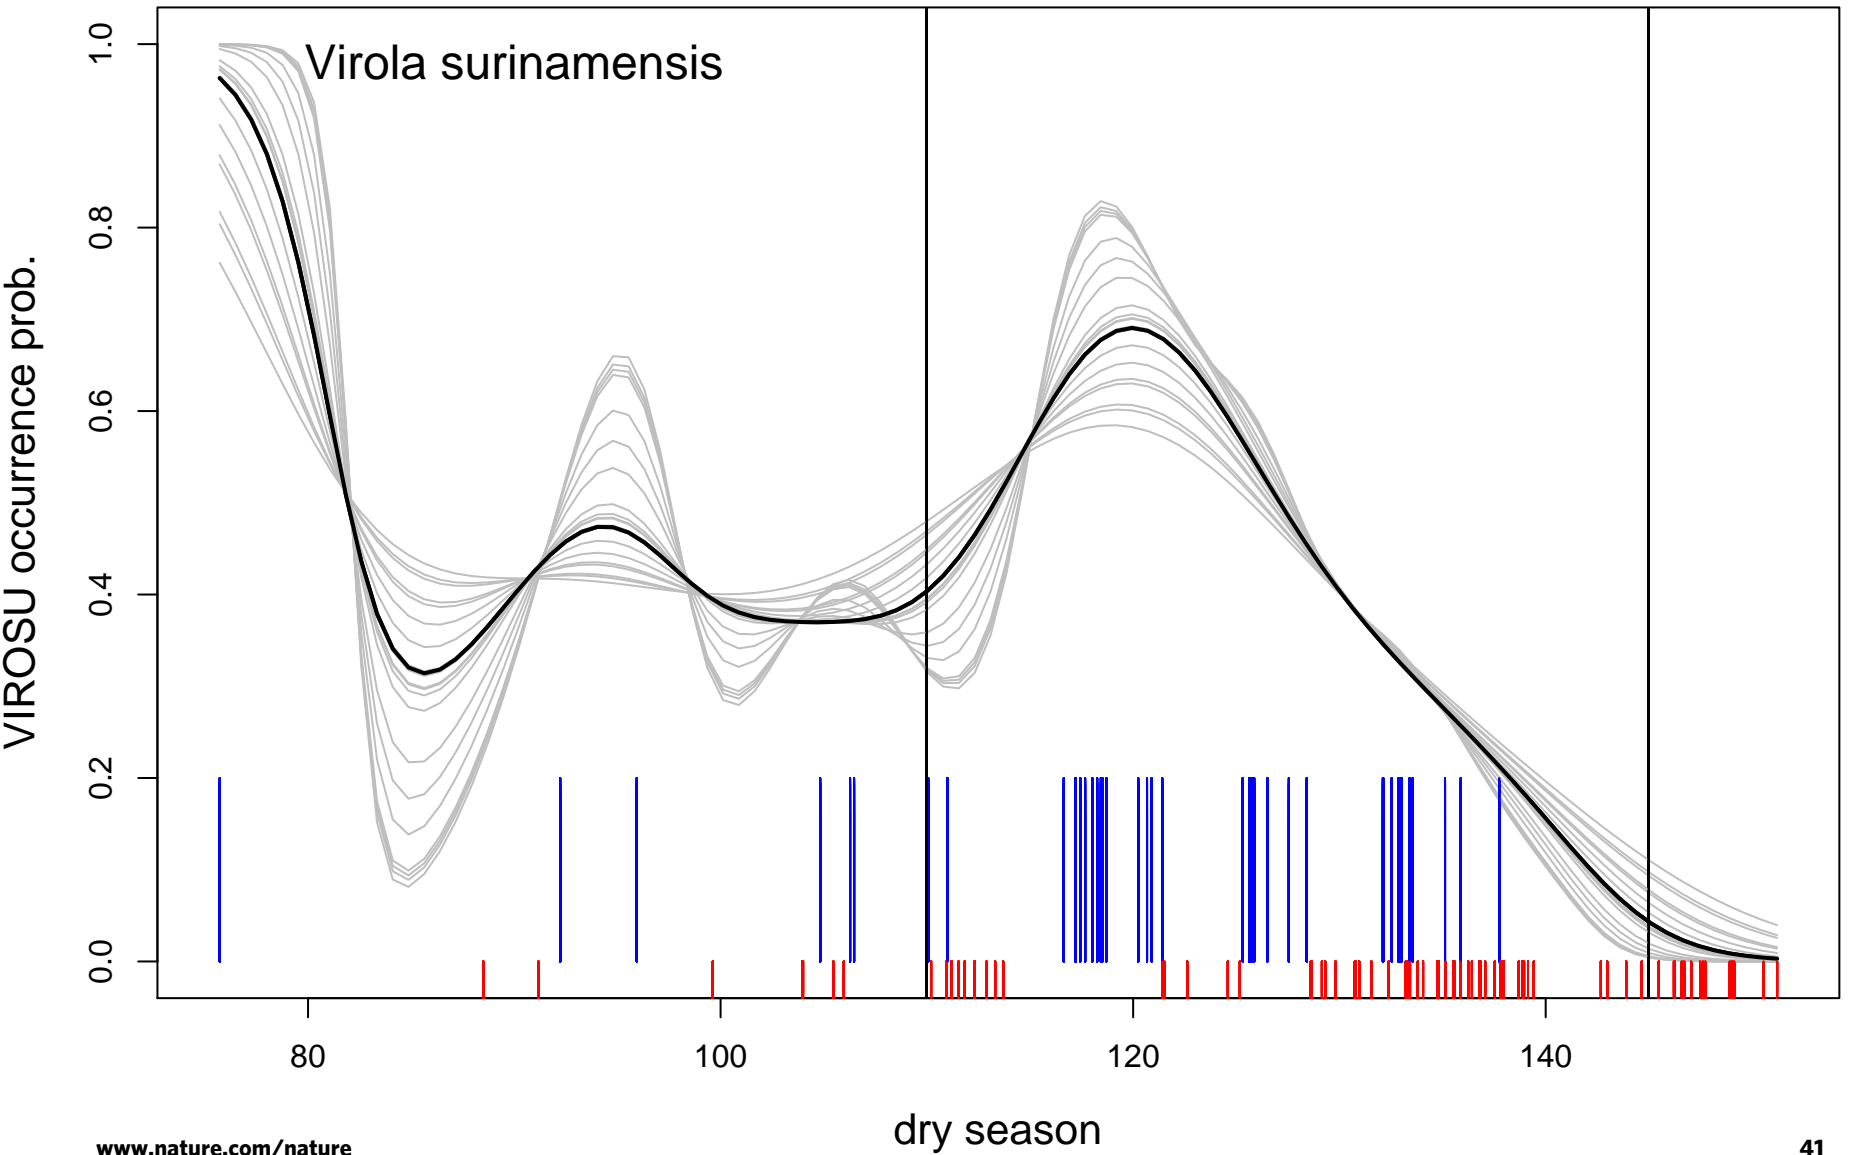

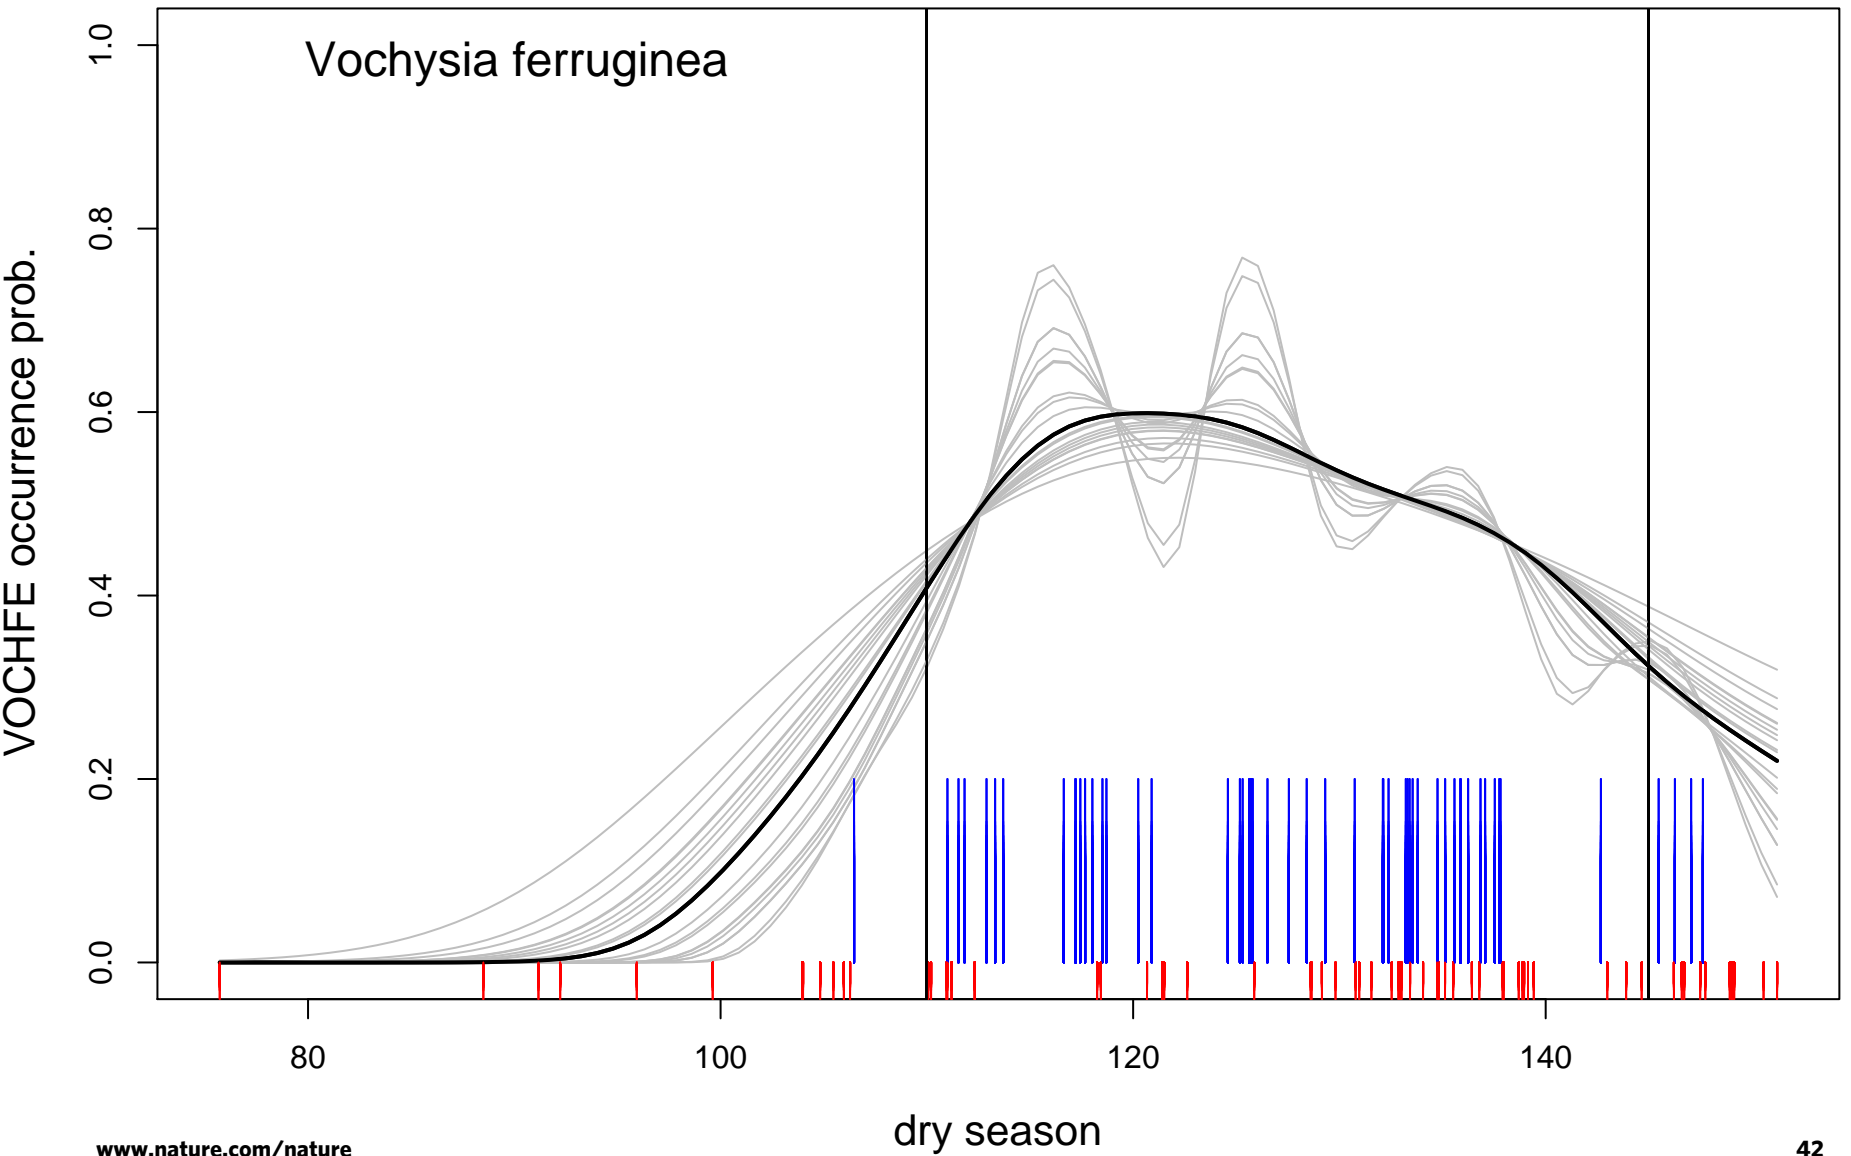

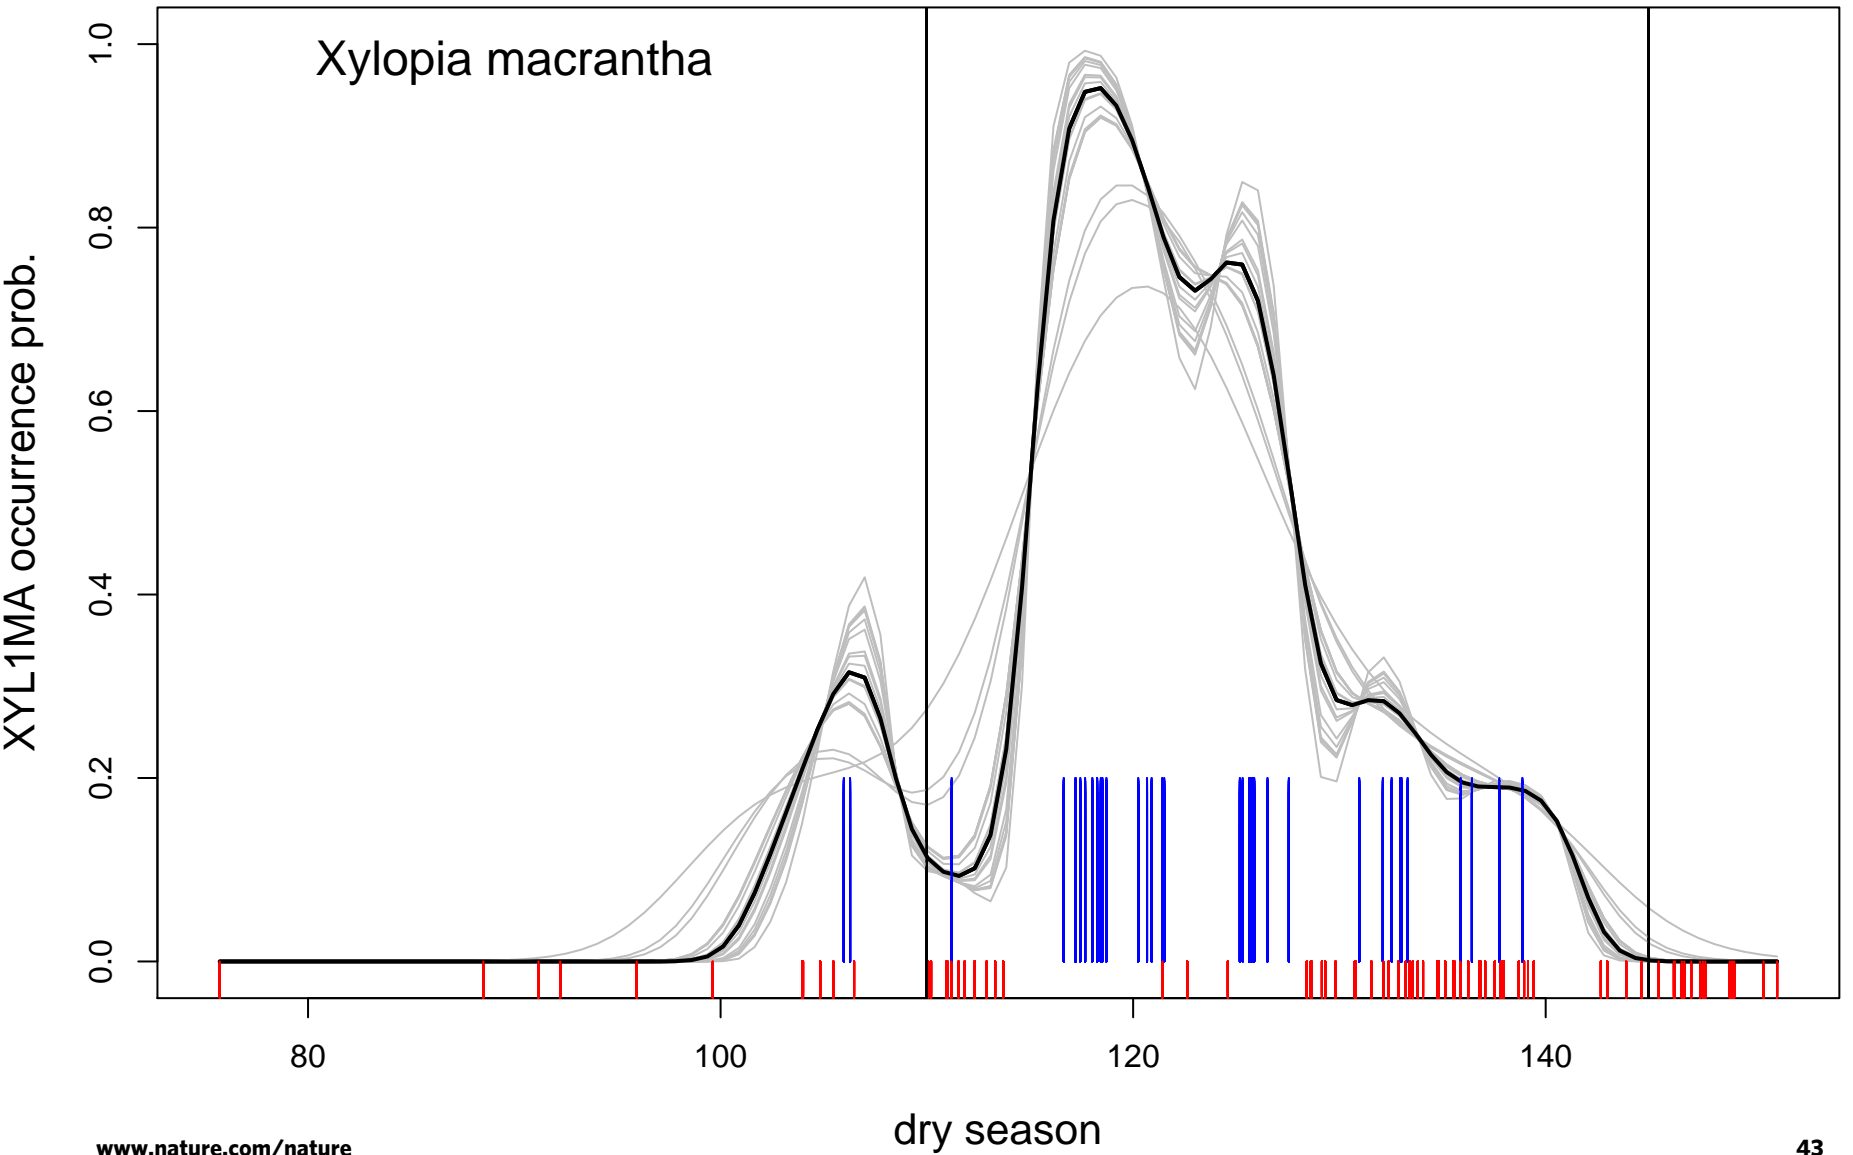

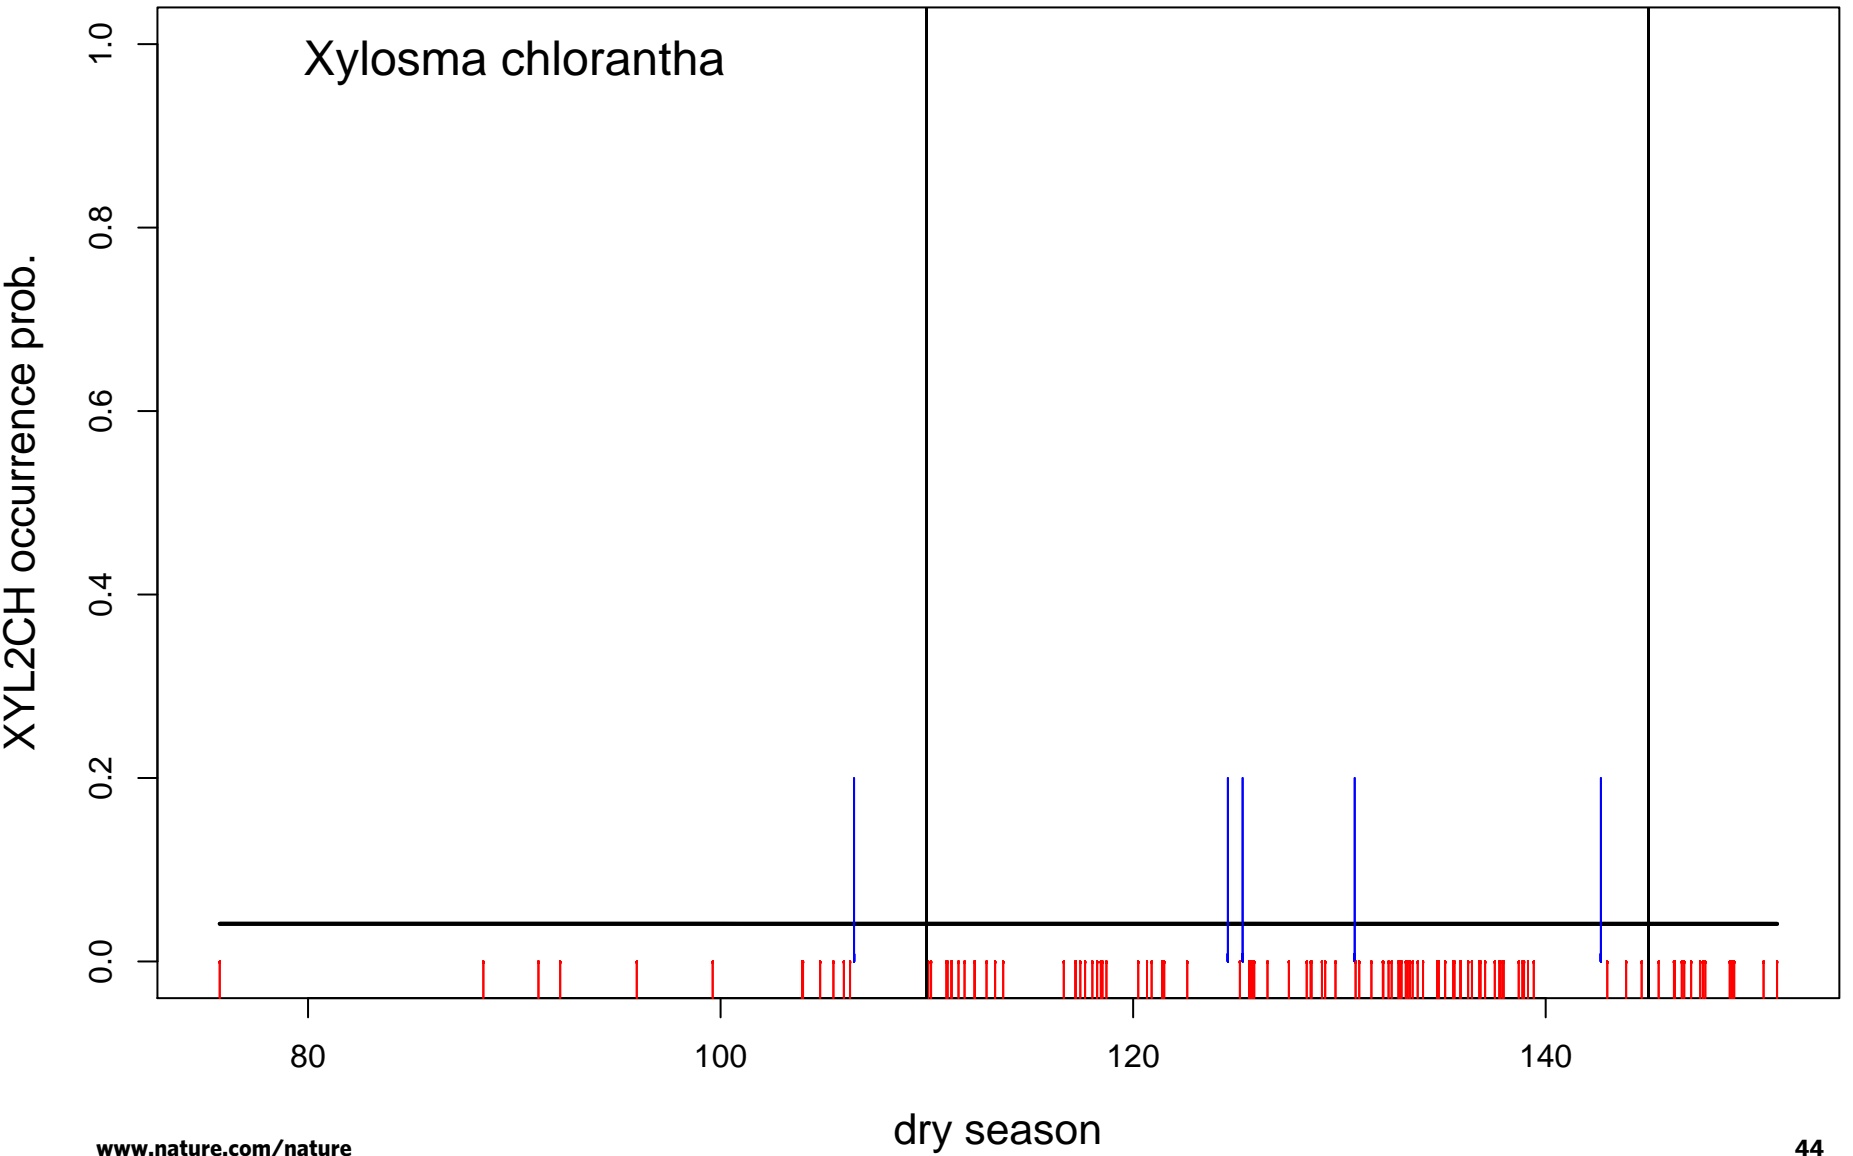

Supplement: 41586_2007_BFnature05747_MOESM437_ESM.pdf [file 41586_2007_BFnature05747_MOESM437_ESM.pdf]
